# Supplementary material for: Deep Sequencing of Plasma Exosomal microRNA Level in Psoriasis Vulgaris Patients
Source: Front Med (Lausanne). 2022 May 19;9:895564. doi: 10.3389/fmed.2022.895564 (PMC9160332; doi:10.3389/fmed.2022.895564)
Supplement: Supplementary file 3 [file Data_Sheet_3.XLS]

## Sheet: Data_Sheet_3
miRNA_ID	PV1	PV2	PV3	PV4	PV5	PV6	PV7	PV8	PV9	PV10	PV11	PV12	PV13	PV14	PV15	HC1	HC2	HC3	HC4	HC5	HC6	HC7	HC8	HC9	HC10	HC11	HC12	HC13	HC14	HC15	PV	HC	up/down	log2(foldchange)	P-value	Significance-Lab
hsa-miR-106b-3p	101.61	45.2447	323.534	70.9785	53.4405	431.859	159.998	298.025	195.198	10.993	23.0645	137.123	230.911	41.022	669.39	27.9876	18.978	21.1839	13.7869	21.1839	36.4012	16.681	17.5124	10.8688	11.4675	7.4343	96.2512	10.8688	13.7869	25.4469	186.159	23.3226	down	-2.9967	1.24166e-10	**
hsa-miR-370-3p	51.9515	4.7206	250.085	66.8338	5.0233	595.403	18.716	53.2221	69.5017	6.649	277.353	55.2525	59.6065	34.2774	4253.22	16.6944	8.5314	6.9483	3.5551	6.9483	31.2242	6.276	3.2679	2.192	3.2979	6.2649	74.0786	2.192	3.5551	4.476	386.788	11.9668	down	-5.0144	2.27465e-10	**
hsa-miR-769-5p	22.0507	6.1004	130.609	13.6431	9.3203	69.3118	48.7576	116.865	30.1204	3.7234	31.6533	36.4729	58.9434	7.4837	125.002	5.4993	0.5223	4.152	0.8671	4.152	8.8172	3.6335	3.2679	3.2881	9.294	2.673	26.3353	3.2881	0.8671	7.9988	47.3372	5.6437	down	-3.0683	1.81839e-09	**
hsa-miR-127-5p	0.2646	0.0726	5.1556	0.3454	0.1816	3.3941	0.8638	0.8374	0.7193	0.0887	8.8784	1.552	0.5158	1.2935	27.9221	0.2946	0	0.0847	0	0.0847	0.4045	0.0826	0	0	0	0.0835	0.6796	0	0	0.0829	3.4723	0.1198	down	-4.8572	9.8511e-09	**
hsa-miR-6515-5p	2.2051	0.7989	11.7309	2.0724	2.4814	20.3648	3.8392	7.4437	26.0744	0	10.2294	0.8536	5.3786	0.462	16.8889	0.5892	0.2612	0	0.0867	0	0.6471	0.4129	0.419	0.3653	0	0.2506	2.9733	0.3653	0.0867	0.7874	7.3882	0.483	down	-3.9351	1.68751e-08	**
hsa-miR-127-3p	472.943	41.5409	2847.17	731.631	34.1946	920.704	154.047	233.266	489.839	31.1174	129.894	261.363	213.965	121.588	7220.23	88.4802	103.16	73.042	30.2618	73.042	114.462	48.2264	28.9919	26.3958	35.5269	38.6752	137.453	26.3958	30.2618	82.1015	926.9	62.4317	down	-3.8921	2.3783e-08	**
hsa-miR-2115-5p	1.4112	0.2179	1.3449	0.6044	0.121	0.0893	1.4397	4.3731	0.989	0	1.158	0.3104	1.0315	0	0	0	0	0	0.0867	0	0	0	0.0838	0	0	0	0	0	0.0867	0	0.8727	0.0171	down	-5.6734	4.66205e-08	**
hsa-miR-4791	6.968	1.8882	1.3449	1.0362	1.6341	1.6077	0.096	0.5583	2.9671	1.1525	0	0.3104	6.2627	0	0	0	0	0	0.1734	0	0.1618	0.0826	0	0	0	0	0.6796	0	0.1734	0	1.7217	0.0847	down	-4.3453	1.35015e-07	**
hsa-miR-4488	3.2635	0.1452	2.0174	1.3816	0.0605	0.8039	4.511	6.048	0.6294	3.0142	23.4505	0.8536	12.3044	2.125	2.0341	1.473	0.5223	0.0847	2097.6	0.0847	0.4045	0	1.5082	0.6393	7.4951	0.2506	6.3714	0.6393	2097.6	6.2996	4.1762	281.399	up	6.0743	2.76312e-07	**
hsa-miR-1-3p	30.871	8.9327	75.9894	39.7203	1.392	5.4485	10.2698	65.8763	47.2935	70.9228	24.9945	6.441	15.2516	12.8425	14.8548	171.068	158.266	22.7939	265.506	22.7939	506.624	11.6437	270.563	70.6932	441.013	90.465	751.49	70.6932	265.506	2.984	28.74	208.14	up	2.8564	4.13948e-07	**
hsa-miR-181c-3p	2.3815	0.581	4.1096	1.8133	2.6629	13.2193	2.6874	4.6523	4.2258	0.3546	3.4741	1.7072	1.0315	0.9239	6.472	0	0.1741	0.6779	0	0.6779	0.6471	0.3303	0	0.4567	0	0.2506	1.9539	0.4567	0	0.0414	3.3531	0.3778	down	-3.1498	4.63096e-07	**
hsa-miR-5187-5p	0.5292	0.2179	6.4258	1.4679	1.0894	7.4135	6.3346	8.8393	2.2478	0.0887	3.5706	0.388	2.2841	0.0924	12.944	0.3928	0	0.0847	0.2601	0.0847	0.9707	0.0826	0.5865	0.274	0	0	2.8884	0.274	0.2601	0.3316	3.5955	0.4327	down	-3.0548	9.34887e-07	**
hsa-miR-203a-3p	0.7938	0.4357	0.0747	0.1727	0	0.1786	1.2477	1.2096	1.8881	1.9504	0.0965	3.1041	1.5473	0.6467	0.0616	0.7856	0.7835	0.6779	112.463	0.6779	15.0458	0.1652	2.9327	19.637	2.2485	0	2.8884	19.637	112.463	2.1137	0.8938	19.5013	up	4.4475	1.27383e-06	**
hsa-miR-4433b-3p	50.1874	33.4797	219.002	203.264	97.0764	268.673	211.923	281.742	166.876	8.688	1084.13	40.1978	426.014	31.2284	1937.1	29.5589	101.419	10.6767	36.5916	10.6767	34.7834	8.0102	35.6114	37.082	29.0061	4.5943	52.9254	37.082	36.5916	37.2586	337.305	33.4579	down	-3.3336	1.37341e-06	**
hsa-miR-136-5p	0.5292	0.0726	10.0871	1.727	0.1816	4.198	0.192	0.4652	0.5395	0.1773	2.0266	0.1552	1.2525	0.2772	24.2854	0.1964	0	0.0847	0	0.0847	0.2427	0	0	0.1827	0	0.1671	1.6141	0.1827	0	0	3.0778	0.1837	down	-4.0665	1.62776e-06	**
hsa-miR-122-5p	2205.78	1116.88	3127.37	11270.7	1812.13	23830.8	1302.06	4329.51	1165.62	573.41	2148.08	5434.07	24011.3	8815.01	3229.16	448441	1870.64	4969.32	5149.45	4969.32	1003.78	1814.02	18462.8	6057.51	10153.8	1456.21	31132.6	6057.51	5149.45	261563	6291.46	53883.4	up	3.0984	2.39891e-06	**
hsa-miR-490-3p	0.5292	0.0726	1.4197	0.1727	0	1.4291	0.2879	2.2331	0.6294	0	0.386	4.2681	0.2947	0.1848	9.8005	0	0	0	0	0	0.3236	0.1652	0	0.0913	0	0	0	0.0913	0	0	1.4472	0.0448	down	-5.0136	3.11045e-06	**
hsa-miR-1307-3p	574.641	244.307	1172.49	345.049	120.861	2125	661.874	1584.1	449.379	127.218	1844.96	280.065	891.74	47.2122	2561.19	208.974	123.705	123.799	29.7415	123.799	595.524	144.101	130.044	74.3466	65.6573	59.7253	324.349	74.3466	29.7415	162.089	868.673	151.329	down	-2.5211	3.41233e-06	**
hsa-miR-326	16.6703	5.2289	76.363	8.1168	7.7467	51.7159	28.6979	50.0586	21.1292	2.6596	27.0211	9.0018	21.4407	6.1902	40.1881	1.5712	3.6563	4.6605	0.5203	4.6605	7.9274	3.4683	5.2789	4.2014	0.2998	2.5895	19.9638	4.2014	0.5203	1.2019	24.8153	4.3148	down	-2.5239	3.83475e-06	**
hsa-miR-375	18.8754	24.6195	5.2303	45.1603	4.6602	33.852	24.4748	21.7727	40.0107	46.8977	50.0856	13.5027	215.143	21.9892	2.1573	619.951	17.9333	65.3311	69.8883	65.3311	67.7063	34.8485	132.977	103.482	186.554	28.4008	341.084	103.482	69.8883	142.03	37.8955	136.593	up	1.8498	5.64498e-06	**
hsa-miR-9-5p	4.6747	1.4525	0.7472	2.1587	0.2421	0.7146	9.214	124.123	24.7257	1.8617	12.256	0.6984	2.2841	114.196	0	3.6335	0.2612	1.0168	0.607	1.0168	1.456	1.4864	1.4245	0.6393	4.7219	0	1.699	0.6393	0.607	0	19.9566	1.2806	down	-3.962	5.89688e-06	**
hsa-miR-1284	0	0.1452	0	0.1727	0	0.0893	0	0.093	0.4496	0	0	0	0	0	0	0.6874	0.4353	0.7626	0.9538	0.7626	0.2427	0.0826	0.5865	0.1827	0	0	1.4442	0.1827	0.9538	0	0.0633	0.4851	up	2.938	7.0225e-06	**
hsa-miR-1307-5p	1.2348	1.0167	8.2191	3.1085	1.8156	8.7533	3.1673	4.5592	6.4736	1.1525	12.835	0.6984	7.7363	2.0326	13.4371	1.5712	0.1741	1.0168	0	1.0168	1.2943	0.8258	0.2514	0.548	0	0.1671	7.9006	0.548	0	0.0414	5.0827	1.0237	down	-2.3118	9.40746e-06	**
hsa-miR-125a-5p	22.0507	19.0275	11.5815	58.0262	2.1183	39.5685	3.6472	33.5895	52.0589	43.6175	37.0575	10.2434	43.3234	28.8262	10.91	54.7968	69.2087	72.2794	285.97	72.2794	46.27	46.6574	63.6815	27.3091	103.583	26.229	141.191	27.3091	285.97	8.8277	27.7098	88.7707	up	1.6797	1.57203e-05	**
hsa-miR-185-3p	14.9063	5.6647	61.6433	11.6571	7.2021	48.1431	17.8522	39.1722	27.2432	2.039	35.8995	23.9014	19.0092	2.587	39.0786	1.8658	1.4799	6.5246	0.607	6.5246	17.6344	4.8722	4.1896	2.466	0.4497	1.6706	15.9711	2.466	0.607	3.8543	23.7333	4.7455	down	-2.3223	1.6167e-05	**
hsa-miR-23a-5p	3.6163	1.0167	11.9551	1.4679	1.0894	8.3067	11.2296	15.8178	4.046	0.6206	28.0827	0.9312	3.905	0.8315	14.4233	1.7676	0.2612	0.2542	0	0.2542	2.0223	0.4129	0.8379	0.6393	0	0.6683	6.0316	0.6393	0	1.7821	7.156	1.0381	down	-2.7852	1.64694e-05	**
hsa-miR-361-3p	386.328	180.18	261.592	207.668	130.242	535.47	129.764	279.137	325.031	26.9506	81.3529	107.246	258.098	55.0655	273.982	178.63	34.909	58.3828	29.0479	58.3828	100.548	41.3723	73.8203	39.7307	35.9016	33.9139	299.457	39.7307	29.0479	26.483	215.874	71.9572	down	-1.585	1.7652e-05	**
hsa-miR-6780a-5p	0.0882	0.1452	1.6438	0.3454	0.2421	3.3941	0.5759	2.2331	1.3487	0.3546	0.965	0	4.126	0.1848	1.9108	0.5892	0	0.0847	0	0.0847	0.0809	0.0826	0.419	0.0913	0	0.1671	0.5947	0.0913	0	0	1.1705	0.1524	down	-2.9412	2.77218e-05	**
hsa-miR-6734-5p	0.3528	0	3.0635	1.4679	0.4237	1.965	0.7678	4.6523	2.9671	0	4.4392	0.0776	3.3156	0.0924	21.6966	0.2946	0.0871	0.0847	0.3468	0.0847	0.8089	0	0.1676	0.1827	0.8994	0.1671	1.1893	0.1827	0.3468	0	3.0188	0.3228	down	-3.2253	3.33424e-05	**
hsa-miR-4492	0	0	0.5978	0	0	0.1786	0.6719	0.5583	0.2697	0	3.9567	0.0776	0.9578	0.0924	0	1.6694	0	0.3389	13.8736	0.3389	0.1618	0.1652	0.2514	0.3653	28.1817	0	5.6069	0.3653	13.8736	0.8289	0.4907	4.4014	up	3.165	4.36367e-05	**
hsa-miR-192-5p	39.162	17.2119	53.6484	107.763	51.2012	291.36	22.1713	108.212	160.133	16.6668	32.7149	56.727	456.738	532.361	100.84	5578.87	35.1702	111.343	75.6979	111.343	45.7846	50.0431	157.109	56.0796	69.9295	29.6538	384.75	56.0796	75.6979	6786.45	136.461	908.267	up	2.7346	5.30577e-05	**
hsa-miR-151a-3p	2198.19	1397.72	2697.44	4788.29	4483.31	17011.6	1649.22	3586.73	7980.47	195.126	967.935	2916.12	9190.9	1277.04	5593.11	1149.46	986.072	793.294	486.443	793.294	2012.5	655.433	1419.51	1092.46	543.771	585.892	4454.31	1092.46	486.443	311.745	4395.55	1124.21	down	-1.9671	5.46931e-05	**
hsa-miR-200b-3p	1.4112	0.7262	0.8966	2.6768	0.4237	0.6252	0.2879	4.9314	5.3947	4.1667	10.8084	1.8624	2.6525	4.0652	0.3082	19.8369	0.9576	0.6779	18.9895	0.6779	1.7796	1.1561	4.1058	25.2084	5.2466	6.8496	10.6191	25.2084	18.9895	6.8798	2.7491	9.8122	up	1.8356	5.69386e-05	**
hsa-miR-589-5p	10.1433	3.3407	15.9899	4.6628	7.2626	39.5685	6.2387	17.6787	19.4209	1.3298	2.4126	7.6826	8.8415	5.3587	11.6496	2.4551	3.0469	3.22	1.9943	3.22	4.7726	1.7342	3.1841	1.644	0.7495	0.9189	19.7939	1.644	1.9943	0.5388	10.7721	3.394	down	-1.6662	6.71496e-05	**
hsa-miR-939-5p	2.2933	1.3799	11.3573	1.3816	1.2104	9.5572	3.7432	15.9108	2.9671	0.5319	11.87	0.5432	9.873	0.1848	25.7031	3.2407	1.2188	0.4237	0	0.4237	0.4853	0	1.2569	0.7307	0	0.1671	3.3981	0.7307	0	1.3262	6.5671	0.8935	down	-2.8777	6.72592e-05	**
hsa-miR-324-3p	2.2051	1.4525	7.7708	1.727	1.0894	9.1106	2.3035	8.9324	5.4846	1.2411	15.7302	2.0176	8.1784	0.462	4.4379	1.0802	0.3482	1.6947	0.3468	1.6947	2.3459	1.0735	1.0055	0.4567	0.2998	0.1671	7.4758	0.4567	0.3468	1.4091	4.8095	1.3468	down	-1.8364	9.77652e-05	**
hsa-miR-6513-3p	0	0	0	0	0.0605	0	0	0	0	0	0	0	0	0	0	0	0.0871	0.2542	0.1734	0.2542	0	0.1652	0	0.0913	0.1499	0	0.5947	0.0913	0.1734	0	0.004	0.1356	up	5.0832	0.000103652	**
hsa-miR-493-3p	7.0562	0.2905	44.0843	25.2138	3.5102	63.774	2.2075	6.048	15.4648	0.3546	3.3776	3.8801	6.4838	6.7446	125.557	3.4371	4.2657	4.4062	0.5203	4.4062	7.0376	3.138	1.2569	1.918	1.574	1.0024	11.9783	1.918	0.5203	2.4038	20.9365	3.3189	down	-2.6572	0.000105411	**
hsa-miR-455-5p	1.0584	0.5084	1.6438	1.1225	0	0.4466	0	1.8609	1.7982	0.6206	0.193	0.1552	1.7683	2.0326	0.1233	58.4303	0.1741	0.6779	4.5089	0.6779	0.2427	0	1.9272	0.6393	0.8994	0.6683	7.221	0.6393	4.5089	11.6459	0.8888	6.1907	up	2.8002	0.000108339	**
hsa-miR-4665-5p	10.1433	3.1955	33.3995	2.2451	1.9972	33.4054	9.7899	17.6787	4.5855	0.5319	33.1009	12.7267	10.4625	0.7391	50.0502	1.1784	2.2634	1.6947	0	1.6947	5.5006	1.569	2.011	2.8314	0.3748	2.4224	4.5025	2.8314	0	0.6631	14.9368	1.9692	down	-2.9232	0.000122571	**
hsa-miR-223-5p	166.351	49.1664	248.367	317.935	140.047	218.833	383.054	852.671	507.731	6.7377	23.6435	87.3021	194.661	56.2666	83.2731	95.2562	44.0498	51.0955	40.4936	51.0955	64.0661	39.8859	97.7847	47.1288	28.4815	24.5584	87.8409	47.1288	40.4936	5.8022	222.403	51.0108	down	-2.1243	0.000138539	**
hsa-miR-6772-5p	0	0	0.0747	0	0.0605	0.6252	0.192	0.3722	0	0	0.8685	0	0	0	1.356	0	0	0	0	0	0	0	0	0	0	0	0	0	0	0	0.2366	0	down	-4.5644	0.000167811	**
hsa-miR-377-5p	0.441	0	1.5691	0.7771	0	0.9825	0.096	0	0	0.0887	1.5441	0	0	0.0924	5.9173	0	0	0.1695	0	0.1695	0.0809	0.0826	0	0	0	0	0	0	0	0	0.7672	0.0335	down	-4.5174	0.000176033	**
hsa-miR-941	120.485	39.0717	48.3433	34.5394	24.3901	75.0283	65.1701	245.082	170.652	3.8121	11.3875	51.45	143.011	7.5761	83.0882	32.7995	8.7926	7.2873	7.8906	7.2873	11.8911	10.9005	15.669	7.1241	9.8186	8.0191	112.137	7.1241	7.8906	49.4847	74.8725	20.2744	down	-1.8848	0.000187672	**
hsa-miR-654-5p	19.4928	1.5977	50.286	28.8404	2.784	40.9083	4.607	5.3036	22.2981	2.7483	42.1723	11.7179	13.0412	5.0815	163.095	7.9544	7.4867	7.0331	0.3468	7.0331	13.0235	4.2115	1.4245	4.1101	1.6489	1.5871	15.3764	4.1101	0.3468	1.2019	27.5982	5.1263	down	-2.4286	0.000195002	**
hsa-miR-4646-5p	0.1764	0.0726	3.2876	0.4317	0.4237	3.1262	1.7276	5.0245	0.7193	0	6.4658	0	2.3577	0	2.0957	0.0982	0.0871	0.1695	0	0.1695	0.1618	0	0	0.1827	0	0	2.6335	0.1827	0	0	1.7273	0.2457	down	-2.8135	0.000207419	**
hsa-miR-7974	0	0	0	0	0	0	0	0	0	0	0	0	0	0	0	0	0	0	0.8671	0	0	0	0.0838	0.3653	0.075	0	0	0.3653	0.8671	0	0	0.1749	up	4.1285	0.00021703	**
hsa-miR-222-5p	0	0	1.0461	2.3314	0	0.0893	0.5759	2.3261	0.8991	0	0	0	0	0	0	0	0	0	0	0	0	0	0	0	0.075	0	0	0	0	0	0.4845	0.005	down	-6.5984	0.000218363	**
hsa-miR-429	0	0.0726	0	0.259	0.0605	0	0.2879	0.5583	1.3487	0	0.0965	0.2328	0	0.0924	0	0.1964	0	0.1695	1.8209	0.1695	0.0809	0	0.8379	3.1054	1.574	0.5847	0	3.1054	1.8209	0.0414	0.2006	0.9005	up	2.1664	0.000222207	**
hsa-miR-7110-5p	0	0	0.523	0	0	0.0893	0.6719	1.1165	0	0	0.579	0	0	0.1848	8.691	0	0	0	0	0	0	0	0	0	0	0	0.5947	0	0	0	0.7904	0.0396	down	-4.319	0.000227479	**
hsa-miR-99a-5p	622.359	430.152	411.777	693.724	148.822	1089.43	285.347	1165.68	916.56	102.217	143.019	240.954	1710.68	362.361	193.421	5911.09	149.648	393.173	1226.43	393.173	257.478	221.561	803.058	536.775	563.558	282.171	5962.13	536.775	1226.43	2911.43	567.767	1424.99	up	1.3276	0.000243472	**
hsa-miR-4785	0.3528	0.0726	0.8219	0	0.2421	0.8039	0	0	0	0	0	0.388	0	0.0924	0.9862	0	0	0	0	0	0	0.0826	0	0	0	0	0	0	0	0	0.2507	0.0055	down	-5.5104	0.000278816	**
hsa-miR-196a-5p	0	0.0726	0	0.0863	0.121	0.0893	0	0	0.0899	0.1773	0.0965	0	0	0.0924	0	0.5892	0	0.1695	0.9538	0.1695	0.4045	0.3303	0	1.0047	0.075	0	0.2549	1.0047	0.9538	0.1658	0.055	0.405	up	2.8804	0.000322809	**
hsa-miR-30c-2-3p	0	0.0726	0	0.5181	0.121	0.3573	0.2879	0.1861	0.8991	0.266	0	0.388	2.6525	1.2011	0.4931	2.0622	1.9152	0.4237	0.9538	0.4237	0.5662	0.4955	0.6703	0.6393	2.4734	0.4177	7.9855	0.6393	0.9538	2.2794	0.4962	1.5266	up	1.6213	0.000325651	**
hsa-miR-6516-5p	0	0.0726	0.2989	1.1225	0.2421	2.1437	0	1.5818	0.3596	0	0.6755	0.2328	1.6209	0.0924	0.3082	0	0	0.1695	0	0.1695	0.4045	0	0.0838	0	0	0	0	0	0	0	0.5834	0.0552	down	-3.4017	0.000347287	**
hsa-miR-4662a-5p	0	0	0	0	0	0	0	0	0.3596	0	0	0	0	0	0	0	0.0871	0.1695	0.607	0.1695	0	0	0	0.274	0	0	0	0.274	0.607	0.746	0.024	0.1956	up	3.0268	0.000384287	**
hsa-miR-659-5p	1.2348	0.1452	3.1382	1.1225	0.7868	8.0387	0.4799	1.6748	0.8092	0	1.7371	1.552	3.0208	0.5544	7.3349	0.6874	0.1741	0.1695	0	0.1695	0	0.1652	1.3407	0.274	0.8245	0.0835	2.8884	0.274	0	0	2.1086	0.4701	down	-2.1652	0.000412888	**
hsa-miR-4683	0.1764	0	0	0	0	0	0	0	0	0.0887	0	0	0	0	0.1849	0	0	0.3389	0.1734	0.3389	0	0.0826	0.419	0.0913	0.3748	0	2.2088	0.0913	0.1734	0.3316	0.03	0.3083	up	3.3613	0.000494304	**
hsa-miR-548ah-3p	0.1764	0.0726	0.0747	0.8635	0.121	0.6252	0	0.093	0.6294	0	0.193	0.1552	0.6631	0.7391	0.3082	0.3928	0	0.0847	0	0.0847	0.0809	0	0	0	0	0	0.085	0	0	0	0.3143	0.0485	down	-2.6961	0.000505051	**
hsa-miR-425-3p	16.6703	4.7206	51.4068	4.6628	22.2719	36.1744	7.2944	25.0293	18.4319	2.3936	19.2043	7.7602	3.5366	3.9728	14.9164	0.6874	2.6116	7.8804	0.2601	7.8804	11.2439	4.9548	0.0838	1.096	0.6746	1.253	8.5802	1.096	0.2601	0.0829	15.8964	3.243	down	-2.2933	0.00051431	**
hsa-miR-200a-3p	0.9702	0.2905	1.7185	1.727	0.5447	0.7146	0	2.8844	4.046	0.9752	2.0266	0.3104	10.0941	3.2337	0.1233	6.5795	0.4353	0.9321	6.2431	0.9321	1.6178	0.8258	7.2061	12.3302	3.073	4.1766	3.0583	12.3302	6.2431	0.0414	1.9773	4.4016	up	1.1545	0.000590384	**
hsa-miR-4485-3p	0	0	0	0	0	0.0893	0	0	0.3596	0.0887	0	0	0	0.1848	0	0	0	2.7963	0	2.7963	8.7363	5.3677	0	0	0	0	0	0	0	0	0.0482	1.3131	up	4.7678	0.00061337	**
hsa-miR-199a-5p	30.9592	15.6142	80.7714	68.129	69.9023	243.931	30.5215	129.613	190.972	11.6136	34.9345	31.7392	87.6783	75.8537	75.3835	7.5616	17.0628	34.1484	42.0544	34.1484	29.5254	26.3428	12.9039	8.7681	13.4912	11.0262	45.9593	8.7681	42.0544	6.9212	78.5078	22.7157	down	-1.7891	0.000625042	**
hsa-miR-20b-5p	0	0.0726	0	0.5181	0.3026	0.4466	0	1.2096	0.6294	0.4433	1.0615	0.2328	1.6946	1.0163	0.0616	0.491	0.2612	7.7109	0.7804	7.7109	2.5076	3.3858	1.8434	0	0.8994	0.1671	4.7573	0	0.7804	0.0414	0.5126	2.0891	up	2.027	0.000717539	**
hsa-miR-1306-3p	4.1455	0.7262	8.8916	1.8133	1.2104	9.9145	2.4955	7.2576	5.3947	0.1773	6.3693	1.0864	6.7785	0.2772	5.9789	1.964	0.1741	0.6779	0.9538	0.6779	2.1032	0.0826	0.3352	0.9133	2.0986	0.4177	6.0316	0.9133	0.9538	0.0829	4.1678	1.2253	down	-1.7662	0.000720373	**
hsa-miR-4481	0.0882	0	0.1494	0.0863	0	0	0	0	0.0899	0	0	0	0.0737	0	0	0	0	0	6.5033	0	0	0	0	0	0	0	0	0	6.5033	0	0.0325	0.8671	up	4.7377	0.000723573	**
hsa-miR-584-5p	18.9636	27.0161	13.6736	70.5468	24.5717	106.29	21.2115	22.1449	87.2143	28.0145	77.0102	17.6156	126.286	90.1744	16.7656	32.4067	57.1081	141.169	35.5511	141.169	322.596	264.419	85.9701	83.2974	19.8621	37.7564	194.711	83.2974	35.5511	11.7288	49.8333	103.106	up	1.049	0.000726507	**
hsa-miR-135b-5p	0	0	0	0	0	0	0	0.2791	0	0	0	0	0	0.0924	0	0	0	0	0.607	0	0	0.0826	0	0.9133	0	0.0835	0.085	0.9133	0.607	0.1658	0.0248	0.2305	up	3.2164	0.000767097	**
hsa-miR-200b-5p	0	0	0	0.3454	0	0.0893	0.096	0	0.0899	0	0	0	0	0	0	0.3928	0.0871	0.1695	0.2601	0.1695	0.1618	0.1652	0	0.0913	0	0.0835	0.7646	0.0913	0.2601	0	0.0414	0.1798	up	2.1187	0.000777331	**
hsa-miR-4654	0.3528	0.0726	1.3449	0.6044	0.3631	2.4116	0.192	0.9305	0.7193	0	4.5357	0.8536	0	0.2772	2.219	0.1964	0	0.1695	0	0.1695	0.2427	0.1652	0	0	0.8245	0	1.1893	0	0	0	0.9918	0.1971	down	-2.3311	0.000781172	**
hsa-miR-146a-3p	0.2646	0.0726	3.736	1.727	0.4842	5.1805	0.2879	0.6513	1.5285	0.0887	0	0.4656	0.0737	0.8315	3.9448	0.2946	0.2612	0	0.3468	0	0.6471	0.1652	0.1676	0.1827	0.2998	0.0835	0	0.1827	0.3468	0	1.2891	0.1985	down	-2.6992	0.00080668	**
hsa-miR-491-5p	0.1764	0.0726	0.7472	0.0863	0.1816	1.5184	0.4799	0	0.2697	0	3.6672	0.3104	0	0	2.219	0.2946	0.1741	0	0	0	0.2427	0.0826	0	0	0.075	0	0	0	0	0.0829	0.6486	0.0635	down	-3.3525	0.00082518	**
hsa-miR-4750-5p	0.441	0.5084	5.8281	0.6044	0.5447	3.1262	2.3035	2.4192	0.989	0	3.9567	0.4656	5.6733	0.3696	7.4582	0.2946	0.5223	0	0	0	0.3236	0.1652	0.2514	0.1827	0	0.1671	0.9345	0.1827	0	1.6578	2.3125	0.3121	down	-2.8894	0.000850763	**
hsa-let-7d-3p	17.9934	18.5191	16.8118	148.433	5.0838	7.5921	9.7899	24.5641	79.3021	96.7209	45.7429	2.9489	53.0491	10.9946	1.2944	93.9795	127.1	81.9393	218.856	81.9393	57.6757	62.7604	177.219	74.4379	108.155	33.2457	116.045	74.4379	218.856	7.4186	35.9227	102.271	up	1.5094	0.000876169	**
hsa-miR-3158-3p	9.7023	7.1171	46.9983	4.9219	2.5419	39.3898	9.9819	48.1977	28.9516	4.4327	22.4854	15.7532	158.337	3.5109	7.7664	9.1328	0.5223	2.2879	2.4279	2.2879	2.9121	1.4864	8.9657	2.0094	11.4675	0.4177	66.7726	2.0094	2.4279	9.6566	27.3392	8.3189	down	-1.7165	0.000965497	**
hsa-miR-6130	0	0	0	0.259	0	0.268	0	0.093	0	0	0.0965	0.1552	0.2947	0.3696	0	0.6874	0.2612	0.3389	0.3468	0.3389	0	0.3303	0.5027	0.0913	0.2249	0.1671	0.8495	0.0913	0.3468	0.0414	0.1024	0.3079	up	1.5882	0.000968763	**
hsa-miR-376b-3p	0	0.0726	0.2989	0	0	0.6252	0	0	0	0	0	0	0	0	14.4233	0	0	0	0	0	0	0.1652	0	0	0	0	0	0	0	0	1.028	0.011	down	-6.5462	0.00100443	**
hsa-miR-186-5p	39.8677	14.0164	77.6332	52.1545	51.8064	167.92	29.8496	105.142	228.016	20.3016	60.2185	25.6086	237.689	59.8699	54.4881	37.0222	5.7456	34.7416	16.4749	34.7416	54.6827	35.5091	40.1361	12.3302	18.0632	7.6849	121.652	12.3302	16.4749	7.2113	81.6388	30.32	down	-1.429	0.00109855	**
hsa-miR-1268a	0.6174	0.0726	1.1208	0	0.0605	0.0893	0.192	1.0235	0.7193	0	0.386	0.0776	0.221	0	0.7397	0.0982	0	0	0.6937	0	0.2427	0	0.2514	0.4567	1.1243	0	0.8495	0.4567	0.6937	18.1527	0.3546	1.5346	up	2.1136	0.00111338	**
hsa-miR-33a-5p	0.2646	0.0726	0	0	0.1816	1.0718	0.096	0.5583	0	0	0	0	0.6631	0	0.9862	0	0	0.0847	0	0.0847	0	0	0	0	0	0	0	0	0	0	0.2596	0.0113	down	-4.5219	0.00124216	**
hsa-miR-6785-5p	0	0.0726	0.2242	0.0863	0	0.7146	0	0.7444	0	0	1.6406	0	0	0	1.4177	0	0	0	0	0	0	0	0	0	0	0	0.3398	0	0	0	0.3267	0.0227	down	-3.8472	0.00124522	**
hsa-miR-2355-3p	0.6174	0.1452	8.7421	2.5041	1.271	11.7008	0.9598	3.3496	3.5965	0	6.2728	1.0864	2.063	0.3696	3.8832	0.2946	0.1741	1.0168	0.1734	1.0168	2.993	0.7432	0	0.0913	0	0.0835	1.6141	0.0913	0.1734	0	3.1041	0.5644	down	-2.4594	0.00134563	**
hsa-miR-145-5p	1.4112	0.2905	1.6438	0.259	0.2421	1.965	0.4799	2.1401	0.989	1.4185	1.158	1.3192	0.4421	0.1848	0.0616	0.2946	2.5246	0.4237	4.6823	0.4237	1.2134	0.5781	3.2679	0.9133	2.998	0.5847	7.0511	0.9133	4.6823	4.2688	0.9337	2.3213	up	1.3139	0.00138736	**
hsa-miR-4786-5p	0	0	0.8219	0	0.3026	1.0718	0.192	0.2791	0.2697	0	0	0	0	0	0.678	0	0	0	0	0	0	0.0826	0	0	0	0	0	0	0	0	0.241	0.0055	down	-5.4535	0.00146762	**
hsa-miR-548az-5p	0.1764	0	1.4197	0.0863	0.4237	0.8932	0.192	0.5583	0.2697	0	0	0.5432	1.6209	0.5544	0.4931	0.6874	0	0	0.1734	0	0.0809	0	0	0	0	0.0835	0.085	0	0.1734	0	0.4821	0.0856	down	-2.4936	0.00193586	**
hsa-miR-6741-5p	6.086	2.3966	26.8242	3.713	2.4814	22.0619	6.9105	12.0029	7.4627	0.8865	13.4141	4.0353	10.5361	0.3696	23.1759	1.3748	2.2634	0.5084	0.3468	0.5084	0.8089	0.6606	2.011	2.5574	0.075	1.0024	5.6069	2.5574	0.3468	7.8745	9.4904	1.9002	down	-2.3203	0.00211034	**
hsa-miR-665	0.1764	0	0.3736	0.0863	0	0.0893	0	0	0	0	0.965	0	0	0	1.4177	0	0	0	0	0	0.0809	0	0	0	0	0	0	0	0	0	0.2072	0.0054	down	-5.2619	0.00213559	**
hsa-miR-511-5p	1.4112	0.9441	1.2702	7.9441	0.4237	5.4485	0.4799	0.3722	4.7653	0.266	0	0.9312	12.5992	0.6467	0.3082	18.3638	0.8705	2.5421	3.0349	2.5421	2.8312	2.2296	14.4959	3.5621	3.2229	2.1718	31.3475	3.5621	3.0349	0	2.5207	6.2541	up	1.311	0.00222012	**
hsa-let-7b-3p	1.0584	1.2346	1.0461	3.5403	0.1816	0.1786	0	0.7444	1.7083	0.6206	1.158	0.1552	0.1474	0.2772	0	3.8299	2.2634	3.3047	2.2545	3.3047	0.6471	1.2387	3.0165	2.466	0.8245	0.7518	0.9345	2.466	2.2545	0	0.8034	1.9705	up	1.2944	0.00223865	**
hsa-miR-885-3p	0.7056	0	0	0.259	0	0.8039	0.096	0.093	0	0.0887	0	0.388	0.8842	0	0	9.1328	0.8705	0.0847	0	0.0847	0	0.0826	0.5865	0.274	0	0	0.3398	0.274	0	8.2889	0.2212	1.3346	up	2.593	0.00223986	**
hsa-miR-6842-3p	46.5711	18.2286	113.05	25.7319	16.4618	92.7135	51.0611	78.6236	45.5852	1.4185	6.0798	15.2876	50.544	5.7283	95.6008	12.8645	10.7948	11.6088	3.8152	11.6088	25.1573	6.3586	11.4794	15.0703	2.9231	8.2697	34.9155	15.0703	3.8152	13.2208	44.1791	12.4648	down	-1.8255	0.00231881	**
hsa-miR-155-5p	2.2051	3.8491	4.8567	8.4622	4.4786	2.5009	2.5914	11.4446	11.6885	5.3192	7.7203	2.1729	4.9365	14.5055	0.3698	20.1315	2.3505	36.7752	10.0584	36.7752	18.686	19.1584	10.7253	3.4707	7.4951	3.0907	15.6313	3.4707	10.0584	3.73	5.8068	13.4405	up	1.2108	0.00243277	**
hsa-miR-301a-5p	0.0882	0.2905	0	0.7771	0.0605	0.268	0.7678	1.3957	2.5175	0	4.3427	0	0	0	0	0	0.0871	0.1695	0	0.1695	0.1618	0.0826	0	0	0	0	0	0	0	0.0829	0.7005	0.0502	down	-3.8026	0.00256792	**
hsa-miR-548o-3p	0	0.7989	0.2242	4.7492	3.2076	7.5921	0.4799	2.3261	7.7324	0.3546	0.0965	1.3968	3.6103	2.9565	2.9586	0.6874	1.0447	0.4237	0.2601	0.4237	0.9707	0.5781	1.7596	0.4567	0.1499	0.4177	0.5097	0.4567	0.2601	0.0414	2.5656	0.5627	down	-2.1889	0.00265555	**
hsa-miR-1470	0	0	0	0	0	0	0	0	0	0	0	0	0	0	0	0	0	0	0.4336	0	0	0	0	0	1.499	0	0	0	0.4336	0	0	0.1577	up	3.9791	0.00268437	**
hsa-miR-4784	0	0.0726	0.4483	0	0	0.0893	0.096	0	0	0	0	0.1552	0.4421	0	0.0616	0	0	0	0	0	0	0	0	0	0	0	0	0	0	0	0.091	0	down	-3.1859	0.00295842	**
hsa-miR-6799-5p	0	0	0.1494	0	0	0.1786	0	0	0	0	0	0	0.6631	0	1.6026	0	0	0	0	0	0	0	0	0	0	0	0	0	0	0	0.1729	0	down	-4.1119	0.00306121	**
hsa-miR-10b-3p	0.2646	0.2905	0.2989	0.3454	0.0605	0.6252	0.2879	0	0.1798	0	0	0.388	3.1682	1.3859	0	1.964	0.1741	0.9321	1.9076	0.9321	1.7796	1.4864	0	0.7307	2.2485	0.3341	5.437	0.7307	1.9076	0.0414	0.4863	1.3737	up	1.4981	0.00310297	**
hsa-miR-550a-5p	1.5877	0.9441	1.1208	0.4317	0.6052	5.8058	1.4397	5.7688	4.3158	0.9752	1.3511	1.552	6.9995	1.0163	0.6164	0.7856	0.1741	0.7626	0.4336	0.7626	1.6178	0.7432	0	0.4567	0.4497	0.0835	4.3326	0.4567	0.4336	0.8289	2.302	0.8214	down	-1.4867	0.0031388	**
hsa-miR-574-5p	0.2646	0.2905	5.6039	0.8635	0.6657	3.3941	0.9598	1.3957	0.989	0	1.5441	1.0864	1.3999	0	3.2668	1.7676	0.0871	0	0.3468	0	0.2427	0.0826	0.8379	0.0913	0.2998	0.0835	1.6141	0.0913	0.3468	0.4973	1.4483	0.4259	down	-1.7658	0.00332252	**
hsa-miR-4638-5p	0.1764	0.2179	0.4483	0.4317	0.2421	1.3398	0.4799	0.4652	1.1689	0	4.3427	0.4656	0.4421	0.0924	2.5272	0	0.1741	0.0847	0	0.0847	0.6471	0.0826	0	0	0.8245	0.0835	0.5947	0	0	0	0.856	0.1717	down	-2.3177	0.00334131	**
hsa-miR-3913-5p	0	0	4.259	1.1225	1.3315	4.8232	0.6719	4.5592	2.5175	0.0887	0	1.164	7.0732	0.7391	3.1435	1.0802	0	0	0.3468	0	0.4045	0.1652	0.8379	0.0913	0	0	5.1821	0.0913	0.3468	0	2.0996	0.5697	down	-1.8818	0.00340551	**
hsa-miR-361-5p	0.2646	0.5084	0.4483	0.9498	0.3631	0.5359	0.8638	0.5583	3.3267	0.7092	3.7637	0.1552	0.8105	0.8315	0	1.2766	0.1741	6.6941	0.5203	6.6941	6.3095	5.2025	0.3352	1.1874	1.4241	0.1671	0.4248	1.1874	0.5203	0.1243	0.9393	2.1495	up	1.1943	0.00350353	**
hsa-miR-1292-5p	2.0287	1.743	7.0983	0.1727	1.392	12.4154	2.0156	5.7688	1.5285	1.5071	19.3008	4.5785	3.4629	0.462	20.7721	0.1964	1.1317	1.1016	0	1.1016	3.9637	1.2387	0.9217	1.096	1.1992	0.7518	5.437	1.096	0	1.8236	5.6164	1.4039	down	-2.0002	0.0036217	**
hsa-miR-1287-5p	0.7056	0.2905	12.4781	0.7771	1.0289	10.4504	2.0156	6.6062	4.5855	0.9752	6.2728	2.0953	2.5051	0.2772	14.7315	1.1784	0.0871	1.0168	0	1.0168	4.0446	0.6606	0.3352	0.3653	1.3491	0	8.4103	0.3653	0	1.2848	4.3863	1.341	down	-1.7097	0.00372469	**
hsa-miR-766-5p	2.8225	1.2346	20.6972	7.5987	3.5102	27.8676	7.5824	11.8168	8.7214	0.5319	12.063	2.9489	6.3364	0.8315	21.8199	2.5533	1.654	2.3726	0.1734	2.3726	4.6917	1.8167	2.7651	3.3794	2.1736	1.5036	8.3253	3.3794	0.1734	0.9532	9.0922	2.5525	down	-1.8327	0.00383464	**
hsa-miR-204-5p	0.441	0.3631	0	1.2089	0	0.3573	0.096	0.3722	0.0899	0.1773	0.965	1.3968	1.0315	1.3859	0.2466	5.4011	0.3482	1.3558	1.5608	1.3558	0.6471	1.2387	1.4245	0.822	0	0.5012	4.8423	0.822	1.5608	1.119	0.5421	1.5333	up	1.5	0.0039803	**
hsa-miR-7855-5p	0.2646	0	0.3736	0.259	0.0605	0.268	0.192	0.3722	0	0	0.4825	0.1552	0	0	0	0	0	0	0	0	0	0	0	0	0	0.0835	0.085	0	0	0	0.1618	0.0112	down	-3.8526	0.00405095	**
hsa-miR-431-5p	1.1466	0.0726	7.8455	2.9359	0.121	1.965	0.192	0.9305	2.5175	0	0	0.0776	1.3999	0.0924	5.9789	1.1784	0.0871	0.6779	0	0.6779	0.6471	0.1652	0.0838	0	0	0	1.3592	0	0	0	1.685	0.3251	down	-2.3738	0.00430963	**
hsa-miR-376a-3p	0	0	0	0.1727	0	1.1612	0	0.6513	0	0	4.0532	0	0.1474	0.1848	9.4306	0	0	0.2542	0	0.2542	0.0809	0.3303	0	0	0	0	0	0	0	0	1.0534	0.0613	down	-4.103	0.004394	**
hsa-miR-139-3p	63.3296	15.0332	72.4776	35.7483	5.8706	101.288	19.1959	44.1037	42.0787	24.3797	134.913	86.8365	77.5106	7.8533	178.381	22.9793	16.8887	17.1166	6.4165	17.1166	50.5572	17.4243	23.6292	16.9883	24.8089	10.1909	71.6149	16.9883	6.4165	22.0899	60.6	22.7484	down	-1.4136	0.00468584	**
hsa-miR-141-3p	0.1764	0	0	0	0	0.0893	0	0.4652	0	0	0	0	0	0.1848	0	0	0	0.0847	1.9076	0.0847	0.1618	0	0	0.548	0	0	0	0.548	1.9076	0	0.061	0.3495	up	2.5184	0.00502998	**
hsa-miR-1910-3p	0.441	0	0.2989	0.0863	0	0	0.4799	1.3026	0.0899	0	0	0	0	0	0	0.0982	0	0	0	0	0	0	0	0	0	0	0	0	0	0	0.1799	0.0065	down	-4.7906	0.00514406	**
hsa-miR-6738-3p	0	0	0	0	0	0.0893	0	0	0	0	0	0	0	0	0	0	0.3482	0.0847	0	0.0847	0.0809	0	0	0	0	0.0835	0.2549	0	0	0	0.006	0.0625	up	3.3808	0.00521132	**
hsa-miR-1273h-3p	20.6395	8.5696	13.8978	15.1973	4.3575	52.4305	21.0195	49.5934	28.1424	3.4575	27.7932	13.0371	36.8396	4.5272	101.087	12.8645	7.8349	8.982	3.295	8.982	25.4	7.267	7.2061	8.8595	2.7732	4.4272	19.9638	8.8595	3.295	4.849	26.7059	8.9906	down	-1.5707	0.00523003	**
hsa-miR-744-5p	274.663	175.459	241.193	337.364	126.369	1932.42	388.909	896.03	532.547	47.4296	1027.77	242.04	675.86	55.2503	1724.33	107.139	151.998	169.302	42.4012	169.302	395.317	160.204	113.621	187.145	57.3377	95.7275	651.161	187.145	42.4012	144.31	578.509	178.301	down	-1.698	0.00523542	**
hsa-miR-4433a-3p	0	0.3631	0.0747	0.3454	0.3026	1.0718	0.7678	0.9305	0.5395	0	5.5972	0	1.9157	0	6.1022	0.0982	0.6094	0	0.1734	0	0.1618	0.0826	0.0838	0.274	0	0	0.085	0.274	0.1734	0.0829	1.2007	0.1399	down	-3.1014	0.00525155	**
hsa-miR-28-3p	260.551	97.0983	703.854	173.302	134.66	879.349	124.965	372.741	380.416	13.9186	125.359	258.259	337.156	99.2288	482.442	191.2	55.367	121.087	38.7594	121.087	230.137	95.5444	77.5909	83.9367	45.7202	37.0881	364.446	83.9367	38.7594	121.391	296.22	113.737	down	-1.381	0.00540708	**
hsa-miR-6825-5p	0	0	0	0.6908	0	0	0	0	0	0	1.4476	0	0	0	0.5547	0	0	0	0	0	0	0	0	0	0	0	0	0	0	0	0.1795	0	down	-4.1659	0.00549601	**
hsa-miR-4741	0.5292	0	0.3736	0.0863	0.121	0.8932	0.2879	0	0	0	0.8685	0.6984	0	0	0.678	0	0.2612	0	0	0	0	0	0	0	0.075	0	0	0	0	0	0.3024	0.0224	down	-3.7549	0.00550732	**
hsa-miR-371b-5p	0	0	0	0	0	0	0	0	0	0	0	0	0	0	0	0	0	0.1695	0	0.1695	0	0.0826	0	0.274	0	0	0	0.274	0	0	0	0.0646	up	2.6915	0.00552899	**
hsa-miR-1908-5p	25.4024	4.7932	78.0815	36.5254	3.9944	49.3043	32.0571	106.444	32.8178	2.3936	65.0437	7.993	74.195	1.2011	110.086	16.3016	9.8372	7.8804	3.3817	7.8804	21.5981	6.0283	5.3627	15.9836	6.5208	5.346	25.061	15.9836	3.3817	13.6767	42.0222	10.9483	down	-1.9404	0.00557561	**
hsa-miR-338-3p	0.2646	0	1.1955	0.1727	0.0605	0.8932	0.2879	1.0235	0.4496	0	0	0	0	0	1.9108	0.5892	0	0.0847	0	0.0847	0	0.0826	0	0	0	0	0	0	0	0	0.4172	0.0561	down	-2.8947	0.00581589	**
hsa-miR-6770-3p	0.3528	0.2905	0.5978	0.3454	0	1.5184	0.096	0.4652	0.4496	0	0.8685	0.2328	0	0	1.2944	0	0.2612	0	0	0	0.2427	0	0	0	0	0	0.7646	0	0	0	0.4341	0.0846	down	-2.3593	0.00585418	**
hsa-miR-223-3p	13.6714	11.6198	12.4781	18.824	25.6611	41.5335	6.8145	21.2144	38.3923	2.039	22.2924	5.2769	8.8415	18.386	3.5134	1.7676	2.0893	17.2861	2.3412	17.2861	8.5745	7.9276	3.8544	1.7354	3.2979	1.1694	11.3836	1.7354	2.3412	0.0414	16.7039	5.5221	down	-1.5969	0.00595015	**
hsa-miR-3188	0.441	0.3631	0.2989	0.0863	0.121	0.5359	0.096	0.8374	0.2697	0.0887	1.6406	0.1552	0.7368	0	0.8629	0	0	0.1695	0	0.1695	0	0.3303	0	0	0	0.1671	0	0	0	0	0.4356	0.0558	down	-2.9647	0.00616095	**
hsa-miR-664b-5p	1.0584	0	1.1208	1.0362	0.3631	4.8232	1.3437	4.6523	0.3596	0.1773	0	0.388	1.1052	0.0924	2.897	0.8838	0.2612	0	0	0	0.2427	0.0826	0.5865	0.0913	0.8994	0.2506	1.0194	0.0913	0	0	1.2945	0.2939	down	-2.139	0.00625162	**
hsa-miR-3148	0.1764	0	0	0.259	0	0	0	0	0.3596	0	0	0.0776	0.8105	0	0	0	0	0	0	0	0	0	0	0	0	0	0	0	0	0	0.1122	0	down	-3.488	0.00633347	**
hsa-miR-4461	0	0	0	0	0	0	0	0	0	0	0	0	0	0	0	0	0	0.3389	0	0.3389	0	0.0826	0	0.0913	0	0	0	0.0913	0	0	0	0.0629	up	2.6531	0.00652325	**
hsa-miR-6745	0	0	0	0	0	0	0	0	0	0	0	0	0	0	0	0	0	0	0	0	0.1618	0.0826	0.3352	0	0	0	0	0	0	0.4973	0	0.0718	up	2.844	0.00686028	**
hsa-miR-7641	2.3815	1.743	1.4944	4.0584	1.9972	1.3398	1.4397	16.8413	15.8245	4.9646	0.6755	3.2593	17.0199	3.0489	0.1849	10.9004	2.0893	2.4573	35.898	2.4573	2.7503	1.8993	22.6237	1.0047	12.5169	1.9212	42.2214	1.0047	35.898	2.1551	5.0849	11.8532	up	1.221	0.00710524	**
hsa-miR-381-3p	8.7321	2.6145	10.386	85.4851	5.7495	27.2424	5.3749	9.6768	34.5261	1.2411	7.7203	1.94	19.0829	22.636	87.218	9.8202	11.4913	5.1689	3.8152	5.1689	6.7949	3.0554	5.3627	5.5714	8.0947	3.8425	25.9105	5.5714	3.8152	3.1912	21.975	7.1116	down	-1.6276	0.0071802	**
hsa-miR-335-5p	0	0.2179	0.523	1.4679	0.9078	3.1262	0	1.5818	1.9781	0.3546	2.0266	1.0864	0.1474	5.4511	0.5547	0.0982	2.0023	10.3377	1.2139	10.3377	11.972	7.6799	2.5975	1.5527	0.2998	0.6683	2.7185	1.5527	1.2139	0.0414	1.2949	3.6191	up	1.4828	0.00718463	**
hsa-miR-3198	0.2646	0.0726	1.7185	0.8635	0.2421	5.7164	2.8794	4.4662	0.5395	0	8.8784	1.3968	1.9157	0.1848	3.4517	0.5892	0.3482	0.1695	0.607	0.1695	0.728	0.1652	0	0.822	0	0.2506	1.1893	0.822	0.607	0	2.1727	0.4312	down	-2.3331	0.00735005	**
hsa-miR-365b-5p	0.1764	0	0.1494	0.1727	0	0.3573	0.192	1.1165	0.2697	0	0	0.388	0	0.0924	0	2.3569	0.0871	0.1695	0.2601	0.1695	0.1618	0	0.5027	0.1827	1.8738	0.0835	2.8884	0.1827	0.2601	0	0.1943	0.6119	up	1.655	0.00745846	**
hsa-miR-4754	0	0	0.2242	0.1727	0	0.0893	0.3839	0.1861	0	0	0	0	0	0.0924	0.3698	0	0	0	0	0	0.0809	0	0	0	0	0	0	0	0	0	0.1012	0.0054	down	-4.2281	0.00778035	**
hsa-miR-1268b	0.441	0	1.7933	0	0.1816	0.0893	0.192	1.2096	0.6294	0	0.386	0	0	0	0.6164	0.2946	0	0	0.3468	0	0	0	0.1676	0.274	1.2742	0	1.1893	0.274	0.3468	14.7542	0.3692	1.2614	up	1.7726	0.00795909	**
hsa-miR-365a-5p	0	0	0.1494	0.1727	0	0.0893	0.2879	0.6513	0	0	0	0	0	0.2772	0.4315	5.6957	0	0	0	0	0	0	0.419	0.3653	0	0	1.9539	0.3653	0	4.2688	0.1373	0.8712	up	2.6657	0.00832661	**
hsa-miR-539-5p	0	0	0	0	0	0.1786	0	0	0	0	0	0	0	0.0924	0	0	0	0.1695	0	0.1695	0.3236	0.1652	1.3407	0	0	0	0.085	0	0	0	0.0181	0.1502	up	3.0528	0.00881709	**
hsa-miR-3195	0	0	0	0	0	0	0.096	0	0.1798	0	0.579	0.0776	0	0	0.1233	0.5892	0	0.1695	1.4741	0.1695	0.1618	0.0826	0	0	0.075	0	0	0	1.4741	0.0414	0.0704	0.2825	up	2.0046	0.00885465	**
hsa-miR-4479	0	0	0.2242	0.0863	0.121	0.3573	0	1.0235	0	0	0.0965	0	0.5894	0.1848	0.5547	0.0982	0	0	0	0	0	0	0	0.0913	0	0	0.085	0.0913	0	0	0.2158	0.0244	down	-3.1447	0.00931814	**
hsa-miR-625-3p	18.699	23.0944	6.2764	46.0238	21.3641	12.862	4.1271	10.6072	19.331	26.9506	36.189	5.1217	10.6835	10.9946	0.6164	29.2643	31.0786	68.0426	15.8679	68.0426	72.4789	82.9097	27.735	43.4754	16.939	11.4439	21.8328	43.4754	15.8679	3.4813	16.8627	36.7957	up	1.1257	0.00937582	**
hsa-miR-10b-5p	141.301	171.102	79.5759	416.891	70.9917	115.669	45.5902	150.92	433.644	166.58	60.0255	183.839	684.554	1954.92	5.2392	1139.34	324.889	577.642	2247.7	577.642	166.07	416.696	1121.63	430.187	473.767	279.414	2367.71	430.187	2247.7	118.448	312.056	861.268	up	1.4647	0.00975982	**
hsa-miR-517b-3p	0	0	0.0747	0	0	0	0	0	0	0	3.9567	0	0	0	0	0	0	0	0	0	0	0	0	0	0	0	0	0	0	0	0.2688	0	down	-4.7485	0.00999166	**
hsa-miR-517a-3p	0	0	0.0747	0	0	0	0	0	0	0	3.9567	0	0	0	0	0	0	0	0	0	0	0	0	0	0	0	0	0	0	0	0.2688	0	down	-4.7485	0.0100273	*
hsa-miR-6818-3p	0	0	0	0	0	0.0893	0	0	0	0	0	0	0	0	0	0	0	0.2542	0	0.2542	0	0	0	0.0913	0	0	0.1699	0.0913	0	0	0.006	0.0574	up	3.258	0.0100735	*
hsa-miR-142-3p	5.9978	3.486	24.1343	37.1299	1.7551	85.568	9.118	50.2447	66.8943	1.5071	11.87	2.3281	17.7567	50.1687	21.1419	11.8825	5.8327	9.8293	5.1159	9.8293	6.714	8.6708	19.0207	4.2927	4.647	2.2554	33.6412	4.2927	5.1159	0.7874	25.94	8.7952	down	-1.5604	0.0101207	*
hsa-miR-193a-5p	93.5832	33.407	118.803	36.8708	5.5075	49.1257	157.502	543.201	33.9866	23.3159	204.106	26.307	185.156	4.712	16.8272	80.5258	3.4822	28.3864	7.7172	28.3864	20.9509	20.6449	15.7528	9.4075	16.4143	7.3508	113.751	9.4075	7.7172	87.7794	102.161	30.5116	down	-1.7434	0.0101218	*
hsa-miR-5010-5p	0.0882	0.2905	0.8219	0.9498	0.1816	2.1437	2.2075	6.9784	1.8881	0.6206	4.5357	0.4656	2.3577	0.0924	1.4793	0.0982	0.3482	0.3389	0.607	0.3389	0.728	0.1652	1.6758	0.1827	0	0.3341	0.8495	0.1827	0.607	0	1.6734	0.4304	down	-1.959	0.0108504	*
hsa-miR-345-5p	9.3495	4.2122	13.823	1.986	3.0866	20.4541	6.4306	21.3075	16.4538	1.1525	13.1245	5.6649	18.1988	1.2011	8.013	8.74	0.5223	3.3894	2.1678	3.3894	6.4713	3.4683	1.3407	1.2787	1.6489	0.6683	15.8861	1.2787	2.1678	6.8798	9.6305	3.9532	down	-1.2846	0.0113021	*
hsa-miR-374c-5p	0	0	0	0.0863	0.121	0	0	0.5583	0.8991	0	0	0	0	0	0	0	0	0	0	0	0	0	0	0	0	0	0.085	0	0	0	0.111	0.0057	down	-4.2835	0.011309	*
hsa-miR-1303	0	0.2179	0	0	0.0605	0.0893	0	0.4652	0	0	0	0	0.3684	0.7391	0	3.6335	0	0.4237	0.4336	0.4237	0	0.4955	0	0.4567	0	0	0.5947	0.4567	0.4336	1.2848	0.1294	0.5758	up	2.1537	0.0114967	*
hsa-miR-4437	0	0.2179	0	0	0.0605	0.0893	0.2879	0.2791	0	0	0	0	0	0	0	0	0	0	0	0	0	0	0	0	0	0	0	0	0	0	0.0623	0	down	-2.6392	0.0117566	*
hsa-miR-4525	0.2646	0	0.3736	0	0	0	0	0.1861	0	0.0887	0	0	2.2841	0	0.1233	0.0982	0	0	0	0	0	0	0	0	0	0	0.3398	0	0	0	0.2214	0.0292	down	-2.9226	0.0120983	*
hsa-miR-6724-5p	0	0	0	0	0	0	0	0.1861	0	0	0	0	0	0	0	0	0	0	0	0	0	0	0	0.1827	0	0.1671	0	0.1827	0	0.746	0.0124	0.0852	up	2.7805	0.0121017	*
hsa-miR-3611	0	0	0	0	0	0	0	0.1861	0	0	0.2895	0.1552	0	0	0.678	0	0	0	0	0	0	0	0	0	0	0	0	0	0	0	0.0873	0	down	-3.126	0.0121784	*
hsa-miR-200a-5p	0.7056	0.2179	0.4483	0.1727	0.0605	0.1786	0	0.093	0.8092	0.3546	0.4825	0	0.0737	0.2772	0.0616	2.0622	0	0.0847	0.7804	0.0847	0	0	2.2624	1.918	0	0.1671	3.3981	1.918	0.7804	0	0.2624	0.8971	up	1.7735	0.0122084	*
hsa-miR-3679-5p	0.441	0.0726	1.4197	0.6908	0.7868	0	1.9196	1.1165	2.068	0	2.8951	0.2328	1.3262	0.0924	1.4177	0	0	0.0847	0.0867	0.0847	1.2943	0	0.5865	0	0	0.3341	1.2743	0	0.0867	0	0.9653	0.2555	down	-1.9177	0.0128408	*
hsa-miR-4435	0	0	0.1494	1.1225	0.2421	3.7514	0.096	0.8374	0.2697	0	0.579	0.6208	0.8105	0.1848	0.9246	0	0.3482	0	0	0	0.728	0.1652	0	0	0	0	0.1699	0	0	0	0.6392	0.0941	down	-2.764	0.0130809	*
hsa-miR-1228-5p	4.9394	1.6704	0.8966	32.2944	0.4237	8.396	5.9507	9.6768	2.6974	1.0638	41.7862	1.3968	91.5833	0.1848	4.3763	19.0512	0.7835	0.5084	0.1734	0.5084	0.1618	0.0826	0.3352	1.0047	12.8916	0	5.1821	1.0047	0.1734	1.6163	13.8224	2.8985	down	-2.2536	0.013815	*
hsa-miR-4523	0.5292	0	0.2242	0	0	0.268	0	0	0	0	0.386	0	0	0	0	0	0	0	0	0	0	0	0	0	0	0	0	0	0	0	0.0938	0	down	-3.2296	0.0142933	*
hsa-miR-548am-3p	0	0	0.0747	0.1727	0	0.3573	0	0	0.4496	0	0	0.0776	0.8105	0.3696	0.2466	0	0	0	0	0	0.2427	0	0	0	0	0	0	0	0	0	0.1706	0.0162	down	-3.3966	0.0143855	*
hsa-miR-758-3p	0.3528	0	2.3163	0.6044	0.1816	1.6971	0	0.3722	0.8092	0.1773	0	0	0.0737	0.6467	4.3147	0.0982	0.5223	0.0847	0	0.0847	0.2427	0.0826	0.5027	0	0	0	1.1044	0	0	0	0.7697	0.1815	down	-2.0843	0.0147813	*
hsa-miR-134-5p	110.783	14.8879	1473.84	127.105	18.8827	528.145	90.9885	135.288	152.22	15.2484	798.474	181.588	137.854	23.0979	2716.39	104.193	47.3579	115.918	8.4976	115.918	306.903	101.573	31.757	28.7705	33.4282	36.5034	252.394	28.7705	8.4976	444.534	434.986	111.001	down	-1.9704	0.0147981	*
hsa-miR-154-5p	0	0	0	0.0863	0.0605	0.0893	0	0	0.8092	0	0	0	0	0	0.2466	0	0	0	0	0	0	0	0	0	0	0	0	0	0	0	0.0861	0	down	-3.106	0.0151537	*
hsa-miR-1537-3p	0	0	0	0	0	0.268	0	0.1861	0.4496	0	0	0	0	0	0.4931	0	0	0	0	0	0	0	0	0	0	0	0	0	0	0	0.0931	0	down	-3.2188	0.0151953	*
hsa-miR-379-5p	1.323	0.4357	3.5118	10.1891	0.5447	20.4541	1.3437	3.6288	7.1929	1.1525	2.4126	9.8554	5.5996	27.0708	14.485	1.3748	3.0469	6.5246	0.3468	6.5246	4.8535	2.2296	0.419	0.548	0.4497	0.9189	3.9928	0.548	0.3468	0	7.28	2.1416	down	-1.7652	0.0155669	*
hsa-miR-942-3p	0	0	0.1494	0	0	0	0	0.093	0.1798	0	0	0	0	0	0	0	0	0.5931	0	0.5931	0	0.0826	0.419	0	0	0	0.8495	0	0	0	0.0281	0.1692	up	2.5901	0.0158316	*
hsa-miR-339-3p	11.731	5.3015	31.0832	8.9803	6.1127	57.611	12.4773	34.1478	21.5788	2.3936	63.6926	8.4586	51.5018	2.0326	41.7907	8.8382	2.1764	8.0499	2.3412	8.0499	15.8548	5.5328	10.4739	5.5714	3.9724	3.8425	33.3863	5.5714	2.3412	15.8732	23.9262	8.7917	down	-1.4444	0.0159189	*
hsa-miR-517c-3p	0	0	0	0	0	0	0	0	0	0	3.8602	0	0	0	0	0	0	0	0	0	0	0	0	0	0	0	0	0	0	0	0.2573	0	down	-4.6854	0.0159768	*
hsa-miR-193b-3p	0	0	0.1494	0.0863	0	0.1786	0	0.093	0.0899	0.5319	0	0.2328	0	0.0924	0	0	0.4353	0.3389	0	0.3389	0	0.1652	0.1676	0.3653	0.5996	0	1.1044	0.3653	0	2.4038	0.097	0.419	up	2.1109	0.0163852	*
hsa-miR-4742-5p	0	0	0	0	0	0	0	0	0	0	0	0	0	0	0	0	0	0.0847	0	0.0847	0.1618	0.0826	0	0.0913	0	0	0	0.0913	0	0	0	0.0398	up	1.9928	0.0169319	*
hsa-miR-200c-3p	1.4994	1.2346	0	3.2812	0.9683	1.0718	2.1115	5.8619	1.7982	3.1029	9.2644	0.1552	2.5788	2.4022	0	0.1964	0.6964	3.22	15.8679	3.22	5.6624	2.56	0.419	12.5129	1.2742	0.1671	2.5486	12.5129	15.8679	0	2.3554	5.115	up	1.1188	0.0178629	*
hsa-miR-6511b-3p	0	0	0	0	0	0	0	0	0	0	0	0	0	0	0	0.0982	0	0.3389	0	0.3389	0.0809	0	0	0	0	0	0	0	0	0	0	0.0571	up	2.5135	0.0179413	*
hsa-miR-6513-5p	0	0	0	0	0.0605	0.4466	0	0	0	0	1.5441	0	0	0	0	0	0	0	0	0	0	0	0	0	0	0	0	0	0	0	0.1367	0	down	-3.7729	0.0184386	*
hsa-miR-4421	0	0	0	0	0	0.1786	0	0	0	0	0	0	1.4736	0	0.3698	0	0	0	0	0	0	0	0	0	0	0	0	0	0	0	0.1348	0	down	-3.7527	0.0184405	*
hsa-miR-1538	0.441	0.3631	1.0461	0.7771	0	1.3398	0.192	0.4652	0.0899	0	0.0965	0.2328	0.8842	0	1.9108	0.3928	0.4353	0.0847	0	0.0847	0.3236	0	0	0	0	0.0835	0.2549	0	0	0	0.5226	0.1106	down	-2.2404	0.018929	*
hsa-miR-4446-3p	24.9614	18.9549	30.4107	31.5172	8.7756	94.7679	48.5656	34.7991	27.2432	5.5852	29.2407	15.4428	44.6496	3.5109	36.2432	5.0083	12.1877	8.982	3.0349	8.982	19.5758	5.2851	10.2226	20.6417	5.0217	5.4296	23.7867	20.6417	3.0349	6.5897	30.3112	10.5616	down	-1.521	0.0191537	*
hsa-miR-485-5p	36.3396	4.6479	119.102	64.5024	2.0577	46.2674	11.7095	15.9108	54.0369	6.0284	50.3751	11.5627	27.114	1.1087	245.197	19.5422	22.0249	14.0661	1.5608	14.0661	21.4363	9.4966	11.3119	9.7728	10.9429	8.1026	50.8865	9.7728	1.5608	18.1527	46.3973	14.8464	down	-1.6439	0.0192044	*
hsa-miR-15a-3p	0	0	0	0	0	0	0	0	0.1798	0	0	0	0	0	0	0	0	0	1.0405	0	0	0	0	0	0	0	0	0	1.0405	0	0.012	0.1387	up	3.5309	0.0192254	*
hsa-miR-615-3p	0	0.581	0.3736	0.6044	0	0	0	0.2791	0.2697	0.8865	0	0	4.0524	0	0.0616	0.982	0.6094	0.4237	2.5146	0.4237	0.728	0.1652	1.0055	1.4614	3.4478	0	1.6141	1.4614	2.5146	0.0414	0.4739	1.1595	up	1.2908	0.0193651	*
hsa-miR-1290	2.0287	0.1452	0.523	1.2089	0.2421	0.4466	29.8496	3.8149	0.3596	0.1773	0.2895	2.4057	5.4523	1.2935	0.1849	3.5353	0.1741	0.9321	1.4741	0.9321	0.8089	1.4038	1.0055	0.3653	1.1243	0.1671	5.352	0.3653	1.4741	0.5388	3.2281	1.3102	down	-1.3009	0.0198728	*
hsa-miR-548av-3p	0	0.0726	0	0.3454	0.121	0.268	0	0.093	0.0899	0	0	0.1552	0.1474	0	0.0616	0	0	0.0847	0	0.0847	0	0	0	0	0	0	0	0	0	0	0.0903	0.0113	down	-2.9984	0.0202303	*
hsa-miR-449a	0	0	0	0	0.0605	0	0	0.4652	0.5395	0	1.5441	0	0	0	0	0	0	0	0	0	0	0	0	0	0	0	0	0	0	0.0414	0.174	0.0028	down	-5.9575	0.0205112	*
hsa-miR-6500-3p	0	0	0.2989	0.3454	0	0.0893	0	0	0.0899	0	0	0	0.4421	0	0.3082	0	0	0	0	0	0	0	0.0838	0	0	0	0	0	0	0	0.1049	0.0056	down	-4.2274	0.0205152	*
hsa-miR-206	1.8523	0.7989	0.523	1.6406	1.0894	1.2505	0.3839	3.4427	4.2258	23.2272	18.2393	6.6738	73.5319	0.9239	0.9246	16.5962	3.0469	3.6436	44.1354	3.6436	131.206	2.2296	14.077	4.2014	50.2173	2.4224	19.709	4.2014	44.1354	3.6471	9.2485	23.1408	up	1.3231	0.0212317	*
hsa-miR-1973	0	0	0	0	0	0	0	0	0	0	0	0	0	0	0	0	0	0.0847	0	0.0847	0.4045	0.1652	0	0	0	0	0	0	0	0	0	0.0493	up	2.3016	0.021585	*
hsa-miR-27b-5p	0.9702	0.1452	2.9888	2.4178	0.3026	9.1999	1.0558	2.9775	5.0351	0.5319	0	3.4145	2.2104	2.3098	5.4858	1.1784	0.6094	1.1016	0.4336	1.1016	1.7796	0.991	1.5082	0	0	0.2506	3.7379	0	0.4336	0.9947	2.603	0.9413	down	-1.4674	0.0232466	*
hsa-miR-4632-5p	0	0	0.0747	0	0	0	0.4799	0	0	0	0.4825	0.0776	0	0	0	0	0	0	0	0	0	0	0	0	0	0	0	0	0	0	0.0743	0	down	-2.8934	0.0237805	*
hsa-miR-4478	0	0	0	0	0	0	0	0	0	0	0	0	0	0	0	0	0	0	0	0	0	0	0	0	0	0	0.3398	0	0	0.6631	0	0.0669	up	2.742	0.0249042	*
hsa-miR-582-3p	2.0287	0.3631	0.523	7.426	1.0289	1.1612	3.8392	14.236	7.4627	0.3546	1.8336	0.4656	7.6626	1.4783	0.4315	0.3928	0	0.3389	2.4279	0.3389	0	1.0735	1.6758	0.548	0.6746	0.6683	1.699	0.548	2.4279	0.0414	3.353	0.857	down	-1.9681	0.0252001	*
hsa-miR-191-3p	2.0287	0.6536	10.0871	2.5041	0.6657	6.2524	1.7276	2.4192	5.6644	0.7979	4.6322	1.3192	2.6525	0.1848	3.575	1.5712	0.5223	1.1016	0	1.1016	4.2064	1.6516	0	0.274	0.8245	0.4177	2.2937	0.274	0	0	3.011	0.9492	down	-1.6655	0.025303	*
hsa-miR-329-5p	0	0	0.2989	0.1727	0	0.1786	0	0	0.2697	0.0887	0.965	0	0	0.3696	0.9862	0.2946	0	0.0847	0	0.0847	0	0.0826	0	0	0	0	0	0	0	0	0.222	0.0364	down	-2.6085	0.0262421	*
hsa-miR-4326	3.1753	0.7262	1.5691	4.5765	0.4842	3.5728	2.1115	2.9775	0	1.3298	0.772	0.776	3.7576	0.462	0.678	0.2946	0.4353	0.5084	0.607	0.5084	1.2134	0.5781	0.3352	0.0913	0	0.4177	2.8034	0.0913	0.607	1.7821	1.7979	0.6849	down	-1.3923	0.0267319	*
hsa-miR-2277-5p	0	0	0.3736	0.4317	0.0605	0.5359	0.096	0.2791	0	0	0	0.0776	0	0.1848	0.7397	0	0	0	0	0	0.0809	0	0	0	0	0	0.9345	0	0	0.0414	0.1853	0.0705	down	-1.3942	0.0280028	*
hsa-miR-1275	0.3528	0	0.523	0.259	0	1.6077	0.192	0	0.3596	0	0.2895	0	0	0	0.678	0	0	0	0	0	0	0	0	0.0913	0.075	0.0835	0.4248	0.0913	0	0	0.2841	0.0511	down	-2.475	0.0286926	*
hsa-miR-133a-3p	10.5843	1.6704	7.3972	2.8495	1.5736	4.1087	7.4864	9.5837	4.046	3.1915	3.4741	0.776	2.2841	1.7554	8.9992	11.3915	5.3974	1.61	15.0008	1.61	22.407	0.5781	12.8201	2.192	14.8403	2.506	42.7311	2.192	15.0008	0.0829	4.652	10.024	up	1.1075	0.0290777	*
hsa-miR-4724-5p	0	0	0.2989	0.6908	0	0.268	0.5759	1.5818	0	0	0	0	0	0	0	0.2946	0	0	0	0	0	0	0	0	0	0	0	0	0	0	0.2277	0.0196	down	-3.5382	0.0292954	*
hsa-miR-6750-3p	0	0	0	0	0	0	0	0	0	0.0887	0	0	0	0	0	0	0	0.1695	0.2601	0.1695	0.0809	0.2477	0	0	0	0	0	0	0.2601	0	0.0059	0.0792	up	3.7467	0.0299011	*
hsa-miR-379-3p	0	0.1452	0	0.8635	0	0.0893	0.096	0.1861	0.2697	0	0	0	0	0.0924	0.3082	0	0	0	0	0	0.0809	0	0	0.0913	0	0	0	0.0913	0	0	0.1367	0.0176	down	-2.9574	0.0300192	*
hsa-miR-6758-3p	0	0	0	0.1727	0	0.0893	0	0	0.3596	0	0	0	0	0	0	0.0982	0.0871	0	0.5203	0	0.0809	0.0826	0	0	0	0	0.8495	0	0.5203	0	0.0414	0.1493	up	1.8505	0.0306368	*
hsa-miR-619-5p	0	0.4357	0.1494	0.0863	0.1816	0.3573	0.8638	0.3722	0.6294	0.266	0	0.1552	1.1789	4.4348	0.1849	0.1964	0.8705	0.2542	0.1734	0.2542	0.2427	0	0.0838	0	0.2249	0	0.5947	0	0.1734	0.0414	0.6197	0.2073	down	-1.5798	0.0309792	*
hsa-miR-3918	0.1764	0.0726	0.1494	0.0863	0.0605	0	0.2879	0	0	0	0	0.2328	0	0	0	0	0	0.0847	0	0.0847	0	0	0	0	0	0	0	0	0	0	0.0711	0.0113	down	-2.6535	0.0310188	*
hsa-miR-6509-5p	0	0	0	0.1727	0	0	0.096	0	0	0.0887	0	0.1552	0.1474	0	0	0	0	0	0	0	0	0.0826	0.419	0.1827	0	0	0	0.1827	0	2.0308	0.044	0.1932	up	2.1345	0.0312725	*
hsa-miR-4508	42.602	3.7764	122.016	4.6628	3.7523	37.1569	11.7095	43.5454	92.7888	13.9186	120.63	7.0618	263.035	18.4784	34.4557	4.5173	1.654	6.0162	8.2375	6.0162	15.0458	4.3767	3.8544	1.644	27.8819	0.7518	178.74	1.644	8.2375	48.9874	54.6393	21.1736	down	-1.3677	0.0315948	*
hsa-miR-519d-3p	0	0	0	0	0	0	0	0	0	0	2.6056	0	0	0	0	0	0	0	0	0	0	0	0	0	0	0	0	0	0	0	0.1737	0	down	-4.1185	0.0317062	*
hsa-miR-4701-3p	0	0.0726	0.0747	0	0	0	0.192	0	0	0	0	0	0	0	0.3082	0	0	0	0	0	0	0	0	0	0	0	0	0	0	0	0.0432	0	down	-2.111	0.0331044	*
hsa-miR-1270	0	0.0726	0	0.0863	0	1.0718	0.192	0.6513	0	0	1.0615	0.6984	0.4421	0	0.1233	0	0	0	0	0	0.0809	0.0826	0.3352	0.0913	0	0	0	0.0913	0	0	0.2933	0.0454	down	-2.6916	0.033122	*
hsa-miR-409-3p	306.946	22.7313	343.858	537.261	9.0782	356.116	34.1687	39.0792	282.502	29.2556	155.951	165.68	214.628	52.7557	1595.75	144.357	163.141	115.495	23.5851	115.495	139.942	76.7989	37.7062	65.0304	53.5152	82.1953	200.828	65.0304	23.5851	70.3313	276.384	91.8024	down	-1.5901	0.0340294	*
hsa-miR-3164	0	0.1452	0	0.1727	0.1816	1.0718	0	0	0.4496	0	0	0.5432	0.5158	0.1848	0.4931	0.3928	0	0	0.0867	0	0.0809	0.0826	0	0.0913	0	0	0.3398	0.0913	0.0867	0	0.2505	0.0835	down	-1.585	0.034867	*
hsa-miR-6852-3p	1.323	0.2179	5.3798	2.6768	0.4237	2.7689	1.1518	0.8374	2.4276	0.1773	0.6755	0.4656	2.5788	0.2772	2.2806	0	0.0871	0.9321	0	0.9321	0.5662	0.8258	0.6703	0.548	0	0.4177	0.3398	0.548	0	0	1.5775	0.3911	down	-2.012	0.0349102	*
hsa-miR-1193	0.0882	0	0.2989	0.0863	0	0.0893	0.096	0	0.2697	0	0	0	0	0	0.5547	0	0	0	0	0	0.1618	0	0	0	0	0	0	0	0	0	0.0989	0.0108	down	-3.1949	0.0349576	*
hsa-miR-15b-3p	0.5292	0.3631	0.7472	2.1587	0.9078	1.5184	0.192	4.2801	4.046	0.6206	1.4476	0.2328	0.8842	1.4783	0.5547	0	0.0871	0.8474	0	0.8474	0.4853	0.8258	0.0838	0.0913	1.7988	0.2506	0.8495	0.0913	0	0.0414	1.3307	0.42	down	-1.6637	0.0352771	*
hsa-miR-221-5p	0.5292	1.0167	3.6612	5.0946	1.0289	2.7689	2.3995	5.4897	6.114	0.266	0.193	0.4656	2.4314	4.9892	1.9108	0.6874	1.3058	2.1184	0.3468	2.1184	1.2943	1.4864	1.0055	0.4567	0.4497	0.0835	1.699	0.4567	0.3468	0.0829	2.5572	0.9292	down	-1.4605	0.0353319	*
hsa-miR-7976	2.2933	0.6536	5.0809	1.2952	0.3026	2.0543	0.5759	2.5122	4.3158	0.7092	0	0.4656	6.9995	0.0924	0.5547	0.2946	0	0.7626	1.1272	0.7626	0.4045	0.0826	0.7541	0.274	0.1499	0	5.6918	0.274	1.1272	0.0414	1.8603	0.7831	down	-1.2483	0.0372113	*
hsa-miR-26a-1-3p	0	0	0	0.1727	0	0.0893	0	0	0.4496	0	0	0.1552	0	0	0	0	0	0	0	0	0	0	0	0	0	0	0	0	0	0	0.0578	0	down	-2.5311	0.0376004	*
hsa-miR-6824-3p	0	0	0	0	0	0	0	0.093	0	0	0	0	0	0	0	0	0	0.0847	0	0.0847	0	0	0.5865	0	0	0	0	0	0	0	0.0062	0.0504	up	3.0231	0.0378519	*
hsa-miR-6827-5p	0.441	0.0726	1.0461	0	0.0605	0.268	0.096	0.093	0	0	0	0.0776	1.2525	0	0.1849	0	0	0.1695	0	0.1695	0	0	0	0	0	0	0.6796	0	0	0	0.2395	0.0679	down	-1.8185	0.0380822	*
hsa-miR-3912-3p	0	0	0	0	0	0	0	0	0.5395	0	0	0	0	0.2772	0	0	0	0.5084	0.6937	0.5084	0	0	0	0.3653	0	0	0	0.3653	0.6937	0	0.0544	0.209	up	1.9418	0.0384525	*
hsa-miR-642a-5p	0	0.0726	0	0	0	0	0	0	0	0.0887	0	0	0	0	0	0.7856	0	0.0847	0.6937	0.0847	0	0	0	0	0	0	0	0	0.6937	0	0.0108	0.1562	up	3.8543	0.0384542	*
hsa-miR-6845-5p	0	0	0	0	0	0	0	0	0	0	0	0	0	0	0	0	0	0.0847	0	0.0847	0	0	0.1676	0	0	0	0.4248	0	0	0	0	0.0508	up	2.3448	0.0388763	*
hsa-miR-31-3p	0	0.0726	0	0	0	0	0.096	2.2331	0	0	0.0965	0	0	0.0924	0	0	0	0	0	0	0	0	0	0	0.075	0	0	0	0	0.0414	0.1727	0.0078	down	-4.4687	0.0396221	*
hsa-miR-93-3p	1.2348	0.4357	3.736	0.9498	0.4237	2.7689	0.2879	3.3496	2.4276	0.0887	0.2895	0.4656	0.4421	0.1848	0.8013	0.491	0	0.4237	0.3468	0.4237	0.3236	0.2477	0	0.1827	1.7988	0.3341	1.1044	0.1827	0.3468	0.0414	1.1924	0.4165	down	-1.5175	0.0408172	*
hsa-miR-4510	0	0	0	0.0863	0	0.0893	0	0	0.0899	0	0	0.4656	0.0737	0	0	0.6874	0.0871	0.0847	0.2601	0.0847	0	0.0826	0.0838	0	0.2249	0.0835	0.5947	0	0.2601	0.1243	0.0537	0.1772	up	1.7224	0.0408321	*
hsa-miR-369-3p	0	0	0	0	0	0.0893	0	0.1861	0.1798	0.0887	0	0	0	0.0924	0	0	0.0871	0.4237	0	0.4237	0	0.3303	0	0	0	0	1.6141	0	0	0.0414	0.0424	0.1947	up	2.1991	0.0413209	*
hsa-miR-6726-5p	0	0	0	0	0	0	0.4799	0	0.0899	0.1773	0	0	0	0	0	0	0	0	0	0	0	0	0	0	0	0	0	0	0	0	0.0498	0	down	-2.3161	0.0413292	*
hsa-miR-431-3p	0.7056	0	2.4657	0.4317	0.0605	1.1612	0.2879	0.6513	0.0899	0	0	0.6208	0.0737	0.1848	1.9724	0.3928	0.1741	0.3389	0	0.3389	0.0809	0.1652	0	0	0	0.2506	0.085	0	0	0	0.5804	0.1218	down	-2.2525	0.0416959	*
hsa-miR-597-3p	0	0.2179	0.0747	0	0	0.268	0.096	0	0	0	0	0	0	0	0	0	0	0	0	0	0	0	0	0	0	0	0	0	0	0	0.0438	0	down	-2.1309	0.0426402	*
hsa-miR-328-5p	0	0	0.0747	0	0	0.1786	0	0	0	0	0	0	0	0	0.678	0	0	0	0	0	0	0	0	0	0	0	0	0	0	0	0.0621	0	down	-2.6346	0.0443778	*
hsa-miR-380-5p	0	0	0	0	0	0.268	0	0	0	0	0	0.0776	0	0.462	0.2466	0	0	0	0	0	0.0809	0	0	0	0	0	0	0	0	0	0.0703	0.0054	down	-3.7025	0.0444768	*
hsa-miR-3163	0	0	0	0	0	0	0	0	0	0	0	0	0	0	0	0	0	0.1695	0	0.1695	0.0809	0.0826	0	0	0	0	0	0	0	0	0	0.0335	up	1.7442	0.0446358	*
hsa-miR-5006-5p	0	0	0.0747	0	0	0.0893	0.2879	0	0	0	0.4825	0	0	0	0	0	0	0	0	0	0	0	0	0	0	0	0	0	0	0	0.0623	0	down	-2.6392	0.0455729	*
hsa-miR-371a-5p	0	0.4357	0	0	0	0	0	0	0.0899	0.0887	0	0	0	0	0	0	0	0	0	0	0	0	0	0	0	0	0	0	0	0	0.041	0	down	-2.0356	0.04571	*
hsa-miR-6793-5p	0.1764	0.0726	0.1494	1.1225	0.2421	0.268	0.8638	1.3026	0.0899	0	1.158	0	0.9578	0	0	0.6874	0.3482	0.0847	0	0.0847	0.0809	0	0	0	0	0	0.085	0	0	0	0.4269	0.0914	down	-2.2236	0.0457609	*
hsa-miR-556-5p	0	0	0	0.259	0.1816	1.6971	0	0	0.0899	0	0	0	0	0	0.1233	0	0	0.0847	0	0.0847	0.0809	0	0	0	0	0	0	0	0	0	0.1567	0.0167	down	-3.2301	0.0457646	*
hsa-miR-148a-5p	12.9658	5.7373	68.368	22.3643	12.77	58.0576	25.0506	44.5689	31.6489	0.3546	38.1191	13.8131	19.1566	3.3261	70.2675	21.7027	2.7858	3.9826	2.081	3.9826	8.2509	4.4593	2.0948	5.1148	2.6982	3.6754	36.2747	5.1148	2.081	51.1425	28.4379	10.3627	down	-1.4564	0.0466705	*
hsa-miR-4731-5p	0	0	0	0	0	0	0	0	0	0	0	0	0	0.0924	0	0	0	0	0	0	0	0	0.419	0	0	0	0	0	0	0.7046	0.0062	0.0749	up	3.5946	0.0479278	*
hsa-miR-16-1-3p	1.0584	0.0726	1.4197	2.5905	0	0.1786	0.2879	9.8628	10.5197	0.1773	0	0.0776	0	0	0.3082	0	0	0	1.0405	0	0.0809	0	0	0	1.3491	0	0.7646	0	1.0405	0.0414	1.7702	0.2878	down	-2.6208	0.0480825	*
hsa-miR-6829-5p	0	0	0.2242	0	0	0.0893	0	0.4652	0	0	0	0	0	0	0.1233	0	0	0	0	0	0	0	0	0	0	0	0	0	0	0	0.0601	0	down	-2.5874	0.0481437	*
hsa-miR-1278	0	0	0	0	0	0.1786	0.096	0	0	0	0	0	0	0	0	0	0.0871	0.0847	0	0.0847	0	0	0.0838	0.274	0	0	0	0.274	0	0	0.0183	0.0592	up	1.6938	0.0482615	*
hsa-miR-6505-5p	0	0	0	0	0.121	0.7146	0	0	0	0	0	0.1552	0	0.0924	0.6164	0	0	0	0	0	0.1618	0	0.0838	0	0	0	0	0	0	0	0.1133	0.0164	down	-2.7884	0.0484263	*
hsa-miR-6859-5p	0.1764	0.2179	0.3736	0	0.0605	2.0543	0.096	1.8609	0.3596	0.0887	0	0.5432	0.8842	0.0924	0.1849	0.3928	0	0.1695	0	0.1695	0.2427	0.4129	0	0	0	0.0835	0.4248	0	0	0	0.4662	0.1264	down	-1.883	0.0489467	*
hsa-miR-2682-5p	0	0	0	0	0	0	0	0	0	0	0	0	0	0	0	0	0	0	0	0	0	0.1652	0.0838	0.0913	0	0	0	0.0913	0	0	0	0.0288	up	1.5261	0.0490138	*
hsa-miR-652-3p	11.29	5.4468	23.3124	8.4622	12.8911	29.654	6.8145	31.0773	24.2762	3.5461	22.5819	11.8731	13.0412	5.8207	4.6845	3.1425	1.3929	12.9645	2.1678	12.9645	25.4	9.8269	1.592	2.0094	2.8481	0.6683	18.7745	2.0094	2.1678	0.8289	14.3181	6.5838	down	-1.1208	0.0491759	*
hsa-miR-1250-5p	0.3528	0.5084	6.3511	0.1727	0.7868	5.1805	1.9196	4.5592	1.8881	0.266	0.965	1.3192	1.4736	0.462	2.7121	0.1964	0	1.1863	0	1.1863	2.7503	0.5781	0.5865	0.4567	0	0.3341	2.2088	0.4567	0	0	1.9278	0.6627	down	-1.5405	0.0495342	*
hsa-miR-627-3p	0	0	0	0	0.1816	0.4466	0	0	0	0	0	0	0	0.0924	0	0	0	0	0	0	0	0	0	0	0	0	0	0	0	0	0.048	0	down	-2.263	0.049992	*
hsa-miR-202-5p	0	0	0	0	0	0	0	0.2791	0	0.3546	0	0	0	0	0	0	0.1741	0	0	0	0	0	0	0	0	0	0.4248	0	0	4.9733	0.0422	0.3715	up	3.138	0.0504192
hsa-miR-212-5p	0	0.2179	0.4483	0.259	0.121	0.4466	0.096	0.1861	1.7982	0.0887	0	0.0776	0	0.2772	0	0.0982	0	0.1695	3.1216	0.1695	0.0809	0.1652	0	0.274	0	0	1.0194	0.274	3.1216	0.1243	0.2678	0.5745	up	1.1012	0.051661
hsa-miR-4647	0.9702	0.0726	3.2876	0.1727	0.6052	2.8582	1.8236	1.2096	1.5285	0.1773	2.1231	1.0088	1.4736	0.1848	1.6642	0.3928	0.1741	0	0	0	0.1618	0	0.8379	0.548	0	0.2506	2.0389	0.548	0	1.3262	1.2773	0.4186	down	-1.6095	0.0520618
hsa-miR-151b	0	0	0.2989	0.0863	0	0.268	0	0	0	0.0887	0.0965	0	0	0	0.2466	0	0	0.4237	0.0867	0.4237	0.3236	0.2477	0.1676	0.0913	0	0	1.0194	0.0913	0.0867	0	0.0723	0.1974	up	1.4491	0.0527397
hsa-miR-6852-5p	8.1147	3.4133	13.0759	5.0082	8.7756	30.2793	6.3346	21.8657	8.7214	1.4185	10.1329	12.1059	10.0941	3.6033	17.197	1.1784	1.0447	10.3377	0.7804	10.3377	13.8325	6.5238	1.5082	2.466	0	1.5036	5.5219	2.466	0.7804	0	10.676	3.8854	down	-1.4582	0.054375
hsa-miR-7155-3p	0.3528	0.0726	0.0747	0	0	0.0893	0	1.3957	0.3596	0	0	0	0.3684	0.0924	0.2466	0.3928	0	0	0	0	0.0809	0.0826	0	0	0	0	0	0	0	0	0.2035	0.0371	down	-2.4555	0.0566003
hsa-miR-6774-3p	0	0	0	0	0	0	0	0	0	0	0	0	0	0	0	0	0	0	0	0	0	0	0.419	0.0913	0	0	0	0.0913	0	0	0	0.0401	up	2.0036	0.0567005
hsa-miR-4318	0	0.0726	0	0	0	0.0893	0	0.093	0.0899	0	0	0.0776	0.4421	0	0.678	0	0	0	0.0867	0	0	0	0	0	0	0	0.085	0	0.0867	0	0.1028	0.0172	down	-2.5794	0.0577154
hsa-miR-4529-3p	0	0	0	0	0	0	0	0	0	0	0	0	0	0	0	0	0	0	0.3468	0	0	0	0	0	0	0	0	0	0.3468	0	0	0.0462	up	2.2079	0.0601082
hsa-miR-30d-3p	0.441	0	0.5978	0.9498	0.4842	3.1262	0.096	1.3026	4.4956	0.1773	0	0	0.8105	0.462	0.9862	1.6694	0	0.0847	0	0.0847	0.8898	0.0826	0.419	0.0913	0	0.0835	2.1238	0.0913	0	0.0414	0.9286	0.3774	down	-1.299	0.0601417
hsa-miR-624-5p	0	0	0	0	0	0	0	0	0	0	0	0	0	0	0	0	0	0	0.3468	0	0	0	0	0	0	0	0	0	0.3468	0	0	0.0462	up	2.2079	0.0601495
hsa-miR-1229-3p	0.1764	0.1452	0	0.1727	0	0.0893	0	0	0	0.1773	0	0	0	0	0	0	0.4353	0.1695	0	0.1695	0.3236	0.3303	0	0.3653	0	0	0.4248	0.3653	0	0	0.0507	0.1722	up	1.764	0.0604939
hsa-miR-6751-5p	0	0	0.2242	0	0	0.0893	0	0	0	0	0	0	0	0	0.4315	0	0	0	0	0	0	0	0	0	0	0	0	0	0	0	0.0497	0	down	-2.3132	0.0612339
hsa-miR-124-3p	0	0	0.2242	0	0	0	0	1.2096	0.2697	0.3546	0.6755	0	0.5158	1.0163	0	0	0	0.0847	0	0.0847	0.1618	0.0826	0	0	0.4497	0	0	0	0	0	0.2844	0.0576	down	-2.3038	0.0624507
hsa-miR-6715a-3p	0	0	0	0	0	0	0	0	0	0	0	0.0776	0	0	0	0	0	0	0	0	0	0	0	0	0	0	0	0	0	1.0361	0.0052	0.0691	up	3.7321	0.0625977
hsa-miR-1288-3p	0.882	0.3631	1.7933	0.6908	0.5447	2.233	1.0558	2.047	1.8881	0.0887	0	0.2328	2.063	0	0.9862	0.5892	0.1741	0.0847	0	0.0847	0.4045	0	0	0.548	0	0.2506	3.1432	0.548	0	0	0.9912	0.3885	down	-1.3513	0.0631711
hsa-miR-642a-3p	0.7056	1.743	0.8966	0.9498	0.6657	0.4466	1.4397	2.7914	1.9781	0.5319	0	0.5432	3.6103	1.1087	0	6.5795	0.3482	1.4405	0.3468	1.4405	1.0516	0.4129	4.9437	0.9133	1.499	0.6683	12.8278	0.9133	0.3468	1.865	1.1607	2.3731	up	1.0318	0.0640136
hsa-miR-642b-3p	0	0	0	0	0	0	0	0	0	0	0	0	0	0	0	0	0	0	0.1734	0	0	0	0.0838	0	0	0	0.1699	0	0.1734	0	0	0.04	up	2	0.0642924
hsa-miR-219a-1-3p	0.5292	0.1452	0.9713	0.6908	0.4237	2.5903	0.6719	1.7679	0.7193	0.1773	0.2895	0.8536	0.8842	0.2772	0.9862	1.2766	0.4353	0.1695	0.7804	0.1695	0.4045	0.1652	0.0838	0	0	0.0835	0.9345	0	0.7804	0	0.7985	0.3522	down	-1.1809	0.0644966
hsa-miR-541-3p	0.0882	0	1.4197	0.6044	0.121	1.1612	0.2879	0	0.5395	0	0.6755	0	0.0737	0	3.8216	0	0	0.0847	0	0.0847	0.1618	0.1652	0	0	0.8245	0	0.5947	0	0	0.4973	0.5862	0.1609	down	-1.8652	0.0646594
hsa-miR-650	0	0	0	0	0	0	0.4799	0.1861	0.0899	0	0	0	0	0	0	0	0	0	0	0	0	0	0	0	0	0	0	0	0	0	0.0504	0	down	-2.3334	0.0651956
hsa-miR-6861-3p	0.1764	0.2905	0.0747	0	0	0.268	0.096	0.5583	0	0	0.6755	0	0.5158	0	0.1233	0	0	0	0	0	0.2427	0.0826	0.2514	0	0	0	0	0	0	0	0.1852	0.0384	down	-2.2699	0.0654209
hsa-miR-21-3p	0	0.4357	1.7185	2.5041	1.3315	10.7183	0.192	3.2566	5.8443	0.5319	4.2462	1.552	5.1575	0.5544	6.0405	2.0622	0.2612	1.0168	0	1.0168	2.8312	1.1561	1.1731	0.4567	3.073	0.1671	3.1432	0.4567	0	0	2.9389	1.1209	down	-1.3906	0.0659804
hsa-miR-4473	0	0.0726	0	0.1727	0	0.1786	0	0	0.4496	0	0	0	0	0	0	0.0982	0	0.1695	0	0.1695	0.1618	0	0	0.4567	0	0	0.6796	0.4567	0	0	0.0582	0.1461	up	1.3279	0.0662516
hsa-miR-1301-3p	11.9956	9.7316	23.3124	23.0551	4.5391	124.154	17.4683	20.9353	24.456	3.3688	57.8059	8.381	42.1445	11.9185	76.0615	7.6598	15.844	16.015	0.6937	16.015	44.4904	15.6075	7.2899	4.2014	5.0217	6.0978	7.8156	4.2014	0.6937	2.238	30.6218	10.259	down	-1.5777	0.0669523
hsa-miR-4483	0	0	0	0	0	0	0	0.093	0.0899	0	0	0	0	0	0	0	0	0	0.0867	0	0	0	0.0838	0.0913	0	0.0835	0	0.0913	0.0867	0	0.0122	0.0349	up	1.5163	0.0670207
hsa-miR-6878-5p	0.3528	0	0	0	0	0.0893	0.096	0	0	0	0	0	0.8842	0	0	0	0	0	0	0	0.0809	0	0	0	0	0	0	0	0	0	0.0948	0.0054	down	-4.1339	0.0671972
hsa-miR-548c-5p	0	0	0	0	0	0.0893	0	0	0.1798	0	0	0.0776	0	0.1848	0	0	0	0	0	0	0	0	0	0	0	0	0	0	0	0	0.0354	0	down	-1.8237	0.0679985
hsa-miR-548aq-3p	0	0	0	0.8635	0.121	1.3398	0	0.5583	2.2478	0.0887	1.3511	0	1.842	1.0163	0	0.491	0	0	0.0867	0	0.2427	0.0826	0.1676	0.1827	0.6746	0	0.1699	0.1827	0.0867	0	0.6286	0.1578	down	-1.994	0.0680158
hsa-miR-195-3p	0	0.581	0.2989	0.9498	0.5447	0.8039	0	0.7444	0.989	0.4433	0	1.3968	2.063	1.6631	0	7.1688	0	0.8474	1.4741	0.8474	0.4853	0.3303	3.6868	0.7307	1.1992	0.7518	5.2671	0.7307	1.4741	0.0829	0.6985	1.6718	up	1.2591	0.0680472
hsa-miR-548o-5p	0	0	0	0	0	0.0893	0	0	0.1798	0	0	0.0776	0	0.1848	0	0	0	0	0	0	0	0	0	0	0	0	0	0	0	0	0.0354	0	down	-1.8237	0.0680589
hsa-miR-548am-5p	0	0	0	0	0	0.0893	0	0	0.1798	0	0	0.0776	0	0.1848	0	0	0	0	0	0	0	0	0	0	0	0	0	0	0	0	0.0354	0	down	-1.8237	0.068065
hsa-miR-1304-5p	0.7056	0	0.523	0.4317	0.3026	2.7689	0.096	0.5583	2.6974	0.1773	0	0	2.063	0	0	0.0982	0	0.2542	0.0867	0.2542	0.3236	0.5781	0	0.0913	0	0	0.7646	0.0913	0.0867	0	0.6883	0.1753	down	-1.9732	0.069962
hsa-miR-7847-3p	0.1764	0	0.3736	0	0	0	0	0	0	0	0	0	0	0.0924	0	0	0	0	0	0	0	0	0	0	0	0	0	0	0	0	0.0428	0	down	-2.0976	0.0700067
hsa-miR-297	0	0	0	0.1727	0	0	0.192	0.093	0.2697	0	0	0	0	0	0	0	0	0	0	0	0	0	0	0	0	0	0	0	0	0	0.0485	0	down	-2.278	0.0717152
hsa-miR-3691-3p	0	0	0	0	0	0	0	0	0	0	0	0	0	0	0	0	0	0	0	0	0	0	0	0	0	0	0	0	0	0.5388	0	0.0359	up	1.844	0.0718497
hsa-miR-3177-3p	4.4983	1.6704	5.9028	4.8355	2.0577	17.5959	3.2633	8.188	5.7543	0.7092	15.8267	5.8977	8.1047	0.6467	7.7048	0.8838	1.3058	2.9657	0.1734	2.9657	11.4057	4.2941	0.7541	0.4567	1.2742	1.0024	9.7695	0.4567	0.1734	1.6163	6.1771	2.6332	down	-1.2301	0.0718708
hsa-miR-196a-3p	0	0	0	0	0	0	0	0	0	0	0	0	0	0	0	0	0	0	0	0	0	0	0	0.1827	0	0	0.1699	0.1827	0	0	0	0.0357	up	1.8359	0.0721159
hsa-miR-6876-5p	0	0	0	0	0	0	0	0	0	0	0	0	0	0	0	0	0	0	0	0	0.0809	0	0	0.1827	0	0	0	0.1827	0	0	0	0.0298	up	1.5753	0.0725015
hsa-miR-1295a	0	0	0	0	0	0	0	0	0	0.0887	0	0	0	0.0924	0	0.491	0	0.2542	0	0.2542	0.1618	0.1652	0	0	0	0	0	0	0	0	0.0121	0.0884	up	2.869	0.0728823
hsa-miR-3653-3p	0.6174	0	0.0747	0	0	0.1786	0	0	0.4496	0.0887	0	0	0	0	0	0	0	0	0	0	0.1618	0	0	0	0	0	0	0	0	0	0.0939	0.0108	down	-3.1201	0.0750527
hsa-miR-324-5p	0.3528	0	0.2242	0.259	0	1.6077	0	3.4427	0.8092	0.0887	0.579	0.1552	1.3999	0.0924	0.6164	0	0	0.3389	0	0.3389	0.2427	0.0826	0.7541	0	0.4497	0	0.3398	0	0	0	0.6418	0.1698	down	-1.9183	0.0759888
hsa-miR-6853-3p	0	0	0	0	0	0.1786	0	0	0	0	0	0.0776	0.8105	0	0	0	0	0	0	0	0	0	0	0	0	0	0	0	0	0	0.0711	0	down	-2.8298	0.0767213
hsa-miR-455-3p	0	0	0	0.6044	0	0	0.192	0.4652	0	0	0	0	0	0.2772	0	1.6694	0	0.0847	0	0.0847	0	0	0.0838	0	0.1499	0.0835	2.2088	0	0	1.2848	0.1026	0.3766	up	1.876	0.0771086
hsa-miR-4674	0	0	0	0	0	0	0.096	0.2791	0	0	0	0	0	0	0	0.491	0	0	0	0	0	0	0	0	0	0	0.9345	0	0	0.6631	0.025	0.1392	up	2.4772	0.0772314
hsa-miR-6777-3p	0	0	0	0	0	0	0	0	0.2697	0	0	0	0	0	0	0	0	0	0.607	0	0.1618	0	0	0	0	0	0	0	0.607	0	0.018	0.0917	up	2.3489	0.0773832
hsa-miR-6726-3p	0.2646	0	0.1494	0	0	0	0	0	0	0.1773	0	0	0	0	0.4315	0	0	0	0	0	0.0809	0.0826	0	0	0	0	0	0	0	0	0.0682	0.0109	down	-2.6454	0.0777375
hsa-miR-708-5p	0.3528	0	0	0	0	0	0	1.2096	0.1798	0.7092	0	0	0.3684	0	0	0	0	0	0.0867	0	0	0	0	0	0.075	0	0.085	0	0.0867	0.2072	0.188	0.036	down	-2.3847	0.0780824
hsa-miR-6865-5p	0	0	0	0.259	0.1816	0.0893	0	0	0	0	0	0	0	0	0	0	0	0	0	0	0	0	0	0	0	0	0	0	0	0	0.0353	0	down	-1.8197	0.0803048
hsa-miR-940	0	0	0	0	0.0605	0.3573	0	0	0.1798	0	0	0	0	0	0.678	0	0	0.0847	0	0.0847	0	0	0	0	0	0	0	0	0	0	0.085	0.0113	down	-2.9111	0.0805689
hsa-miR-4687-3p	0	0	0	0	0	0.1786	0.096	0	0	0	0.2895	0.0776	0.221	0	0.5547	0	0	0.0847	0	0.0847	0.0809	0	0	0	0	0	0	0	0	0	0.0945	0.0167	down	-2.5005	0.08137
hsa-miR-3677-3p	0	0	0.0747	0	0.0605	0.0893	0	0	0	0	0	0	0	0	0.1233	0.491	0	0.0847	0	0.0847	0.0809	0	0	0	0.3748	0	0.7646	0	0	0	0.0232	0.1254	up	2.4343	0.0821911
hsa-miR-1229-5p	0	0	0	0	0.0605	0.0893	0	0	0	0	0	0	0	0	0.3698	0	0	0	0	0	0	0	0	0	0	0	0	0	0	0	0.0346	0	down	-1.7908	0.0823638
hsa-miR-205-5p	0.0882	0.0726	0.0747	0.3454	0.0605	0.268	0	0	1.2588	6.383	7.6238	3.1041	1.3262	0	0.0616	1.7676	0.6094	0.4237	31.5625	0.4237	1.2943	0.0826	0.3352	0.274	0.7495	0.1671	2.2937	0.274	31.5625	0	1.3778	4.788	up	1.7971	0.0829255
hsa-miR-615-5p	0	0.0726	0.3736	0	0	0.0893	0	0	0	0	0	0.3104	0	0	0	0	0	0	0	0	0	0	0	0	0	0	0	0	0	0.0414	0.0564	0.0028	down	-4.3322	0.0837155
hsa-miR-450a-1-3p	0	0	0	0	0	0	0	0.6513	0	0	0	0.2328	0	0	0	0	0	0	0	0	0	0	0	0	0	0	0	0	0	0	0.0589	0	down	-2.5583	0.0852518
hsa-miR-4303	0	0	0	0	0	0	0	0	0	0	0	0	0	0	0	0	0	0	0	0	0	0	0	0	0.7495	0	0	0	0	0	0	0.05	up	2.3219	0.0858691
hsa-miR-6843-3p	0.6174	0.6536	1.4197	1.4679	0.3026	3.0369	1.1518	1.2096	1.2588	0.0887	0	2.0176	2.5788	0.3696	2.7121	0.6874	0.2612	0.0847	0.0867	0.0847	1.3752	0.1652	1.0055	0.6393	0	0.5847	0	0.6393	0.0867	0.7046	1.259	0.427	down	-1.56	0.0867735
hsa-miR-3928-3p	1.8523	1.0167	9.7135	1.1225	1.271	9.2892	3.8392	4.5592	3.7763	0.0887	2.3161	3.4145	3.905	1.1087	11.8345	0.0982	0.1741	1.61	0	1.61	5.9051	2.4774	0.9217	0.548	0	0.5012	2.0389	0.548	0	3.9787	3.9405	1.3608	down	-1.5339	0.0875347
hsa-miR-1258	0	0	0.1494	0.0863	0	0	0	0	0	0	0	0	0	0	0	0.0982	0	0	0	0	0	0	0	0	0	0	0	0	0	0.9118	0.0157	0.0673	up	2.0998	0.0878691
hsa-miR-449b-5p	0	0	0	0	0	0	0	0	0	0	1.4476	0	0	0	0	0	0	0	0	0	0	0	0	0	0	0	0	0	0	0	0.0965	0	down	-3.2705	0.0881714
hsa-miR-548ap-3p	0	0	0	0	0	0	0	0	0	0	0	0	0	0	0	0	0.0871	0.1695	0	0.1695	0	0	0	0	0	0	0	0	0	0	0	0.0284	up	1.5059	0.08928
hsa-miR-3176	0.0882	0.3631	0.4483	0.1727	0.2421	0.5359	0.2879	0.7444	0.989	0	0	0.2328	3.0208	0	0.4315	0.2946	0	0	0.0867	0	0	0.1652	0.1676	0.0913	0.4497	0	2.1238	0.0913	0.0867	0	0.5038	0.2371	down	-1.0874	0.0893925
hsa-miR-6818-5p	0	0	0	0.1727	0	0.1786	0	0	0	0	0	0	0	0	0.2466	0	0	0	0	0	0	0	0	0	0	0	0	0	0	0	0.0399	0	down	-1.9964	0.0909446
hsa-miR-454-3p	0	0	0	0.1727	0	0.1786	0	0	0.1798	0.266	0	0.388	0	0.7391	0	0.491	0	1.1863	0.2601	1.1863	0.3236	0.4955	0.2514	0	0.2998	0.3341	0.085	0	0.2601	0.0414	0.1283	0.3476	up	1.4379	0.0915551
hsa-miR-6510-3p	0	0	0	0	0	0	0	0	0	0	0	0	0	0	0	0	0	0	0.2601	0	0	0	0	0	0	0	0	0	0.2601	0	0	0.0347	up	1.7949	0.0917846
hsa-miR-4417	0	0	0	0	0	0	0	0	0	0	0	0	0	0	0	0	0	0	0.2601	0	0	0	0	0	0	0	0	0	0.2601	0	0	0.0347	up	1.7949	0.0918029
hsa-miR-141-5p	0	0	0	0	0	0	0	0	0	0	0	0	0	0	0	0	0	0	0.2601	0	0	0	0	0	0	0	0	0	0.2601	0	0	0.0347	up	1.7949	0.0918541
hsa-miR-4634	0	0	0	0	0	0	0	0	0	0	0	0	0	0	0	0	0	0	0.0867	0	0	0	0	0	0.075	0.0835	0	0	0.0867	0	0	0.0221	up	1.144	0.0947689
hsa-miR-4711-3p	0	0	0	0	0	0	0	0	0	0	0	0	0	0	0	0	0	0	0	0	0.0809	0	0	0	0.5247	0	0	0	0	0	0	0.0404	up	2.0144	0.09482
hsa-miR-6819-5p	0	0	0.6725	0	0.1816	0.3573	0.3839	0.1861	0.2697	0	0.6755	0.1552	0	0	0.2466	0	0.0871	0	0	0	0	0	0.3352	0	0	0	0.8495	0	0	0	0.2086	0.0848	down	-1.2986	0.0952929
hsa-miR-1234-3p	0	0	0	0	0	0	0	0.093	0	0	0	0	0	0	0	0	0	0.0847	0	0.0847	0	0.0826	0	0	0	0.0835	0	0	0	0	0.0062	0.0224	up	1.8532	0.0956146
hsa-miR-548ab	0	0	0	0	0.0605	0	0	0	0	0	0	0	0	0	0	0	0	0.0847	0.2601	0.0847	0	0	0	0	0	0	0	0	0.2601	0	0.004	0.046	up	3.5236	0.0957447
hsa-miR-548q	0.3528	0	0	0	0	0.0893	0	0	0	0	0	0	0.5894	0	0	0	0	0.2542	0	0.2542	0.1618	0	0	0	0	0	0.5097	0	0	1.0776	0.0688	0.1505	up	1.1293	0.0966274
hsa-miR-6847-5p	0	0	0	0	0.2421	1.1612	0	0.7444	0	0	1.158	0.5432	0	0	0.1233	0.0982	0	0	0	0	0	0.3303	0	0	0	0.0835	0.1699	0	0	0	0.2648	0.0455	down	-2.541	0.0994946
hsa-miR-548ar-3p	0	0.0726	0	0.7771	0.121	0	0	0	0	0	0	0	0	0.3696	0	0	0	0	0	0	0.0809	0.0826	0	0	0	0	0	0	0	0	0.0894	0.0109	down	-3.0359	0.0997855
hsa-miR-24-1-5p	0.0882	0	0	0.6908	0.0605	0.1786	0.2879	0.7444	0.8092	0	0	0	0	0	0	0.0982	0.0871	0	0	0	0	0.0826	0	0	0	0	0.5097	0	0	0	0.1906	0.0518	down	-1.8795	0.100708
hsa-miR-1254	0.882	0.0726	1.7185	0.3454	0.1816	0.8932	0.096	0.8374	0	0.0887	3.1846	0.5432	0.5894	0.2772	0.6164	0	0	0.2542	0	0.2542	1.1325	0.8258	0	0	0.075	0.1671	0.085	0	0	0	0.6884	0.1863	down	-1.8856	0.101381
hsa-miR-6505-3p	0	0	0	0.259	0	0	0	0	0	0	0	0	0.0737	0	0.2466	0	0	0	0	0	0	0	0	0	0	0	0	0	0	0	0.0386	0	down	-1.9486	0.101608
hsa-miR-6751-3p	0	0	0	0	0.0605	0	0.192	0	0	0.0887	0	0	0	0	0	0	0	0	0	0	0	0	0	0	0	0	0	0	0	0	0.0227	0	down	-1.1827	0.101675
hsa-miR-708-3p	0.0882	0.0726	0.523	0.0863	0	0.268	0.096	0.2791	0.8092	0	0	0.0776	1.5473	1.2011	0.0616	1.1784	0.1741	0.1695	1.8209	0.1695	0.2427	0.2477	0	0	0.2249	0.0835	4.3326	0	1.8209	0.0829	0.3407	0.7032	up	1.0454	0.102172
hsa-miR-4767	0	0	0	0	0	0	0	0	0	0	1.2546	0	0	0	0	0	0	0	0	0	0	0	0	0	0	0	0	0	0	0	0.0836	0	down	-3.0635	0.103146
hsa-miR-15a-5p	0	0	0.1494	1.1225	0.3026	0.3573	0	0.1861	0.8092	0.6206	0	0	0.7368	0.6467	0.0616	0.8838	0	3.0505	0	3.0505	0.8898	0.7432	1.0055	0.1827	0	0	2.3787	0.1827	0	0.0414	0.3329	0.8273	up	1.3133	0.103211
hsa-miR-6832-5p	0	0	0	0	0	0	0	0	0	0	0	0	0	0	0	0	0	0	0	0	0	0	0.7541	0	0	0	0	0	0	0	0	0.0503	up	2.3306	0.103809
hsa-miR-4707-5p	0	0	0	0	0	0	0	0	0	0	0	0	0	0	0	0	0	0	0	0	0	0	0.7541	0	0	0	0	0	0	0	0	0.0503	up	2.3306	0.103905
hsa-miR-676-3p	0	0	0	0.0863	0	0	0	0	0	0	0	0.0776	0	0	0	0	0	0	0	0	0.1618	0	0	0.0913	0	0	0.4248	0.0913	0	0.1243	0.0109	0.0596	up	2.451	0.104004
hsa-miR-4781-3p	0	0	0	0	0.0605	0.0893	0.2879	0	0	0	0	0	0	0	0	0	0	0	0	0	0	0	0	0	0	0	0	0	0	0	0.0292	0	down	-1.546	0.104125
hsa-miR-25-5p	5.645	2.324	5.5292	2.5905	1.4525	8.7533	2.3995	14.9804	4.8552	2.1277	7.1413	1.94	18.5672	0.8315	7.5815	4.6155	1.1317	2.2031	0.6937	2.2031	4.7726	2.3122	2.0948	1.8267	2.6233	1.0024	10.704	1.8267	0.6937	4.476	5.7813	2.8786	down	-1.006	0.105601
hsa-miR-5194	0	0	0	0	0	0	0.2879	0	0	0	0.4825	0	0	0	0	0	0	0	0	0	0	0	0	0	0	0	0	0	0	0	0.0514	0	down	-2.3618	0.106944
hsa-miR-219b-5p	0	0	0	0	0.0605	0.0893	0	0	0.6294	0	0	0	0	0	0	0	0	0	0	0	0	0	0	0	0	0	0	0	0	0	0.0519	0	down	-2.3757	0.107736
hsa-miR-5589-5p	0	0	0	0	0	0.0893	0	0	0	0	0	0	0.0737	0.0924	0	0	0	0	0	0	0	0	0	0	0	0	0	0	0	0.9118	0.017	0.0608	up	1.8385	0.107784
hsa-miR-3200-5p	0	0	0	0	0	0	0	0.093	0	0	0	0	0	0	0	0	0	0	0	0	0	0	0	0	0	0	1.3592	0	0	0	0.0062	0.0906	up	3.8692	0.108854
hsa-miR-500a-5p	0	0	0	0	0	0	0	0	0	0	0	0	0	0	0	0	0	0	0	0	0	0.1652	0	0	0	0.1671	0	0	0	0	0	0.0222	up	1.1506	0.109503
hsa-miR-516a-5p	0	0	0	0	0	0.0893	0	0	0	0	2.0266	0	0.0737	0.0924	0.3082	0.2946	0	0	0	0	0	0	0	0	0	0	0.3398	0	0	0	0.1727	0.0423	down	-2.0295	0.110333
hsa-miR-5001-5p	0	0	0.3736	0.0863	0.0605	0.0893	0.096	0.4652	0	0	0.579	0.1552	0	0	0.1849	0	0.0871	0.0847	0	0.0847	0.0809	0	0	0	0	0.0835	0	0	0	0	0.1393	0.0281	down	-2.3096	0.110458
hsa-miR-6754-3p	0	0	0	0	0	0	0	0	0	0.4433	0	0	0	0	0	0	0	0	0	0	0	0	0	0	0	0	0	0	0	0	0.0296	0	down	-1.5656	0.110602
hsa-miR-548ag	0.0882	0.0726	0	0	0.121	0.3573	0	0.1861	0.2697	0	0	0.388	0.221	0	0.2466	0	0.0871	0.0847	0	0.0847	0.1618	0.0826	0	0	0	0	0	0	0	0.0414	0.13	0.0362	down	-1.8445	0.110711
hsa-miR-3191-3p	0.5292	0.2905	0.7472	0.6044	0.3026	1.965	0.192	1.3957	0.7193	0	0.386	0.6208	0.9578	0	1.9724	0	0.1741	0.9321	0.2601	0.9321	0.2427	0.3303	0	0.0913	0	0.0835	0	0.0913	0.2601	0	0.7122	0.2265	down	-1.6528	0.111221
hsa-miR-551b-5p	0.2646	0	0	0.0863	0	0.0893	0	0	0	0.0887	0	0	0.8105	0	0	0	0	0	0	0	0.0809	0.0826	0	0	0	0	0	0	0	0	0.0893	0.0109	down	-3.0343	0.112372
hsa-miR-6842-5p	0.9702	0.3631	0.7472	0.7771	0.4237	2.6796	1.7276	4.094	3.1469	0	0	0.8536	1.3999	0.1848	1.4177	0	0.0871	0.6779	0	0.6779	0.8898	0.4955	1.2569	0.548	0	0.1671	1.6141	0.548	0	0	1.2524	0.4642	down	-1.4319	0.112783
hsa-miR-377-3p	0.0882	0	0.3736	0.3454	0	0.8932	0	0	0.1798	0	2.0266	0	1.0315	0.2772	2.2806	0	0	0.3389	0	0.3389	0.4853	0.1652	0	0	0	0.1671	0	0	0	0.0414	0.4997	0.1025	down	-2.2854	0.113283
hsa-miR-181c-5p	0	0	0.2242	0.6908	0.0605	1.0718	0.192	0.5583	0.7193	0	2.0266	0	0	0	0.4931	0	0	0.0847	0	0.0847	0.4045	0.0826	0	0	0	0.0835	1.5291	0	0	0	0.4024	0.1513	down	-1.4112	0.116495
hsa-miR-4535	0	0	0	0	0	0	0	0	0.3596	0.8865	0	0	0.0737	0.0924	0.1233	0.3928	0.0871	0	1.4741	0	0.0809	0	0.3352	0	1.2742	0	0.9345	0	1.4741	0.8703	0.1024	0.4615	up	2.1721	0.118253
hsa-miR-1909-5p	0.3528	0	0.1494	0	0	0.268	0	0	0	0	0	0.0776	0	0	0	0	0	0	0	0	0.0809	0	0	0	0	0	0	0	0	0	0.0565	0.0054	down	-3.3872	0.118338
hsa-miR-133b	0.0882	0	0	0.3454	0	0.0893	0	0.1861	0.0899	0.0887	0	0.0776	0	0	0.1849	0	0	0	0.1734	0	0.6471	0	0	0.0913	0.1499	0.1671	1.699	0.0913	0.1734	0	0.0767	0.2128	up	1.4722	0.119747
hsa-miR-4800-5p	0.0882	0	0.1494	0	0	0.4466	0.6719	1.1165	0	0	0.386	0.1552	1.842	0.0924	0	0.2946	0	0	0	0	0	0	0.419	0	0	0	0.1699	0	0	0.2901	0.3299	0.0782	down	-2.0768	0.120891
hsa-miR-4419b	0	0	0	0	0	0	0	0	1.2588	0	0	0	0	0	0	0	0	0	0	0	0	0	0	0	0	0	0	0	0	0	0.0839	0	down	-3.0687	0.121344
hsa-miR-6762-5p	0	0	0	0	0	0	0	0	0	0	1.158	0	0	0	0	0	0	0	0	0	0	0	0	0	0	0	0	0	0	0	0.0772	0	down	-2.9486	0.12227
hsa-miR-485-3p	0	0.0726	0	2.1587	0	0	0	0.093	0.2697	1.4185	0.386	0.2328	0	0.3696	0.1849	0	4.0045	2.4573	0.1734	2.4573	0.5662	1.2387	0	0.4567	0	0	0	0.4567	0.1734	0	0.3457	0.7989	up	1.2085	0.122452
hsa-miR-4455	0	0	0	0	0	0	0	0	0	0	0	0	0	0	0	0	0	0	0	0	0	0	0.0838	0	0.4497	0	0	0	0	0	0	0.0356	up	1.8319	0.122588
hsa-miR-579-5p	0	0	0.5978	0	0	1.1612	0.096	0.5583	0.8991	0	2.7021	0	1.2525	0.2772	0.3082	0.2946	0	0	0	0	0.4045	0.0826	0	0.274	0	0	0.5947	0.274	0	0	0.5235	0.1283	down	-2.0287	0.122725
hsa-miR-1914-3p	0	0	0	0	0	0	0	0	0	0	0	0	0	0	0.6164	0	0	0	0	0	0	0	0	0	0	0	0	0	0	0	0.0411	0	down	-2.0391	0.123973
hsa-miR-6812-3p	0	0	0	0	0	0	0	0	0	0.1773	0	0	0	0	0	0	0	0.0847	0.3468	0.0847	0.0809	0	0	0	0	0.1671	0	0	0.3468	0	0.0118	0.0741	up	2.6507	0.124225
hsa-miR-6736-5p	0.3528	0.0726	1.1955	0	0	0.7146	0.2879	0.8374	0.5395	0.0887	0	0.0776	1.1789	0	0.9246	0	0	0.0847	0	0.0847	0.1618	0.0826	0	0	0	0	0	0	0	0.8703	0.418	0.0856	down	-2.2878	0.124711
hsa-miR-3685	0.1764	0	0	0	0	0	0	0	0.2697	0	0	0	0	0.0924	0	0	0	0	0	0	0	0	0	0	0	0	0	0	0	0	0.0359	0	down	-1.844	0.126164
hsa-miR-548an	0	0	0	0	0.0605	0	0	0.1861	0.3596	0	0	0	0	0	0	0	0	0	0	0	0	0	0	0	0	0	0	0	0	0	0.0404	0	down	-2.0144	0.127596
hsa-miR-6800-5p	0	0	0	0	0	0	0	0	0	0	0	0	0	0	0	0	0.0871	0	0	0	0	0	0.419	0	0	0	0	0	0	0	0	0.0337	up	1.7527	0.129284
hsa-miR-5189-5p	0.882	0.1452	0.8966	0.7771	0.2421	2.1437	1.3437	0.9305	0.4496	0	0.579	0.4656	0.8842	0.0924	1.0478	0	0.0871	0.1695	0	0.1695	0.1618	0.2477	0.1676	0.6393	0.3748	0.2506	1.4442	0.6393	0	0	0.7253	0.2901	down	-1.322	0.129567
hsa-miR-6758-5p	0	0	0	0	0	0.268	0.096	0	0.1798	0	0	0	0	0	0.6164	0	0.0871	0	0	0	0	0	0	0	0	0	0	0	0	0	0.0773	0.0058	down	-3.7363	0.129881
hsa-miR-1343-5p	0	0	0	0	0	0	0	0	0	0	0	0	0	0	0	0.0982	0.2612	0	0	0	0	0	0	0	0	0	0	0	0	0	0	0.024	up	1.263	0.130303
hsa-miR-6837-3p	0.7056	0.0726	0.2242	0.4317	0.0605	1.3398	0.8638	0.6513	1.5285	0	0	0.5432	0.4421	0	1.1711	0	0.5223	0.4237	0	0.4237	0.3236	0.0826	0.2514	0.0913	0	0.0835	0	0.0913	0	0	0.5356	0.1529	down	-1.8086	0.130675
hsa-miR-6754-5p	0.1764	0.0726	0	0	0	0.3573	0.3839	0.1861	0	0	0	0	0	0	0.3082	0	0.1741	0	0	0	0	0	0	0	0	0	0	0	0	0	0.099	0.0116	down	-3.0933	0.13161
hsa-miR-1247-5p	0	0.0726	0	0	0	0	0	0	0	0	0	0	0.1474	0	0	0.0982	0	0	0	0	0.0809	0	0.419	0	0	0.1671	0	0	0	0	0.0147	0.051	up	1.7947	0.132183
hsa-miR-6786-3p	0.2646	0	0	0.0863	0	0	0	0	0	0.1773	0	0	0	0	0	0	0	0.0847	0	0.0847	0.1618	0	0.9217	0.3653	0	0	0	0.3653	0	0	0.0352	0.1322	up	1.9091	0.132393
hsa-miR-4286	0.882	0.3631	0	0	0.1816	1.4291	0	1.954	0.2697	0	0.4825	0.1552	0.5158	0	0.1849	0	0	0.3389	0.0867	0.3389	0.0809	0.1652	0	0.0913	0.075	0	1.2743	0.0913	0.0867	0.0414	0.4279	0.178	down	-1.2654	0.13344
hsa-miR-3166	0	0	0	0	0	0.1786	0	0	0	0	0	0	0.8842	0	0	0	0	0	0	0	0	0	0	0	0	0	0	0	0	0	0.0709	0	down	-2.8258	0.133692
hsa-miR-4676-5p	0.2646	0.0726	0.1494	0.0863	0	0.1786	0	0	0	0	0.6755	0	0.2947	0	0	0	0	0	0	0	0.0809	0	0	0	0	0	0.5097	0	0	0	0.1148	0.0394	down	-1.5429	0.133884
hsa-miR-548ap-5p	0	0	0	0	0.121	0.1786	0.096	0	0	0	0	0	0	0	0	0	0	0	0	0	0	0	0	0	0	0	0	0	0	0	0.0264	0	down	-1.4005	0.134574
hsa-miR-203b-3p	0	0	0	0	0	0	0	0	0	0	0	0	0	0	0	0	0	0	0	0	0	0	0	0.1827	0	0	0	0.1827	0	0	0	0.0244	up	1.2869	0.134581
hsa-miR-135b-3p	0	0	0	0	0	0	0	0	0	0	0	0	0	0	0	0	0	0	0	0	0	0	0	0.1827	0	0	0	0.1827	0	0	0	0.0244	up	1.2869	0.134639
hsa-miR-548j-5p	0.882	0.1452	0.7472	2.2451	0.9078	7.2349	1.2477	1.2096	2.4276	0.4433	0.6755	1.0088	2.7998	1.3859	0.9246	0.5892	0.0871	1.4405	0	1.4405	1.5369	1.0735	0.419	0.3653	0	0.5012	3.1432	0.3653	0	0	1.619	0.7308	down	-1.1476	0.138194
hsa-miR-3127-3p	0.0882	0.1452	0.7472	0.8635	0.0605	0.4466	0.4799	0.5583	0.3596	0	0	0.0776	0	0	0.6164	0.0982	0.1741	0.1695	0	0.1695	0.3236	0	0	0.1827	0	0	0.3398	0.1827	0	0	0.2962	0.1093	down	-1.4383	0.138311
hsa-miR-4507	0	0	0	0	0	0	0	0	0	0	0.579	0	0	0.0924	0	0	0	0	0	0	0	0	0	0	0	0	0	0	0	0	0.0448	0	down	-2.1635	0.139119
hsa-miR-6793-3p	0	0	0	0.0863	0	0.0893	0	0	0	0	0	0	0	0	0	0	0	0.0847	0	0.0847	0.3236	0.0826	0	0	0	0	0	0	0	0	0.0117	0.0384	up	1.7146	0.140548
hsa-miR-7110-3p	0	0.1452	0	0.1727	0	0	0	0	0	0.5319	0	0	0	0	0.1849	0.0982	0.4353	0.3389	0	0.3389	0.2427	0.4129	0	0.274	0	0.3341	0.4248	0.274	0	0	0.069	0.2116	up	1.6167	0.142273
hsa-miR-135a-5p	0	0	0	0	0	0	0	0.1861	0	0	0	0	1.1789	0.5544	0	0	0	0	0	0	0.0809	0	0	0	0	0.0835	0	0	0	0	0.128	0.011	down	-3.5406	0.145505
hsa-miR-3190-3p	0.441	0.581	1.5691	0	0.5447	2.5903	1.9196	2.5122	1.7982	0	0.8685	1.3192	0.221	0.2772	2.219	0.1964	0.1741	0.4237	0	0.4237	1.3752	0.4129	0.5027	0.0913	0	0.5847	2.0389	0.0913	0	1.119	1.1241	0.4956	down	-1.1815	0.146661
hsa-miR-6816-3p	0.0882	0	0	0	0	0.0893	0	0.1861	0	0	0	0.0776	0	0	0	0	0	0	0	0	0	0	0	0	0	0	0	0	0	0	0.0294	0	down	-1.5558	0.147696
hsa-miR-6737-3p	0	0.2905	0	0.0863	0	0	0	0	0	0	0	0	0	0	0	0	0	0	0	0	0	0	0	0	0	0	0	0	0	0	0.0251	0	down	-1.3277	0.148716
hsa-miR-3187-5p	0	0.0726	1.1955	0.0863	0.0605	0.5359	0.3839	0.4652	0.4496	0	0	0.0776	0	0	0.4931	0	0	0.1695	0	0.1695	0.4045	0.0826	0.419	0	0	0	0	0	0	0	0.2547	0.083	down	-1.6176	0.149611
hsa-miR-140-5p	3.5281	2.7597	10.6101	19.4284	2.3603	6.7883	4.799	29.1233	44.776	1.5071	5.1147	0.8536	5.5996	9.6087	1.7259	4.2227	2.4375	7.6262	4.5956	7.6262	6.6331	5.4502	7.2899	1.0047	2.9231	0.6683	7.3059	1.0047	4.5956	1.1604	9.9055	4.3029	down	-1.2029	0.150124
hsa-miR-522-3p	0	0	0	0	0	0	0	0	0	0	2.2196	0	0	0	0	0	0	0.0847	0	0.0847	0	0	0	0	0	0	0	0	0	0	0.148	0.0113	down	-3.7112	0.151654
hsa-miR-1255b-5p	2.3815	0.2179	5.0062	2.3314	1.6341	4.9126	0.8638	5.0245	6.7434	0	0	0.6208	16.5042	0.2772	0.5547	0.5892	0.1741	0.3389	0.7804	0.3389	0.2427	0.7432	3.1003	0.9133	3.148	0.1671	7.136	0.9133	0.7804	0	3.1382	1.2911	down	-1.2813	0.152236
hsa-miR-330-3p	23.3737	26.653	21.6686	37.7343	29.1108	155.952	45.8782	102.071	42.2585	7.2696	67.9388	28.7903	53.1227	14.5979	53.995	12.7663	16.3663	38.9784	5.2893	38.9784	84.0464	32.5363	10.1388	13.7002	10.5681	12.5298	38.3985	13.7002	5.2893	4.0616	47.3609	22.4899	down	-1.0744	0.152487
hsa-miR-3607-3p	0	0	0.0747	0	0	0	0	0	0	0.266	0	0	0	0	0	0	0	0	0	0	0	0	0	0	0	0	0	0	0	0	0.0227	0	down	-1.1827	0.153518
hsa-miR-580-3p	0	0	0	0	0	0	0	0	0	0	0	0	0	0	0	0	0	0	0	0	0	0.1652	0	0	0	0	0.3398	0	0	0	0	0.0337	up	1.7527	0.153894
hsa-miR-4521	0	0	0.8966	0	0.0605	0	0	0.093	0.0899	0	0	0	0	0	0	1.1784	0	0	0.0867	0	0	0	0.1676	0	0.1499	0.2506	1.5291	0	0.0867	0	0.076	0.2299	up	1.5969	0.156334
hsa-miR-548d-5p	0.1764	0.0726	0	0.259	0.121	1.1612	0	1.0235	1.3487	0	0.579	0.1552	0.7368	0.5544	0.3698	0	0	0.2542	0	0.2542	0.5662	0.3303	0	0.0913	0	0.1671	0.085	0.0913	0	0	0.4372	0.1226	down	-1.8343	0.15778
hsa-miR-5192	0	0	0.2989	0	0	0.5359	0	0.1861	0	0	0.0965	0.0776	0	0	0.4315	0	0	0	0	0	0	0	0	0.0913	0	0	0	0.0913	0	0	0.1084	0.0122	down	-3.1514	0.157896
hsa-miR-4726-5p	0.2646	0.0726	0.523	0	0	0.9825	0.096	1.954	0.0899	0	0.4825	0	0	0	0.5547	0	0	0	0	0	0	0.0826	0	0	0	0	0	0	0	0.6217	0.3347	0.047	down	-2.8321	0.158655
hsa-miR-5196-3p	0	0	0	0.0863	0	0	0	0	0	1.2411	0	0	0	0	0	0	0	0	0	0	0	0.2477	0	0	0	0	0	0	0	0	0.0885	0.0165	down	-2.4232	0.158736
hsa-miR-3133	0	0	0	0	0	0	0	0	0	0	0	0	0	0	0	0	0	0	0	0	0	0	0	0	0	0	0	0	0	0.3316	0	0.0221	up	1.144	0.159443
hsa-miR-2116-3p	0	0	0	0	0	0	0	0.093	0	0	0	0	0	0	0	0.1964	0	0.0847	0	0.0847	0	0	0	0	0	0	0	0	0	0	0.0062	0.0244	up	1.9765	0.160722
hsa-miR-373-3p	0	0	0	0.3454	0	0	0	0	0	0	1.2546	0	0	0	0	0	0	0	0	0	0.0809	0	0	0	0.075	0	0	0	0	0	0.1067	0.0104	down	-3.3589	0.164214
hsa-miR-3591-5p	0	0.0726	0	0	0.0605	0.0893	0	0	0	0	0	0	1.1052	0.0924	0.2466	5.5975	0	0	0	0	0	0	0	0	0	0	0.085	0	0	0.1658	0.1111	0.3899	up	1.8112	0.164877
hsa-miR-31-5p	1.5877	2.0335	0.1494	1.5543	0.0605	0	4.895	25.1223	9.8004	0.266	0.579	0.0776	0	0.1848	0	0.1964	0	0.2542	1.3874	0.2542	0	0	0.1676	1.918	0.8994	0.6683	0	1.918	1.3874	0.2487	3.0874	0.62	down	-2.3161	0.166935
hsa-miR-3120-5p	0.6174	0.581	1.1208	1.0362	0.3026	3.8407	0.8638	1.3957	1.9781	0	1.4476	0.5432	1.9157	0.0924	1.9724	0	0.2612	0.4237	0	0.4237	1.5369	0.4129	1.3407	0.3653	0	0.5012	1.2743	0.3653	0	0	1.1805	0.4603	down	-1.3588	0.169391
hsa-miR-6125	0	0	0	0	0	0	0	0	0	0	0	0.0776	0	0	0	0	0	0	0	0	0	0	0	0	0	0	0	0	0	0.5802	0.0052	0.0387	up	2.8958	0.171501
hsa-miR-190a-5p	0	0	0	0	0	0	0	0	0.1798	0	0	0	0.0737	0.2772	0	0	0	0.1695	0	0.1695	0	0.3303	0	0	0.8994	0	0.085	0	0	0	0.0354	0.1102	up	1.6383	0.171872
hsa-miR-542-3p	0.3528	0.0726	0.7472	0.8635	0	0.9825	0.6719	2.4192	1.7982	0.266	0.193	0.5432	1.3262	1.3859	0	0	0	0.2542	0	0.2542	0.4045	0.1652	0.2514	0.0913	0	0.3341	1.1044	0.0913	0	1.2019	0.7748	0.2768	down	-1.485	0.173766
hsa-miR-374a-3p	0	0	0	0.6908	0	0.268	0	0.093	0.4496	0.6206	0	0.0776	0	3.9728	0	0.5892	0	0.1695	0	0.1695	0	0	0.419	0.0913	0.075	0.4177	0.7646	0.0913	0	0.0829	0.4115	0.1913	down	-1.1051	0.176379
hsa-miR-548w	0.2646	0	0	0	0	0.0893	0	0.8374	0.1798	0	0	0	0	0	0	0	0	0	0	0	0.1618	0	0	0	0	0	0	0	0	0	0.0914	0.0108	down	-3.0812	0.179004
hsa-miR-4747-5p	0	0	0	0	0.121	0	0	0.3722	0	0	0	0	0	0	0	0	0	0	0	0	0	0	0	0	0	0	0	0	0	0	0.0329	0	down	-1.7181	0.179527
hsa-miR-1298-5p	0.6174	0.1452	0.2989	0.5181	0	0.8039	0.4799	0	0	0	3.3776	0.1552	1.6946	1.1087	0	0.8838	0	0	0	0	0.0809	0.0826	0.5027	0.274	0	0.0835	2.0389	0.274	0	0	0.6133	0.2814	down	-1.124	0.180808
hsa-miR-3175	0.882	0.4357	4.4084	0.1727	0	2.7689	0.2879	1.5818	0.2697	0	0	0.2328	0.7368	0	1.1095	0.8838	0	0	0.607	0	0.3236	0	0.3352	0.4567	0	0.1671	0	0.4567	0.607	0.0414	0.8591	0.2586	down	-1.7321	0.1818
hsa-miR-490-5p	0	0	0	0	0	0	0	0	0	0	0	0	0	0	0.4931	0	0	0	0	0	0	0	0	0	0	0	0	0	0	0	0.0329	0	down	-1.7181	0.184058
hsa-miR-1273h-5p	2.8225	1.4525	9.3399	2.3314	2.6024	15.5416	5.9507	15.8178	3.5965	1.0638	10.5189	7.9154	3.684	1.9402	13.7453	0.982	0.5223	5.2536	0	5.2536	12.3764	3.7161	2.2624	1.096	0	1.0859	1.1893	1.096	0	5.5121	6.5549	2.6897	down	-1.2851	0.185714
hsa-miR-4762-5p	0	0	0	0	0	0	0	0	0	0	0	0	0	0	0.4315	0	0	0	0	0	0	0	0	0	0	0	0	0	0	0	0.0288	0	down	-1.5261	0.186358
hsa-miR-4793-3p	0.441	0	0	0	0	0.0893	0	0	0	0	0	0	0	0	0	0	0	0	0	0	0	0	0	0	0	0	0	0	0	0	0.0354	0	down	-1.8237	0.186452
hsa-miR-4649-3p	0	0	0	0	0	0	0	0	0	0	0	0	0	0	0.4315	0	0	0	0	0	0	0	0	0	0	0	0	0	0	0	0.0288	0	down	-1.5261	0.18647
hsa-miR-765	0	0	0.523	0	0.121	0.1786	0.096	0	0	0	0.2895	0	0	0	0	0	0	0	0	0	0	0	0.2514	0	0	0	0	0	0	0	0.0805	0.0168	down	-2.2605	0.186683
hsa-miR-4723-3p	0	0	0	0	0	0	0	0	0	0.4433	0	0	0	0	0.1849	0	0.0871	0	0	0	0	0	0	0	0	0	0.085	0	0	0	0.0419	0.0115	down	-1.8653	0.187051
hsa-miR-3122	0	0	0	0	0	0	0.096	0.1861	0	0	0	0	0	0	0	0	0	0	0	0	0	0	0	0.1827	0	0	0.6796	0.1827	0	0	0.0188	0.0697	up	1.8904	0.187509
hsa-miR-372-3p	2.2933	0.1452	0	0	0	0.4466	1.1518	2.4192	1.0789	0.8865	11.7735	0.3104	0.7368	0	0	1.1784	0	0	1.0405	0	0.4045	0	0.6703	0	2.2485	0.0835	0.4248	0	1.0405	0	1.4161	0.4727	down	-1.5829	0.187992
hsa-miR-7111-3p	0	0.0726	0	0	0	0	0	0	0	0	0	0.0776	0	0	0	0	0	0.2542	0	0.2542	0	0.0826	0	0.0913	0	0	0	0.0913	0	0	0.01	0.0516	up	2.3674	0.190119
hsa-miR-19b-3p	0.6174	1.8156	4.8567	10.4482	2.3603	23.6696	6.0467	10.7933	17.7126	9.22	22.2924	1.7072	21.6617	11.1794	6.8418	2.4551	1.3929	10.8462	2.9481	10.8462	9.3834	10.8179	3.5192	0.7307	2.0237	2.3389	8.0705	0.7307	2.9481	0.5388	10.0815	4.6394	down	-1.1197	0.19465
hsa-miR-6891-5p	0	0.1452	0.1494	0.3454	0.0605	0.4466	0	0.7444	1.4386	0	0.193	0	1.9893	0	0	1.3748	0	0	0	0	0	0	0	0	0	0	0.5097	0	0	0	0.3675	0.1256	down	-1.5489	0.196582
hsa-miR-197-5p	0.0882	0.1452	0.8966	0.6044	0.121	0.5359	0.3839	1.0235	0.1798	0	1.158	0	0.5158	0	0.2466	0.3928	0.0871	0	0	0	0.1618	0	0.1676	0	0	0	1.2743	0	0	0.5802	0.3933	0.1776	down	-1.147	0.197325
hsa-miR-182-3p	0	0.1452	0	0	0	0.0893	0	0	0.1798	0	0	0	0	0	0	0	0	0	0	0	0	0	0	0	0	0	0	0	0	0	0.0276	0	down	-1.4647	0.198619
hsa-miR-7113-5p	0.1764	0	0	0.0863	0.1816	1.0718	0.096	0.1861	0	0	0	0	0.8105	0	0.9862	0	0.1741	0.1695	0	0.1695	0.2427	0	0	0	0	0.0835	0	0	0	0	0.2397	0.056	down	-2.0977	0.200431
hsa-miR-6868-3p	0	0.2179	0.2242	0	0.1816	1.0718	0.096	0	0.1798	0	0.386	0	1.4736	0	0	0	0.0871	0.2542	0	0.2542	0.1618	0	0	0.0913	0	0	0	0.0913	0	0	0.2554	0.0627	down	-2.0262	0.204621
hsa-miR-1296-5p	0	0.1452	0.1494	0.3454	0.2421	0.4466	0	0	0	0	0.0965	0	0	0.0924	0	0.2946	0.0871	0.0847	0	0.0847	0	0	0	0	0	0	0	0	0	0	0.1012	0.0367	down	-1.4634	0.205523
hsa-miR-1295b-3p	0	0	0	0	0	0	0	0	0	0	0	0	0	0	0	0.5892	0	0	0	0	0	0	0	0	0	0	0	0	0	0	0	0.0393	up	1.9745	0.207609
hsa-miR-1285-5p	0	0	0	0	0	0	0	0	0	0	0	0	0	0	0	0.5892	0	0	0	0	0	0	0	0	0	0	0	0	0	0	0	0.0393	up	1.9745	0.207715
hsa-miR-92a-3p	278.986	561.311	153.847	1474.49	98.2869	164.437	141.474	467.089	1024.45	5383.75	455.209	140.537	1186.46	654.596	32.4833	1642.92	1006.79	4274.65	1409.47	4274.65	1754.94	1713.52	1937.59	1135.47	1368.76	344.986	1618.77	1135.47	1409.47	295.831	814.493	1688.22	up	1.0515	0.210912
hsa-miR-3200-3p	0	0	0	0	0	0	0	0	0	0	0	0	1.3262	0	0	0	0	0	0	0	0	0	0	0	0.075	0	0.085	0	0	0	0.0884	0.0107	down	-3.0464	0.215047
hsa-let-7c-3p	0	0	0	0.0863	0	0	0.3839	1.5818	0.0899	0	0	0	0	0	0	0	0	0	0	0	0	0	0	0.0913	0	0	0	0.0913	0	0	0.1428	0.0122	down	-3.549	0.215466
hsa-miR-4800-3p	0.3528	0	0	0.0863	0	0	0.096	0	0	0.266	0	0	0	0	0	0.0982	0	0.0847	0	0.0847	0	0	0	0	0	0	0	0	0	0	0.0534	0.0178	down	-1.585	0.215991
hsa-miR-548t-5p	0	0	0	0.0863	0	0.268	0	0	0	0	0.772	0	0	0	0.3082	0	0	0	0	0	0	0.1652	0	0	0	0	0	0	0	0	0.0956	0.011	down	-3.1195	0.221327
hsa-miR-4733-3p	0	0	0	0	0	0	0	0	0	0	0	0	0	0	0	0	0	0	0.1734	0	0	0	0	0	0	0	0	0	0.1734	0	0	0.0231	up	1.2079	0.223512
hsa-miR-6784-3p	0	0	0	0	0	0	0	0	0	0	0	0	0	0	0	0	0	0.1695	0	0.1695	0	0	0	0	0	0	0	0	0	0	0	0.0226	up	1.1763	0.223756
hsa-miR-519b-3p	0	0	0	0	0	0	0	0	0	0	0	0	0	0	0	0	0	0.1695	0	0.1695	0	0	0	0	0	0	0	0	0	0	0	0.0226	up	1.1763	0.223856
hsa-miR-6747-5p	0	0	0.1494	0	0	0	0	0	0	0	0	0	0	0	0.1849	0	0	0	0	0	0	0	0	0	0	0	0	0	0	0	0.0223	0	down	-1.157	0.224409
hsa-miR-345-3p	0.1764	0.2179	1.0461	0.6044	0	0.0893	0.3839	1.954	1.9781	0	0.0965	0	0	0	0.8629	0	0.1741	0.0847	0.6937	0.0847	0.0809	0.0826	0	0	0.2998	0	0	0	0.6937	0.0414	0.494	0.149	down	-1.7292	0.226775
hsa-miR-6730-5p	0	0	0	0	0.0605	0.0893	0.192	0	0	0	0	0	0	0	0.3698	0	0.0871	0	0	0	0	0	0	0	0	0	0	0	0	0	0.0474	0.0058	down	-3.0308	0.230318
hsa-miR-6838-5p	0	0.0726	0	0	0	0	0	0	0	0	0.2895	0	0	0	0	0	0	0	0	0	0	0	0	0	0	0	0	0	0	0	0.0241	0	down	-1.269	0.230561
hsa-miR-873-3p	1.5877	0.581	3.5118	0	0.3631	0.6252	0.5759	4.4662	1.2588	0.1773	0.0965	1.4744	7.2942	0.1848	0.1233	1.1784	0	0.4237	0.4336	0.4237	1.0516	0.5781	0.0838	0.0913	0.6746	0.2506	3.3131	0.0913	0.4336	1.492	1.488	0.7013	down	-1.0853	0.231099
hsa-miR-323b-5p	0	0	0	0	0	0	0	0	0.2697	0	0	0	0	0	0.1849	0	0	0	0	0	0	0	0	0	0	0	0	0	0	0	0.0303	0	down	-1.5993	0.231137
hsa-miR-3186-5p	0	0.0726	0	0	0	0	0	0.3722	0	0	0	0	0	0	0	0	0	0	0	0	0	0	0	0	0	0	0	0	0	0	0.0297	0	down	-1.5705	0.234412
hsa-miR-6763-5p	0.0882	0.2905	0.9713	0.7771	0	1.1612	2.2075	2.6983	0.1798	0	0.772	0.1552	0.8842	0.0924	2.5272	0.8838	0.1741	0	0.4336	0	0.0809	0	0	0.274	0.7495	0	0.5947	0.274	0.4336	1.2848	0.8537	0.3455	down	-1.305	0.235367
hsa-miR-3940-3p	0	0.0726	0	0	0	0.0893	0	0.6513	0.3596	0.1773	0	0.0776	0.5894	0	0	0	0.0871	0.1695	0	0.1695	0.0809	0	0	0	0	0	0	0	0	0	0.1345	0.0338	down	-1.9925	0.235853
hsa-miR-5698	0.1764	0	1.1208	0.0863	0.121	1.0718	0.2879	0	0.0899	0	0	0	0	0	0.9246	0.0982	0	0	0	0	0.2427	0	0	0.274	0	0	0.5947	0.274	0	0	0.2586	0.0989	down	-1.3867	0.236553
hsa-miR-660-3p	0	0	0	0	0	0.1786	0	0	0	0	0	0	0	0	0.2466	0	0	0	0	0	0	0	0	0	0	0	0	0	0	0	0.0283	0	down	-1.5008	0.237401
hsa-miR-6846-5p	0	0	0	0	0	0.0893	0	0	0	0	0	0	0	0	0.2466	0	0	0	0	0	0	0	0	0	0	0	0	0	0	0	0.0224	0	down	-1.1635	0.239391
hsa-miR-208b-3p	0	0	0	0	0	0	0	0	0	0	0	0	0.5894	0	0.0616	0	0	0	0	0	0	0	0	0	0	0	0	0	0	0	0.0434	0	down	-2.1177	0.241942
hsa-miR-34b-3p	0.2646	0	0	0	0	0	0	0	0	0	0.0965	0	0	0.0924	0	0	0	0	0.6937	0	0	0	0	0	0	0	0	0	0.6937	0	0.0302	0.0925	up	1.6149	0.242591
hsa-miR-29b-2-5p	0	0.1452	0.3736	0	0.0605	0	0.3839	0	0.0899	0	0	0	0	0	0	0	0.5223	0.1695	0	0.1695	0.1618	0.0826	0.8379	0	0	0	0.5097	0	0	0	0.0702	0.1636	up	1.2206	0.244815
hsa-miR-4533	0.2646	0.6536	3.5865	1.3816	0.121	3.0369	2.8794	2.047	1.1689	0.3546	1.158	2.6385	1.0315	0	4.9311	0.5892	0.5223	0.4237	0	0.4237	2.5885	0.8258	0.419	1.5527	0	0.4177	0.085	1.5527	0	0.6217	1.6835	0.6681	down	-1.3333	0.246914
hsa-miR-363-5p	0.5292	0.1452	3.1382	0.259	0.121	1.0718	0.9598	3.0705	0.989	0.0887	0	0.1552	0.9578	0.1848	0.1849	0.5892	0	0.5931	0.5203	0.5931	0.4045	0.1652	0.5865	0.1827	0	0.0835	1.1044	0.1827	0.5203	0	0.7903	0.3684	down	-1.1011	0.247233
hsa-miR-29c-5p	0	0.0726	1.7933	0.1727	0.121	0.9825	0.8638	0.093	0.6294	0.1773	0	0.0776	0.3684	0.2772	0.678	0.6874	0	0.1695	0	0.1695	0.728	0.3303	0	0.274	0	0	0	0.274	0	0.0414	0.4205	0.1783	down	-1.2378	0.248626
hsa-miR-340-3p	0.6174	0.7262	2.9888	5.699	0.121	1.3398	1.0558	7.2576	5.0351	0.4433	0	0	0.6631	2.4946	0	1.1784	1.4799	1.1863	1.0405	1.1863	0.8898	0.4129	0.5027	0.4567	0	0	0	0.4567	1.0405	0	1.8961	0.6554	down	-1.5326	0.252077
hsa-miR-496	0	0	0	0	0	0	0	0	0.0899	0	0	0	0	0.2772	0	0	0	0	0	0	0	0	0	0	0	0	0	0	0	0	0.0245	0	down	-1.2928	0.253608
hsa-miR-194-3p	0	0	0	0	0	0	0.096	0	0	0	0	0	0	0.7391	0	2.3569	0	0	0	0	0.0809	0	0	0	0	0	0	0	0	1.2433	0.0557	0.2454	up	2.1394	0.254793
hsa-miR-6748-5p	0.0882	0.0726	0.4483	0	0	0.268	0	0	0	0	0	0	0	0	0.3082	0	0	0	0	0	0.1618	0	0	0	0	0.0835	0	0	0	0	0.079	0.0164	down	-2.2682	0.257395
hsa-miR-4734	0	0.0726	0.3736	0	0.1816	0.4466	0	1.6748	0	0	0.0965	0.8536	0	0	0	0	0	0.2542	0	0.2542	0.2427	0	0	0.0913	0	0.0835	0.1699	0.0913	0	0	0.2466	0.0791	down	-1.6404	0.257835
hsa-miR-3065-5p	0	0	0	0	0	0.1786	0	0	0	0	0	0	0	0.0924	0	0	0	0	0	0	0.0809	0.0826	0	0.0913	0	0	0.2549	0.0913	0	0	0.0181	0.0401	up	1.1476	0.262299
hsa-miR-3140-3p	0	0	0	0	0	0	0	0.2791	0	0	0	0	0	0.0924	0	0	0	0.2542	0	0.2542	0.1618	0.0826	0	0	0	0	0	0	0	0	0.0248	0.0502	up	1.0173	0.263486
hsa-miR-509-3-5p	0	0.0726	0	0.1727	0	0.0893	0	0	0.0899	0	0	0	0	0	0	0.1964	0.0871	0	0	0	0	0	0.419	0.0913	0	0	0	0.0913	0	0	0.0283	0.059	up	1.0599	0.265758
hsa-miR-5193	0.1764	0.2905	0	0	0	0.0893	0	0	0.1798	0	0	0	0	0	0	0.5892	0.1741	0.2542	0	0.2542	0.0809	0.4129	0	0	0	0	0	0	0	0	0.0491	0.1177	up	1.2613	0.266298
hsa-miR-887-3p	0	0	0	0	0	0	0	0.093	0	0	0.6755	0	0	0.2772	0	0	0	0	0	0	0	0	0	0	0	0	0.3398	0	0	0	0.0697	0.0227	down	-1.6185	0.269418
hsa-miR-3150b-5p	0	0	0	0.0863	0	0	0	0.093	0.1798	0	0	0	0	0	0	0	0	0	0	0	0	0	0	0	0	0	0	0	0	0	0.0239	0	down	-1.257	0.270435
hsa-miR-4788	0	0	0	0	0	0	0	0	0	0	0	0	0	0	0	0	0	0	0	0	0	0	0.3352	0	0	0	0	0	0	0	0	0.0223	up	1.157	0.274789
hsa-miR-520a-3p	0	0.0726	0.1494	0	0	0	0	0	0	0	0.6755	0.0776	0	0.0924	0	0	0	0	0	0	0	0.1652	0	0	0	0	0	0	0	0	0.0712	0.011	down	-2.6944	0.277282
hsa-miR-3065-3p	0	0	0.0747	0	0	0	0	0	0	0	0	0	0	0	0	0	0	0.0847	0	0.0847	0	0	0	0.0913	0	0	0	0.0913	0	0	0.005	0.0235	up	2.2327	0.277357
hsa-miR-1226-5p	0	0	0	0	0	0	0	0.3722	0	0	0	0	0	0	0	0	0.0871	0	0	0	0	0	0	0	0	0.0835	0.9345	0	0	0	0.0248	0.0737	up	1.5713	0.279009
hsa-miR-187-3p	0	0	0	0.259	0.121	0.1786	0	1.1165	0.7193	0	0	0	0.221	0.2772	0	0	0	0	0	0	0	0.0826	0	0.1827	0	0	0	0.1827	0	0.0829	0.1928	0.0354	down	-2.4453	0.281438
hsa-miR-6514-5p	0.2646	0.0726	0.523	0	0.2421	0.8039	1.3437	0.2791	1.3487	0.0887	0	0.0776	0.221	0.1848	0.1849	0.491	0	0.2542	0	0.2542	0.2427	0.1652	0	0.274	0	0.2506	0	0.274	0	0	0.3756	0.1471	down	-1.3524	0.285944
hsa-miR-4676-3p	0	0	0	0	0.0605	0.1786	0.096	0.3722	0	0	0	0.0776	0	0	0	0	0	0	0	0	0.1618	0	0	0	0	0	0	0	0	0	0.0523	0.0108	down	-2.2758	0.288102
hsa-miR-376c-3p	0	0	0	0	0	0.6252	0	0	0.7193	0.0887	0.6755	0	0	0.462	2.897	0	0	0.4237	0	0.4237	0	0.1652	0	0.0913	0	0.2506	0	0.0913	0	0	0.3645	0.0964	down	-1.9188	0.289706
hsa-miR-187-5p	0	0	0	0	0	0	0	0.2791	0	0	0	0	0.6631	0	0	0	0	0	0	0	0.0809	0	0	0	0	0	0	0	0	0	0.0628	0.0054	down	-3.5397	0.290098
hsa-miR-4772-5p	0	0	0.0747	0	0	0	0.6719	0	0	0	0	0	0	0	0	0	0	0.0847	0	0.0847	0	0	0	0	0	0	0	0	0	0	0.0498	0.0113	down	-2.1398	0.290453
hsa-miR-5683	0	0	0	0	0	0	0	0	0	0	0	0	0	0.7391	0	0	0	0	0	0	0	0.0826	0	0	0	0	0	0	0	0	0.0493	0.0055	down	-3.1641	0.293452
hsa-miR-576-3p	4.9394	1.4525	57.459	12.0025	5.7495	67.1682	21.7873	42.708	16.4538	1.6844	42.9443	47.3371	37.3554	12.7501	60.8369	5.9903	2.6987	6.3552	3.1216	6.3552	18.5242	8.5883	9.8036	4.3841	3.2979	3.7589	30.6678	4.3841	3.1216	87.7794	28.8419	13.2554	down	-1.1216	0.295841
hsa-miR-487b-5p	0	0	0	0	0	0	0	0.5583	0	0	0	0	0	0	0.2466	0	0	0	0	0	0.0809	0	0	0	0	0	0	0	0	0	0.0537	0.0054	down	-3.3139	0.296716
hsa-miR-6779-5p	0.3528	0.0726	0	0.259	0	0.1786	0.3839	0.2791	0	0	0	0	0	0	0.3698	0	0	0	0	0	0	0	0	0	0.6746	0	0	0	0	0	0.1264	0.045	down	-1.49	0.298667
hsa-miR-1273c	0.0882	0	0.1494	0	0	0.6252	0.2879	0.3722	0	0	0.965	0	0.5158	0.0924	0.4315	0.1964	0	0.0847	0	0.0847	0.1618	0.1652	0	0.0913	0	0	0.6796	0.0913	0	0	0.2352	0.1037	down	-1.1815	0.30132
hsa-miR-4743-3p	0	0	0	0	0	0.1786	0	0	0	0	0	0	0	0	0.3082	0	0	0	0	0	0	0	0.6703	0	0	0.3341	0	0	0	0	0.0325	0.067	up	1.0437	0.302573
hsa-miR-3131	0	0	0	0	0	0	0	0	0	0	0	0	0	0	0.3082	0	0	0	0	0	0	0	0	0	0	0	0	0	0	0	0.0205	0	down	-1.0356	0.303882
hsa-miR-935	0	0	0	0.259	0	0	0	0	0.0899	0	0	0	0	0.0924	0.0616	0	0	0	0	0	0	0.0826	0	0	0	0	0	0	0	0	0.0335	0.0055	down	-2.6067	0.30563
hsa-miR-374b-3p	0	0	0	0.3454	0	0.1786	0	0.7444	0.3596	0	0	0	0	0	0	0	0	0	0	0	0	0	0.0838	0.0913	0	0	0	0.0913	0	0	0.1085	0.0178	down	-2.6077	0.307781
hsa-miR-378j	0	0	0	0	0.0605	0	0	0	0	0	0	0.1552	0.221	0	0	0.491	0	0	0	0	0.0809	0	0.0838	0	0.075	0	0.6796	0	0	0.0829	0.0291	0.0995	up	1.7737	0.308106
hsa-miR-331-3p	0.5292	1.0167	1.1955	1.8133	0.121	2.4116	0.6719	2.6053	2.4276	0.1773	0.8685	0.2328	0.8105	0.5544	0.5547	1.1784	0.2612	0.8474	0.0867	0.8474	0.8898	0.5781	0.419	0.1827	0.2998	0.4177	0.5947	0.1827	0.0867	0.8703	1.066	0.5162	down	-1.0462	0.308585
hsa-miR-130a-3p	0	0.6536	0.2989	3.972	1.0289	18.1318	0.4799	3.7218	4.6754	0.7092	4.3427	0.5432	10.0941	1.0163	9.1841	1.964	0.3482	4.0673	0.3468	4.0673	4.0446	1.8993	0.5865	1.2787	0.9744	0.7518	3.3981	1.2787	0.3468	0.0414	3.9235	1.6929	down	-1.2126	0.311582
hsa-miR-616-5p	0.5292	0	0	0	0	0.0893	0	0	0	0	0	0	0	0	0	0	0	0	0	0	0.0809	0	0	0	0	0	0	0	0	0	0.0412	0.0054	down	-2.9316	0.313868
hsa-miR-3179	0	0	0	0	0	0	0	0	0	0	0	0.1552	0	0.0924	0	0	0	0	0	0	0	0.0826	0.6703	0.0913	0	0	0	0.0913	0	0	0.0165	0.0624	up	1.9191	0.315985
hsa-miR-15b-5p	0.6174	0.1452	1.4944	1.0362	0.121	0.5359	0.2879	2.6053	3.1469	0.1773	1.9301	0	0.7368	0.5544	0	0.6874	0.4353	0.6779	0	0.6779	0.5662	0.2477	0.8379	0.1827	0.075	0.2506	0.4248	0.1827	0	0.0414	0.8926	0.3525	down	-1.3404	0.316853
hsa-miR-3920	0	0	0	0	0.0605	0.1786	0	0	0.4496	0	0	0	0	0.0924	0	0	0	0	0	0	0	0.0826	0	0	0	0	0	0	0	0	0.0521	0.0055	down	-3.2438	0.321094
hsa-miR-6783-3p	0	0	0	0.1727	0	0	0	0	0	0	0	0	0	0.0924	0	0	0	0	0	0	0.0809	0	0	0.274	0	0	0	0.274	0	0	0.0177	0.0419	up	1.2432	0.322395
hsa-miR-4470	0.7056	0.9441	5.0809	1.0362	0.6052	1.8757	1.7276	3.9079	1.2588	0.0887	0.6755	1.0088	1.0315	0	2.897	0.491	0.0871	0.8474	0	0.8474	2.1841	0.7432	0	0.548	0	1.0024	3.2282	0.548	0	0.8289	1.5229	0.757	down	-1.0085	0.322919
hsa-miR-6879-3p	0.1764	0	0	0	0	0	0	0	0	0	0	0	0.1474	0	0	0	0	0	0	0	0	0	0	0	0	0	0	0	0	0	0.0216	0	down	-1.111	0.324784
hsa-miR-4707-3p	0	0	0	0	0	0	0	0	0	0	0	0.0776	0	0	0	0	0	0	0	0	0.1618	0	0	0.0913	0	0	0	0.0913	0	0	0.0052	0.023	up	2.1451	0.329323
hsa-miR-5090	0	0	0	0	0	0	0	0.2791	0	0	0	0.0776	0	0	0	0	0	0	0	0	0	0	0	0	0	0	0	0	0	0	0.0238	0	down	-1.251	0.330778
hsa-miR-6770-5p	0	0	0.2242	0	0	0.1786	0	0	0	0	0	0	0	0	0	0	0	0	0	0	0	0	0	0	0	0	0	0	0	0	0.0269	0	down	-1.4276	0.330802
hsa-miR-4498	0	0.1452	0.4483	0.0863	0.0605	1.1612	0	0.093	0.1798	0	0.2895	0.3104	1.1052	0.0924	1.2944	0	0.2612	0.2542	0	0.2542	0	0.0826	0	0.0913	0	0	0.085	0.0913	0	0.5802	0.3511	0.1133	down	-1.6317	0.33267
hsa-miR-4746-5p	1.8523	0.7262	1.1208	1.727	0.1816	2.5903	0.6719	2.1401	4.7653	0.4433	2.1231	0.776	2.8735	0.3696	2.7737	0.1964	0.6964	1.7794	0	1.7794	2.1841	0.6606	0.419	0.822	0	0.3341	2.4636	0.822	0	0	1.6756	0.8105	down	-1.0478	0.333256
hsa-miR-603	0	0	0	0.1727	0	0	0	0	0	0	0	0	0.2947	0	0	0	0	0	0	0	0	0	0	0	0	0	0	0	0	0	0.0312	0	down	-1.6415	0.334704
hsa-miR-153-3p	0	0	0	0	0	0	0	0	0.2697	0	0	0	0	0.0924	0	0	0	0	0	0	0	0	0	0	0	0	0	0	0	0	0.0241	0	down	-1.269	0.338099
hsa-miR-147b	0	0	0.2989	0.4317	0	0.268	0	0.4652	0	0	0.386	0	0.9578	0	0	0	0	0	0.1734	0	0	0	0	0.0913	0	0	0	0.0913	0.1734	0.0414	0.1872	0.0381	down	-2.2967	0.338706
hsa-miR-412-5p	0	0	0	0	0	0.268	0	0	0	0	0	0	0	0.0924	0	0	0	0	0	0	0	0	0	0	0	0	0	0	0	0	0.024	0	down	-1.263	0.339285
hsa-miR-504-5p	0.0882	0.1452	0.0747	0.5181	0.121	0.5359	0.192	0.5583	0.7193	0.1773	0	0.2328	0.5158	0.462	0	0.3928	0.3482	0.0847	0	0.0847	0.3236	0.1652	0.2514	0	0	0	0	0	0	0.3316	0.2894	0.1321	down	-1.1314	0.340062
hsa-miR-1289	0	0	0	0	0	0.0893	0	0	0.3596	0	0	0	0	0	0	0	0	0	0	0	0	0	0	0	0	0	0	0	0	0	0.0299	0	down	-1.5801	0.34089
hsa-miR-3174	0	0.0726	0	0	0.0605	0.1786	0	0.2791	0	0	0	0.1552	0	0.6467	0	0	0	0.1695	0	0.1695	0	0.1652	0	0	0	0	0	0	0	0	0.0928	0.0336	down	-1.4657	0.345124
hsa-miR-3074-5p	0	0.1452	2.6152	1.1225	0.1816	3.4835	0.192	2.6983	0.1798	0.1773	0.6755	0.776	0.1474	0.1848	3.1435	0.1964	0	0.8474	0	0.8474	2.1032	0.5781	0	0.1827	1.0493	0.2506	1.5291	0.1827	0	0	1.0482	0.5178	down	-1.0174	0.347423
hsa-miR-1262	0.3528	0	0	0	0	0	0.096	0.3722	0.0899	0	0	0.1552	0	0	0	0	0	0	0	0	0.0809	0	0	0.0913	0	0	0	0.0913	0	0	0.0711	0.0176	down	-2.0143	0.34867
hsa-miR-3130-3p	0.5292	0.2905	0.523	0	0.2421	1.4291	0.096	0	0	0	0.579	0.3104	0.4421	0.0924	0.9246	0.3928	0	0.2542	0	0.2542	0.5662	0.1652	0.2514	0	0	0	0	0	0	0.746	0.3639	0.1753	down	-1.0537	0.349001
hsa-miR-1276	0	0	0	0.0863	0	0	0	0	0	0	0	0	0	0.0924	0	0	0.0871	0.0847	0	0.0847	0.1618	0	0	0	0	0	0	0	0	0.0414	0.0119	0.0306	up	1.3626	0.356239
hsa-miR-382-3p	0.5292	0	5.5292	0.5181	0.0605	1.5184	0	0.5583	1.3487	0	0.0965	1.164	0	1.4783	0.1233	0.2946	0	1.1016	0	1.1016	1.0516	0.2477	0	0.0913	0	0	0	0.0913	0	1.0361	0.8616	0.3344	down	-1.3654	0.362078
hsa-miR-4644	0	0	0.3736	0	0	0.3573	0	0.3722	0	0	0	0	0	0	0.3082	0	0	0	0	0	0	0	0.3352	0	0	0	0	0	0	0	0.0941	0.0223	down	-2.0772	0.367203
hsa-miR-493-5p	0.7056	0.1452	4.782	5.2673	0.4237	1.7864	0.192	1.3026	1.3487	0	0	0.776	0	6.5598	0.4315	0.1964	0.6964	2.881	0.4336	2.881	0.6471	1.0735	0.0838	0.3653	0	0.3341	0.5947	0.3653	0.4336	0	1.5814	0.7324	down	-1.1105	0.367553
hsa-miR-6762-3p	0	0	0	0	0	0	0	0	0	0	0	0	0	0	0.2466	0	0	0	0	0	0	0	0	0	0	0	0.085	0	0	0	0.0164	0.0057	down	-1.5247	0.369719
hsa-miR-1185-1-3p	0	0.0726	0	0.5181	0	0.268	0	0.1861	0	0.1773	0.579	0	0	0.1848	0.4931	0	0	0.1695	0	0.1695	0.4045	0.2477	0	0	0	0	0	0	0	0	0.1653	0.0661	down	-1.3224	0.373101
hsa-miR-9-3p	0	0	0	0	0	0	0.3839	4.5592	0.1798	0	2.4126	0	0	1.5707	0	0.0982	0	0.4237	0.6937	0.4237	0.1618	0.0826	0.419	0	0	0	0.2549	0	0.6937	0	0.6071	0.2168	down	-1.4856	0.389239
hsa-miR-548j-3p	0	0	0	0.5181	0.2421	3.1262	0	0.093	0.989	0	0	0	0	0.0924	0.8013	0.0982	0	0.1695	0	0.1695	0	0.0826	0.5865	0.0913	0	0.1671	1.3592	0.0913	0	0	0.3908	0.1877	down	-1.058	0.395354
hsa-miR-4745-5p	0.2646	0.0726	0	0.0863	0	0.5359	0	0	0	0.0887	0.2895	0.1552	1.3999	0.0924	0	0.0982	0	0	0.2601	0	0.1618	0	0.3352	0	0	0	0.3398	0	0.2601	0	0.199	0.097	down	-1.0367	0.400601
hsa-miR-4737	0	0	0	0	0	0	0	0	0	0	0	0	0.4421	0	0	0	0	0	0	0	0	0	0	0	0	0	0	0	0	0	0.0295	0	down	-1.5607	0.401812
hsa-miR-6835-5p	0	0	0	0	0	0	0	0.4652	0	0	0	0	0	0	0	0	0	0	0	0	0	0	0	0	0	0	0	0	0	0	0.031	0	down	-1.6323	0.404826
hsa-miR-943	0.2646	0.2179	0.3736	0	0	0.7146	0.2879	0.093	0.0899	0	0	0.1552	0	0	0.3698	0	0.0871	0.0847	0	0.0847	0	0.0826	0	0.274	0	0	0	0.274	0	0	0.1711	0.0591	down	-1.5336	0.405412
hsa-miR-337-5p	0	0.0726	0	0	0	0	0	0.2791	0	0	0	0	0	0	0.7397	0	0.1741	0	0	0	0.0809	0	0	0	0	0	0	0	0	0	0.0728	0.017	down	-2.0984	0.407901
hsa-miR-432-5p	25.0496	1.9608	36.9113	47.7508	6.5363	24.0269	10.0778	8.0019	26.5239	6.7377	28.1792	5.7425	15.2516	16.6305	45.7355	14.2393	24.3754	20.1671	0.9538	20.1671	16.3401	7.7625	4.6923	4.8407	2.2485	7.2673	6.8812	4.8407	0.9538	14.0911	20.3411	9.9881	down	-1.0261	0.408328
hsa-miR-8072	0	0	0	0	0	0	0	0.093	0	0	0	0	0	0	0.1849	0.2946	0	0	0	0	0	0	0	0.0913	0	0.0835	0	0.0913	0	0	0.0185	0.0374	up	1.0155	0.409745
hsa-miR-6721-5p	0	0.4357	0	0	0.121	0.7146	0.096	0	0.4496	0.7092	0	0	0	0.5544	0	0	0.6094	0.1695	0	0.1695	0.2427	0.2477	0	0	0.075	0	0	0	0	0	0.2054	0.1009	down	-1.0255	0.410233
hsa-miR-1283	0	0	0	0	0	0	0	0	0	0	0.4825	0	0	0	0	0	0	0	0	0	0	0	0	0	0	0	0	0	0	0	0.0322	0	down	-1.6871	0.412033
hsa-miR-3154	0	0	0	0.259	0.121	0	0.3839	1.8609	0.1798	0	0	0.2328	0	0	0	0	0	0	0	0	0	0	0	0	1.0493	0	0	0	0	0	0.2025	0.07	down	-1.5325	0.41535
hsa-miR-6877-5p	0.5292	0.2905	2.391	0	0.2421	1.3398	1.9196	3.1636	0.6294	0.0887	4.8252	1.7072	1.9893	0.2772	1.9108	0	0	0.5931	0	0.5931	2.265	0.4955	0.8379	0	0	0.3341	0.7646	0	0	3.2327	1.4202	0.6077	down	-1.2247	0.416433
hsa-miR-4454	0	0	0	0	0.0605	0.1786	0	0	0	0	0.6755	0	0.0737	0	0	0	0	0	0	0	0	0	0	0.0913	0	0	0	0.0913	0	0	0.0659	0.0122	down	-2.4334	0.42279
hsa-miR-675-5p	0	0	0	0	0	0	0	0	0	0	1.2546	0.0776	0.7368	0	0	0	0	0	0	0	0	0	0	0.0913	0	0	0.4248	0.0913	0	0	0.1379	0.0405	down	-1.7676	0.422935
hsa-miR-6820-5p	0.0882	0.0726	0.2989	0	0	0	0	0	0.0899	0	0	0	0	0	0	0	0	0	0	0	0	0	0	0	0	0.0835	0	0	0	0	0.0366	0.0056	down	-2.7083	0.425347
hsa-miR-487a-3p	0	0	0	0	0	0.0893	0.096	0.093	0	0	0	0	0	0.0924	0	0	0	0.2542	0	0.2542	0.1618	0	0	0	0	0	0.085	0	0	0	0.0247	0.0503	up	1.026	0.427547
hsa-miR-3196	0	0	0.0747	0	0	0.0893	0.2879	0.093	0	0.1773	1.2546	0	0	0.0924	0	0	0	0.0847	0	0.0847	0.0809	0.0826	0.3352	0	0	0.0835	0	0	0	0	0.1379	0.0501	down	-1.4607	0.427618
hsa-miR-1827	0	0	0	0.0863	0	0.0893	0	0	0	0	0	0	0.0737	0.1848	0	0	0	0	0	0	0	0	0	0	0.075	0	0.085	0	0	0	0.0289	0.0107	down	-1.4335	0.428922
hsa-miR-543	45.6008	6.173	63.4366	118.384	1.8762	33.9414	7.3904	12.0029	77.0543	6.4717	10.5189	3.8801	14.3675	5.7283	35.5652	16.3998	28.9893	23.2175	3.902	23.2175	25.0764	10.7353	7.2899	8.1288	12.217	11.1933	29.3086	8.1288	3.902	1.4091	29.4927	14.2077	down	-1.0537	0.430731
hsa-miR-654-3p	1.0584	0.5084	1.2702	8.5485	0.2421	1.3398	0.9598	1.3026	5.7543	0.7092	0.579	0.1552	1.1789	1.5707	1.7259	0.3928	2.0023	1.7794	0	1.7794	1.2943	0.7432	0	1.0047	0	0.2506	1.9539	1.0047	0	0	1.7935	0.8137	down	-1.1402	0.432963
hsa-miR-6129	0	0	0	0	0	0	0	0.093	0	0	0	0	0	0	0	0.0982	0	0	0	0	0	0	0	0.0913	0	0	0	0.0913	0	0	0.0062	0.0187	up	1.5927	0.4346
hsa-miR-1469	0	0	0	0	0	0	0	0	0	0	0	0.0776	0	0	0	0	0	0	0	0	0	0	0	0	0.4497	0	0	0	0	0	0.0052	0.03	up	2.5284	0.434968
hsa-miR-26a-2-3p	0	0	0	0	0.0605	0.0893	0.096	0.8374	0	0	0	0	0.1474	0	0	0	0	0	0	0	0	0	0	0	0.075	0.0835	0	0	0	0.0414	0.082	0.0133	down	-2.6242	0.435446
hsa-miR-3620-3p	0.0882	0	0	0	0	0	0	0	0	0	0	0	0	0	0	0	0	0.0847	0	0.0847	0	0.0826	0	0	0	0	0	0	0	0	0.0059	0.0168	up	1.5097	0.435733
hsa-miR-6821-3p	0	0	0	0	0	0	0	0	0	0.3546	0	0	0	0	0	0	0	0	0	0	0	0.0826	0	0	0	0	0	0	0	0	0.0236	0.0055	down	-2.1013	0.438681
hsa-miR-548au-5p	0	0	0	0	0	0	0	0	0.1798	0	0	0.0776	0	0.0924	0	0	0	0	0	0	0.0809	0	0	0	0	0	0	0	0	0	0.0233	0.0054	down	-2.1093	0.438689
hsa-miR-548b-5p	0	0	0	0	0	0	0	0	0	0	0	0	0	0.0924	0	0	0	0.0847	0	0.0847	0	0	0	0	0	0	0.2549	0	0	0	0.0062	0.0283	up	2.1905	0.439046
hsa-miR-1248	0	0	0	0	0	0	0.192	0	0	0	0	0	0	0	0	0	0	0	0.3468	0	0	0	0	0	0	0	0	0	0.3468	0	0.0128	0.0462	up	1.8517	0.439335
hsa-miR-301a-3p	0	0	0	0	0	0	0	1.4887	1.7083	0	0	0	0	0	0	0	0	0	0	0	0	0	0	0	0.5996	0	0	0	0	0	0.2131	0.04	down	-2.4135	0.440814
hsa-miR-3944-3p	0	0	0	0	0	0	0	0	0	0	0.772	0	0	0	0	0	0	0	0	0	0	0	0	0	0	0	0	0	0	0.0414	0.0515	0.0028	down	-4.2011	0.440938
hsa-miR-323a-5p	0.5292	0	3.1382	0.5181	0	0.9825	0	0.1861	0.6294	0.4433	1.6406	0.1552	1.2525	0	10.1703	0.3928	0.5223	0.0847	0.5203	0.0847	0.4045	0.4129	0	0.274	0	0.5847	1.699	0.274	0.5203	3.1498	1.3097	0.5949	down	-1.1385	0.444717
hsa-miR-4660	0	0	0	0	0	0	0	0.3722	0.0899	0	0	0	0	0	0	0	0	0	0	0	0	0.0826	0	0	0	0.0835	0.7646	0	0	0	0.0308	0.062	up	1.0093	0.445727
hsa-miR-548a-3p	0	0	0	0.259	0.0605	0.268	0	0	0.1798	0	0	0	0	0.1848	0.3698	0	0	0.2542	0	0.2542	0	0	0	0	0	0	0	0	0	0	0.0881	0.0339	down	-1.3779	0.447634
hsa-miR-6753-3p	0	0	0	0	0	0.0893	0	0.2791	0.1798	0	0	0	0	0	0	0	0	0	0	0	0	0.0826	0	0	0	0	0	0	0	0	0.0365	0.0055	down	-2.7304	0.45232
hsa-miR-4727-3p	0	0.0726	0	0	0	0	0	0.2791	0	0	0	0.0776	0	0	0	0	0	0	0	0	0.0809	0	0	0	0	0	0	0	0	0	0.0286	0.0054	down	-2.405	0.455377
hsa-miR-6827-3p	0	0.0726	0	0	0	0	0	0	0	0	0	0	0	0	0	0	0.0871	0.0847	0	0.0847	0	0	0	0	0	0	0	0	0	0	0.0048	0.0171	up	1.8329	0.456841
hsa-miR-190b	0	0.1452	0	0	0.2421	0.3573	0.096	0.1861	1.3487	0	0	0	0.9578	0	0	0	0	0.4237	0	0.4237	0.3236	0	0	0	0	0	0	0	0	0	0.2222	0.0781	down	-1.5085	0.457463
hsa-miR-6875-5p	0	0	0	0	0.121	1.1612	0.2879	0.1861	0	0	0	0.2328	0.3684	0	0.4931	0	0.3482	0	0	0	0.1618	0	0	0	0.5247	0	0	0	0	0	0.19	0.069	down	-1.4613	0.458456
hsa-miR-592	0	0	0	0	0	0	0	0	0	0.266	0	0	0	0	0	0	0	0	0	0	0	0	0	0	0	0	0	0	0	0.0414	0.0177	0.0028	down	-2.6603	0.458807
hsa-miR-6755-5p	0	0	0	0.259	0	0.3573	0	0	0.0899	0	0	0.0776	0	0	0	0	0	0.0847	0	0.0847	0.0809	0	0	0	0	0	0	0	0	0	0.0523	0.0167	down	-1.647	0.459026
hsa-miR-299-3p	0	0.0726	0	0	0	0	0	0.3722	0	0	0	0	0	0.1848	0	0	0	0	0	0	0	0	0	0	0	0	0	0	0	0.0829	0.042	0.0055	down	-2.9329	0.464749
hsa-miR-6809-5p	0	0.0726	0.523	0	0.121	1.5184	0.096	0.3722	0.6294	0	0	0	1.1052	0	0	0.2946	0.0871	0	0	0	0	0	0	0.274	0	0.0835	0.5947	0.274	0	0	0.2959	0.1072	down	-1.4648	0.466681
hsa-miR-3157-3p	0.1764	0.1452	0.5978	0.5181	0.0605	0.3573	0	0	0.7193	0	0.8685	0.0776	0.8105	0.0924	0.6164	0	0.0871	0	0	0	0.2427	0	0	0	0	0	0	0	0	1.2848	0.336	0.1076	down	-1.6428	0.467307
hsa-miR-7-1-3p	0	0	0	0	0.0605	0.1786	0	0.093	0.5395	0	0	0	0	0	0	0	0	0.0847	0	0.0847	0	0	0	0	0.075	0	0	0	0	0	0.0581	0.0163	down	-1.8337	0.470916
hsa-miR-383-5p	0.1764	0	0	0	0	0.0893	0.192	0.6513	0	0.0887	0	0	0	0	0	0	0.0871	0	0	0	0.0809	0	0	0	0	0.3341	1.9539	0	0	0	0.0798	0.1637	up	1.0366	0.471948
hsa-miR-4749-5p	0	0	0.0747	0	0	0	0	0	0	0	0	0	0	0	0	0	0	0	0	0	0	0.0826	0	0	0	0	0.4248	0	0	0	0.005	0.0338	up	2.757	0.478546
hsa-miR-4700-5p	0	0	0	0	0	0	0.4799	1.3026	0	0	0	0	0	0	0	0	0	0	0	0	0	0	0	0	0	0.1671	0.2549	0	0	0	0.1188	0.0281	down	-2.0799	0.490208
hsa-miR-7849-3p	0.2646	0.2179	0.1494	0.7771	0.3026	1.6971	0.6719	1.0235	1.0789	0	0	0.776	0	0.3696	0	0	0.1741	0.5084	0.4336	0.5084	0.728	0.4129	0	0.0913	0	0.1671	0	0.0913	0.4336	0	0.4886	0.2366	down	-1.0462	0.493489
hsa-miR-3138	0	0	0.0747	0	0.0605	0.3573	0.192	0	0	0	0	0	0	0	0	0	0	0	0	0	0	0	0	0.0913	0	0	0	0.0913	0	0	0.0456	0.0122	down	-1.9022	0.500031
hsa-miR-6847-3p	0	0	0	0	0	0.0893	0	0	0.4496	0	0	0	0	0	0	0	0	0	0	0	0	0	0.0838	0	0	0	0	0	0	0	0.0359	0.0056	down	-2.6805	0.504156
hsa-miR-3663-5p	0	0	0.2242	0	0	0	0	0.3722	0	0	0	0	0	0	0	0	0	0	0	0	0	0	0	0	0	0	0.2549	0	0	0	0.0398	0.017	down	-1.2272	0.504511
hsa-miR-3186-3p	0	0	0.2242	0	0	0	0.192	0	0	0	0	0	0	0	0	0	0	0	0	0	0.0809	0	0	0	0	0	0	0	0	0	0.0277	0.0054	down	-2.3589	0.505319
hsa-miR-4482-5p	0	0	0.2242	0	0	0	0	0	0	0	0	0	0.8105	0	0	0	0	0	0	0	0	0.0826	0	0	0	0	0	0	0	0	0.069	0.0055	down	-3.6491	0.507564
hsa-miR-138-1-3p	0	0	0	0	0	0	0	0	0	0	0	0	0	0.0924	0	0	0	0.1695	0	0.1695	0	0	0	0	0	0	0	0	0	0	0.0062	0.0226	up	1.866	0.508651
hsa-miR-4639-5p	0	0	0	0	0	0.0893	0	0	0	0	0	0.2328	0	0	0	0.0982	0	0	0	0	0	0	0	0	0	0	0	0	0	0	0.0215	0.0065	down	-1.7258	0.5137
hsa-miR-5094	0	0.1452	0	0	0	0	0	0	0	0	0	0	0	0.1848	0	0	0	0	0	0	0	0.0826	0	0	0	0	0	0	0	0	0.022	0.0055	down	-2	0.516048
hsa-miR-449c-5p	0	0	0	0	0	0	0	0.1861	0	0	0	0	0	0.3696	0	0	0	0	0	0	0.1618	0	0	0	0	0	0	0	0	0	0.037	0.0108	down	-1.7765	0.51872
hsa-let-7g-3p	0	0	0	0	0.0605	0.268	0	0	0	0	0	0	0.5894	0.0924	0	0	0	0.0847	0	0.0847	0	0	0	0	0.1499	0	0	0	0	0	0.0674	0.0213	down	-1.6619	0.538628
hsa-miR-5003-3p	0	0	0	0.1727	0	0	0	0	0	0	0	0	0	0	0	0	0	0.0847	0	0.0847	0.1618	0.0826	0	0	0	0	0	0	0	0	0.0115	0.0276	up	1.263	0.540693
hsa-miR-3155a	0	0	0.3736	0	0	0	0.2879	0	0.1798	0	0.772	0	0	0	0	0	0	0	0	0	0	0.1652	0	0.0913	0	0	0	0.0913	0	0	0.1076	0.0232	down	-2.2135	0.541205
hsa-miR-6788-5p	0	0	0.3736	0	0	0.6252	0	0.3722	0	0	0	0	0	0	0.2466	0	0	0	0	0	0	0	0.5027	0	0	0	0	0	0	0	0.1078	0.0335	down	-1.6861	0.542348
hsa-miR-5088-5p	0	0	0	0	0	0.1786	0	0	0	0	0	0	0	0	0	0	0	0	0	0	0	0	0	0	0	0	0.7646	0	0	0	0.0119	0.051	up	2.0995	0.547464
hsa-miR-1910-5p	0	0	0	0	0	0	0	0	0	0.0887	0	0	0	0	0	0.0982	0	0	0	0	0	0.0826	0	0.0913	0	0	0	0.0913	0	0	0.0059	0.0242	up	2.0362	0.548928
hsa-miR-4797-3p	0	0	0	0	0	0.0893	0	0	0	0	0	0.0776	0	0	0	0	0	0	0.1734	0	0	0	0	0	0	0	0.1699	0	0.1734	0	0.0111	0.0344	up	1.6318	0.549889
hsa-miR-6761-5p	0	0	0.1494	0	0	0	0.2879	0	0	0	0	0	0	0.0924	0	0.6874	0	0	0	0	0	0	0	0	0	0	1.3592	0	0	0	0.0353	0.1364	up	1.9501	0.554333
hsa-miR-3121-3p	0	0	0	0	0	0	0	0	0	0.3546	0	0	0	0	0	0	0	0.0847	0.4336	0.0847	0	0.0826	0	0	0	0	0	0	0.4336	0	0.0236	0.0746	up	1.6604	0.560364
hsa-miR-4425	0	0	0	0	0	0	0	0	0	0	0	0	0.3684	0	0	0	0	0	0	0	0	0	0	0	0	0	0.085	0	0	0	0.0246	0.0057	down	-2.1096	0.5658
hsa-miR-6801-5p	0	0	0	0	0	0	0	0	0	0	0	0	0	0	0	0	0	0	0	0	0	0	0	0	0	0	0.3398	0	0	0	0	0.0227	up	1.1827	0.56787
hsa-miR-5584-3p	0	0	0	0	0	0	0	0	0	0	0	0	0	0	0	0	0	0	0	0	0	0	0	0	0	0	0.3398	0	0	0	0	0.0227	up	1.1827	0.567888
hsa-miR-4745-3p	0	0	0	0	0	0	0	0	0	0	0	0	0	0	0	0	0	0	0	0	0	0	0	0	0	0	0.3398	0	0	0	0	0.0227	up	1.1827	0.567909
hsa-miR-3934-3p	0	0	0	0	0	0	0	0	0	0	0	0	0	0	0	0	0	0	0	0	0	0	0	0	0	0	0.3398	0	0	0	0	0.0227	up	1.1827	0.567983
hsa-miR-5708	0	0	0	0	0	0	0	0	0	0	0	0	0	0	0	0	0	0	0	0	0	0	0	0	0	0	0.4248	0	0	0	0	0.0283	up	1.5008	0.57619
hsa-miR-4445-5p	0	0	0	0	0	0	0	0	0	0	0	0	0	0	0	0	0	0	0	0	0	0	0	0	0	0	0.4248	0	0	0	0	0.0283	up	1.5008	0.576262
hsa-miR-186-3p	0	0	0	0	0	0	0	0	0	0	0	0	0	0	0	0	0	0	0	0	0	0	0	0	0	0	0.4248	0	0	0	0	0.0283	up	1.5008	0.576326
hsa-miR-208a-3p	0.0882	0.2179	0	0	0	0	0.192	0	0	0	0.0965	0	0	0	0	0	0.1741	0	0	0	0.0809	0	0	0	0	0	0	0	0	0	0.0396	0.017	down	-1.22	0.584676
hsa-miR-504-3p	0	0	0	0	0	0.0893	0.192	0	0.3596	0	0.4825	0	0.7368	0	0	0.1964	0	0	0	0	0	0	0	0.0913	0	0	0.5097	0.0913	0	0	0.124	0.0592	down	-1.0667	0.595063
hsa-miR-4733-5p	0	0	0	0	0	0	0	0.3722	0	0	0	0	0	0	0	0	0	0	0	0	0	0	0	0	0	0	0	0	0	0	0.0248	0	down	-1.3103	0.59724
hsa-miR-4649-5p	0	0	0	0	0	0	0	0.3722	0	0	0	0	0	0	0	0	0	0	0	0	0	0	0	0	0	0	0	0	0	0	0.0248	0	down	-1.3103	0.597291
hsa-miR-6764-5p	0	0	0	0	0	0.0893	0	0	0	0.0887	0	0	0	0	0	0	0	0	0	0	0.3236	0.0826	0	0	0	0	0	0	0	0	0.0119	0.0271	up	1.1873	0.600798
hsa-miR-6833-5p	0	0	0.0747	0	0	0	0.4799	0.5583	0.1798	0	0	0	0	0	0.4931	0	0	0	0	0	0	0	0	0.274	0	0	0	0.274	0	0	0.1191	0.0365	down	-1.7062	0.601633
hsa-miR-4504	0	0	0	0	0.0605	0.1786	0	0.4652	0.4496	0	0	0.388	0.5158	0.2772	0.3082	0	0	0.3389	0	0.3389	0.1618	0.0826	0.1676	0.0913	0	0	0	0.0913	0	0	0.1762	0.0848	down	-1.0551	0.60395
hsa-miR-6128	0	0	0	0	0	0.268	0.192	0.093	0	0	0.0965	0.0776	0.0737	0	0	0.0982	0	0	0.0867	0	0	0	0	0	0	0	0.085	0	0.0867	0.0414	0.0534	0.0265	down	-1.0108	0.604622
hsa-miR-495-3p	0.6174	0	1.2702	4.4901	0.1816	7.1456	0	1.3026	6.3837	0.0887	0.0965	0.388	1.1789	1.6631	2.0341	0.5892	0.9576	3.0505	0	3.0505	1.7796	0.8258	0.3352	0.0913	0.6746	0.2506	0.5947	0.0913	0	0.0414	1.7894	0.8222	down	-1.1219	0.609428
hsa-miR-6775-3p	0	0	0	0.0863	0	0.268	0	0	0.3596	0	0	0	0	0	0.0616	0.1964	0	0	0	0	0	0.0826	0	0	0	0	0	0	0	0	0.0517	0.0186	down	-1.4749	0.611568
hsa-miR-6791-5p	0.2646	0.0726	0.3736	0.3454	0.0605	0.5359	0.192	0.5583	0.2697	0	4.0532	0.2328	0	0	0.4315	0	0	0.0847	0	0.0847	0.1618	0	0.3352	0.274	0	0.1671	0.4248	0.274	0	1.119	0.4927	0.195	down	-1.3372	0.612327
hsa-let-7e-3p	0	0.0726	0.3736	0.259	0.0605	0	0	1.3957	0.2697	0	0	0	0	0.0924	0	0	0	0.1695	0	0.1695	0.2427	0.1652	0	0	0	0.0835	0.085	0	0	0.0414	0.1682	0.0638	down	-1.3985	0.615882
hsa-miR-5189-3p	0	0	0.0747	1.0362	0	0.9825	0.192	1.2096	0.3596	0	0	0.1552	1.4736	0	0.3082	0	0	0	0	0	0	0	0.6703	0.4567	0.3748	0	0	0.4567	0	0	0.3861	0.1306	down	-1.5638	0.61794
hsa-miR-4500	0	0	0	0	0	0.0893	0	0	0	0	0.0965	0	0.0737	0.0924	0	0	0	0	0	0	0.3236	0	0	0	0	0	0.4248	0	0	0	0.0235	0.0499	up	1.0864	0.622962
hsa-miR-6791-3p	0	0	0	0	0.0605	0.1786	0	0	0	0	0	0	0	0	0	0	0	0.0847	0	0.0847	0.3236	0	0	0	0	0	0	0	0	0	0.0159	0.0329	up	1.0491	0.636703
hsa-miR-129-1-3p	0	0.0726	0	0	0	0	0	0	0	0	0	0	0	0.2772	0	0	0	0	0	0	0	0.0826	0	0	0	0	0	0	0	0	0.0233	0.0055	down	-2.0828	0.636747
hsa-miR-5004-3p	0	0.0726	0.2989	0.6044	0	0.1786	0	0	0.5395	0	0	0.1552	0.7368	0	0.2466	0	0.2612	0	0	0	0	0	0	0.274	0	0	0	0.274	0	0	0.1888	0.0539	down	-1.8085	0.641965
hsa-miR-4433a-5p	0	0	0	0	0	0	0	0	0.0899	0	0	0	0	0	0	0	0	0.0847	0	0.0847	0.0809	0	0	0	0	0	0	0	0	0	0.006	0.0167	up	1.4768	0.646136
hsa-miR-1306-5p	0.5292	0.1452	0.2989	0	0	0.1786	0	0	0.2697	0	0	0	0	0	0.0616	0	0.1741	0	0	0	0.3236	0	0	0	0	0.0835	0	0	0	0.0414	0.0989	0.0415	down	-1.2529	0.651368
hsa-miR-6735-5p	0	0	0.523	0.1727	0	0.9825	0	0.093	0	0	0.4825	0.0776	0	0.0924	0.4315	0	0.1741	0	0	0	0.3236	0.4129	0	0	0	0.0835	0	0	0	0	0.1903	0.0663	down	-1.5212	0.656265
hsa-miR-6885-3p	0	0	0	0	0	0.1786	0	0	0	0	0	0	0.8842	0	0	0	0	0.0847	0	0.0847	0.0809	0	0	0	0	0	0	0	0	0	0.0709	0.0167	down	-2.0859	0.656272
hsa-miR-1261	0	0	0	0	0	0	0	0	0	0.0887	0	0	0	0.3696	0	0	0	0	0.5203	0	0	0	0	0	0	0	0	0	0.5203	0	0.0306	0.0694	up	1.1814	0.65924
hsa-miR-542-5p	0	0	0	0	0.0605	0	0	0	0	0	0	0	0	0	0	0	0	0.0847	0	0.0847	0.0809	0	0	0	0	0	0	0	0	0	0.004	0.0167	up	2.0618	0.661241
hsa-miR-539-3p	0	0	0	0.3454	0	0	0	0.093	0.0899	0	0	0	0	0.1848	0	0	0	0.0847	0	0.0847	0.1618	0	0	0	0	0	0	0	0	0	0.0475	0.0221	down	-1.1039	0.666379
hsa-miR-873-5p	0	0	0.3736	0.0863	0	0	0	0	0.0899	0	0.193	0	1.4736	0	0	0	0	0	0	0	0	0	0	0.1827	0	0.0835	0	0.1827	0	0	0.1478	0.0299	down	-2.3054	0.668714
hsa-miR-4762-3p	0	0	0	0.1727	0.121	0.8932	0.4799	0	0.0899	0	0	0	0	0.0924	0	0.1964	0	0	0	0	0	0	0	0.274	0	0	0.1699	0.274	0	0	0.1233	0.061	down	-1.0153	0.669739
hsa-miR-1236-5p	0	0	0	0	0	0	0	0	0.4496	0	0	0	0	0	0.2466	0	0	0	0	0	0	0	0.0838	0	0	0.0835	0	0	0	0	0.0464	0.0112	down	-2.0506	0.677527
hsa-miR-6834-5p	0	0	0.1494	0	0	0	0	0	0	0	0	0	0	0	0	0.0982	0	0	0	0	0	0	0	0	0	0	0.3398	0	0	0	0.01	0.0292	up	1.546	0.683992
hsa-miR-6503-5p	0.3528	0	0.2989	0	0	0.0893	0	0.093	0	0	0	0	0	0	0	0.0982	0	0	0	0	0	0.1652	0	0	0	0	0	0	0	0	0.0556	0.0176	down	-1.6595	0.690766
hsa-miR-511-3p	0.1764	0	0	0	0	0	0	0	0	0	0	0	0	0.0924	0	0	0	0	0	0	0.0809	0	0	0	0	0	0	0	0	0	0.0179	0.0054	down	-1.7289	0.691055
hsa-miR-6880-3p	0	0	0	0	0	0	0.096	0	0	0.0887	0	0	0	0	0	0	0	0	0	0	0	0.0826	0	0	0	0	0	0	0	0	0.0123	0.0055	down	-1.1612	0.702247
hsa-miR-4697-5p	0	0	0	0	0	0	0	1.1165	0	0	0	0	0	0	0	0	0	0	0	0	0.0809	0	0	0	0	0	0.4248	0	0	0	0.0744	0.0337	down	-1.1426	0.704933
hsa-miR-6502-5p	0	0	0.1494	0	0	0.0893	0.096	0.1861	0	0	0	0	0	0	0	0	0	0.0847	0	0.0847	0	0	0	0	0	0	0	0	0	0	0.0347	0.0113	down	-1.6186	0.718682
hsa-miR-7848-3p	0	0	0.1494	0.7771	0	0	0.2879	0	0.3596	0.266	0	0	0.8842	0	0	0	0.5223	0	0	0	0	0.0826	0.5027	0	0	0	0	0	0	0	0.1816	0.0738	down	-1.2991	0.718703
hsa-miR-212-3p	0	0	0	0	0	0	0	0	0	0	0	0	0	0.1848	0	0	0	0	0	0	0	0	0	0	0	0	0	0	0	0.0414	0.0123	0.0028	down	-2.1352	0.722593
hsa-miR-4526	0	0	0	0	0	0	0	0	0	0	0.386	0	0	0	0	0	0	0	0	0	0	0	0.0838	0	0	0	0	0	0	0	0.0257	0.0056	down	-2.1983	0.727026
hsa-miR-98-3p	0	0	0.0747	0	0.121	0	0	0.3722	0.0899	0	0.0965	0	0	0.1848	0	0	0	0	0	0	0	0.1652	0	0	0	0.0835	0.085	0	0	0	0.0626	0.0222	down	-1.4956	0.727122
hsa-miR-1323	0	0.0726	0.3736	0	0	0	0	0.093	0	0	0	0	0	0	0	0	0	0	0	0	0.1618	0.1652	0	0	0	0	0.7646	0	0	0	0.0359	0.0728	up	1.02	0.734068
hsa-miR-1266-5p	0	0.0726	0	0	0	0	0	0	0	0	0	0	0	0	0	0	0.1741	0	0	0	0	0	0	0	0	0	0	0	0	0	0.0048	0.0116	up	1.273	0.742283
hsa-miR-503-5p	0.1764	0.0726	0	0.7771	0	0	0	1.7679	1.5285	0	0	0.0776	0	0	0	0	0	0.0847	0.3468	0.0847	0	0.0826	0	0.0913	0.075	0.1671	0	0.0913	0.3468	0.1658	0.2933	0.1024	down	-1.5182	0.75356
hsa-miR-6715b-3p	0	0	0.2989	0	0	0	0	0	0	0	0	0	0	0.0924	0	0.0982	0	0	0	0	0	0.0826	0	0	0	0	0	0	0	0	0.0261	0.0121	down	-1.109	0.763983
hsa-miR-329-3p	0.5292	0	0.7472	1.986	0	1.8757	0	0.093	0.8092	0.266	0	0	0	0.1848	1.0478	0.2946	0.7835	0.4237	0	0.4237	0.2427	0.1652	0	0.1827	0	0.4177	0	0.1827	0	0	0.5026	0.2078	down	-1.2742	0.771678
hsa-miR-4642	0	0.0726	0	0	0	0	0	0	0	0	0.965	0	0	0	0	0	0	0.1695	0	0.1695	0	0	0	0	0	0	0	0	0	0	0.0692	0.0226	down	-1.6144	0.77333
hsa-miR-6777-5p	0	0	0	0.259	0	0	0	0.1861	0	0	0.4825	0	0.3684	0	0.1849	0	0	0	0	0	0	0	0	0.0913	0.3748	0	0	0.0913	0	0	0.0987	0.0372	down	-1.4077	0.783167
hsa-miR-34a-5p	0	0.0726	0.1494	0.6044	0.121	0	0	4.8384	2.7873	0	0.0965	0	0	0	0	0.2946	0	0	0	0	0.4045	0.1652	0	0.3653	1.499	0.0835	0	0.3653	0	0.0829	0.578	0.2174	down	-1.4107	0.784643
hsa-miR-551a	0.0882	0.0726	0	0	0	0	0.096	0.7444	0.1798	0	0	0.0776	0	0	0	0	0	0	0	0	0	0	0	0	0.5996	0	0	0	0	0	0.0839	0.04	down	-1.0687	0.785394
hsa-miR-5581-3p	0	0	0	0.4317	0	0.0893	0	0	0	0	0	0	0	0	0	0	0	0	0	0	0	0.0826	0	0	0	0	0	0	0	0	0.0347	0.0055	down	-2.6574	0.786403
hsa-miR-4659a-5p	0	0	0	0	0	0.0893	0	0	0.2697	0	0	0	0	0	0	0	0	0	0	0	0	0	0	0	0	0.1671	0	0	0	0	0.0239	0.0111	down	-1.1065	0.792179
hsa-miR-18a-5p	0.5292	0.2179	0.0747	0.9498	0.1816	0.9825	0.5759	2.7914	2.3377	0	1.2546	0	0.9578	0.3696	0.1233	0	0.2612	0.9321	0.5203	0.9321	1.3752	0.4129	0	0	0.075	0.2506	0.085	0	0.5203	0.1243	0.7564	0.3659	down	-1.0477	0.793562
hsa-miR-487a-5p	0.1764	0	0.1494	0.259	0.0605	0	0.096	0.1861	0.3596	0	0	0.2328	0.9578	0.0924	0.1849	0	0.3482	0.3389	0	0.3389	0.2427	0.0826	0	0	0	0	0	0	0	0	0.1837	0.0901	down	-1.0278	0.795661
hsa-miR-6855-5p	0.0882	0	0.4483	0	0	0.9825	0.2879	0.5583	0.0899	0.0887	0	0.0776	0.3684	0	0	0	0	0.0847	0	0.0847	0.1618	0.0826	0	0.0913	0	0.3341	0.5097	0.0913	0	0	0.1993	0.096	down	-1.0538	0.796822
hsa-miR-483-3p	0	0	0	0	0	0.0893	0	0	0.1798	2.3936	0	0.1552	0	0.0924	0	2.6515	0.5223	0.0847	0.7804	0.0847	0.0809	0.5781	0.419	0	0	0.1671	0.5097	0	0.7804	0	0.194	0.4439	up	1.1942	0.797268
hsa-miR-519a-5p	0	0	0	0	0.0605	0	0	0	0	0	0	0	0	0	0	0	0	0	0	0	0	0	0	0	0	0	0.7646	0	0	0	0.004	0.051	up	3.6724	0.79971
hsa-miR-522-5p	0	0	0	0	0.0605	0	0	0	0	0	0	0	0	0	0	0	0	0	0	0	0	0	0	0	0	0	0.7646	0	0	0	0.004	0.051	up	3.6724	0.799794
hsa-miR-518e-5p	0	0	0	0	0.0605	0	0	0	0	0	0	0	0	0	0	0	0	0	0	0	0	0	0	0	0	0	0.7646	0	0	0	0.004	0.051	up	3.6724	0.799879
hsa-miR-523-5p	0	0	0	0	0.0605	0	0	0	0	0	0	0	0	0	0	0	0	0	0	0	0	0	0	0	0	0	0.7646	0	0	0	0.004	0.051	up	3.6724	0.799928
hsa-miR-519b-5p	0	0	0	0	0.0605	0	0	0	0	0	0	0	0	0	0	0	0	0	0	0	0	0	0	0	0	0	0.7646	0	0	0	0.004	0.051	up	3.6724	0.800035
hsa-miR-519c-5p	0	0	0	0	0.0605	0	0	0	0	0	0	0	0	0	0	0	0	0	0	0	0	0	0	0	0	0	0.7646	0	0	0	0.004	0.051	up	3.6724	0.800077
hsa-miR-598-5p	0	0	0.0747	0	0	0	0	0	0	0	0.772	0.0776	0	0	0.1849	0	0.2612	0	0	0	0	0.0826	0	0	0	0.1671	0	0	0	0	0.0739	0.0341	down	-1.1158	0.827529
hsa-miR-6837-5p	0	0.0726	0	0	0	0.0893	0.192	0	0.4496	0	0	0	0	0	0	0	0	0	0	0	0.1618	0	0	0.0913	0	0	0	0.0913	0	0	0.0536	0.023	down	-1.2206	0.844337
hsa-miR-7152-3p	0	0	0	0	0	0	0	0	0	0	0	0	1.6209	0	0	0.7856	0	0	0	0	0	0	0	0	0	0	0	0	0	0	0.1081	0.0524	down	-1.0447	0.917583
hsa-miR-103a-2-5p	0	0	0	0	0	0	0	0	0	0	0.4825	0	0	0	0.0616	0	0	0	0	0	0.2427	0	0	0	0	0	0	0	0	0	0.0363	0.0162	down	-1.164	1
hsa-miR-718	0	0	0	0	0	0	0	0	0	0	0	0	0	0	0	0	0	0	0	0	0	0	0	0	0.075	0	0	0	0	0	0	0.005	down	-1	1
hsa-miR-548ay-3p	0	0	0	0	0.0605	0.1786	0	0	0	0	0	0	0	0	0	0	0	0.0847	0	0.0847	0	0	0	0	0	0	0.3398	0	0	0	0.0159	0.0339	up	1.0923	1
hsa-miR-3178	0	0	0.0747	0	0	0	0	0	0	0	0	0	0	0	0	0	0	0.0847	0	0.0847	0	0	0	0	0	0	0	0	0	0	0.005	0.0113	up	1.1763	1
hsa-miR-3925-5p	0	0	0	0	0	0	0	0	0	0	0	0.0776	0	0	0	0	0	0.0847	0	0.0847	0	0	0	0	0	0	0	0	0	0	0.0052	0.0113	up	1.1197	1
hsa-miR-4531	0	0	0	0	0	0.268	0	0	0	0	0	0	0	0	0	0	0	0	0	0	0.0809	0	0	0	0	0	0	0	0	0	0.0179	0.0054	down	-1.7289	1
hsa-miR-3150a-3p	0	0	0	0	0	0	0	0	0	0	0	0.0776	0	0	0	0	0	0	0	0	0.1618	0	0	0	0	0	0	0	0	0	0.0052	0.0108	up	1.0544	1
hsa-miR-548av-5p	0	0	0.0747	0	0	0	0	0	0	0	0	0	0	0	0	0	0	0	0	0	0	0	0	0	0	0	0	0	0	0	0.005	0	up	1	1
hsa-miR-6780a-3p	0	0.0726	0	0	0	0	0	0	0	0	0	0	0	0	0	0	0	0	0	0	0	0	0	0	0	0	0	0	0	0	0.0048	0	up	1.0589	1
hsa-miR-5787	0	0	0	0	0	0	0	0	0	0	0	0	0	0	0	0	0	0	0	0	0	0	0	0	0	0	0	0	0	0.0414	0	0.0028	down	-1.8365	1
hsa-miR-3149	0	0	0	0	0.0605	0	0	0	0	0	0	0	0	0	0	0	0	0	0	0	0	0	0	0	0	0	0	0	0	0	0.004	0	up	1.3219	1
hsa-miR-6750-5p	0	0	0.0747	0	0	0	0	0	0	0	0	0	0	0	0	0	0	0	0	0	0	0	0	0	0	0	0	0	0	0	0.005	0	up	1	1
hsa-miR-219a-5p	0	0	0	0	0	0	0	0	0	0	0	0	0	0	0	0	0	0	0	0	0	0	0	0	0	0	0	0	0	0.0414	0	0.0028	down	-1.8365	1
hsa-miR-3144-3p	0	0	0	0	0	0	0	0	0	0	0	0	0	0	0	0	0	0	0	0	0	0	0	0	0	0	0	0	0	0.0414	0	0.0028	down	-1.8365	1
hsa-miR-99a-3p	0	0	0	0	0	0	0	0.6513	0	0	0	0	0	0	0	0	0	0	0	0	0	0	0	0	0	0.0835	0	0	0	0.0414	0.0434	0.0083	down	-2.3865	1
hsa-miR-548e-5p	0	0	0	0	0.0605	0	0	0	0	0	0	0	0	0	0	0	0	0	0	0	0	0	0	0	0	0	0	0	0	0	0.004	0	up	1.3219	1
hsa-miR-5187-3p	0	0	0	0	0.0605	0	0	0	0	0	0	0	0	0	0	0	0	0	0	0	0	0	0	0	0	0	0	0	0	0	0.004	0	up	1.3219	1
hsa-miR-570-3p	0	0	0	0	0.0605	0	0	0	0	0	0	0	0	0	0	0	0	0	0	0	0	0	0	0	0	0	0	0	0	0	0.004	0	up	1.3219	1
hsa-miR-4682	0	0	0.0747	0	0	0	0	0	0	0	0	0	0	0	0	0	0	0	0	0	0	0	0	0	0	0	0	0	0	0	0.005	0	up	1	1
hsa-miR-629-3p	0	0	0	0	0	0.1786	0	0	0.2697	0	0	0	0	0	0	0	0	0	0	0	0	0.1652	0	0	0	0	0	0	0	0	0.0299	0.011	down	-1.4426	1
hsa-miR-302b-3p	0	0	0	0	0	0	0	0	0	0	0	0	0	0	0	0	0	0	0	0	0	0	0	0	0	0	0	0	0	0.0414	0	0.0028	down	-1.8365	1
hsa-miR-6873-5p	0	0	0	0	0.0605	0	0	0	0	0	0	0	0	0	0	0	0	0	0	0	0	0	0	0	0	0	0	0	0	0	0.004	0	up	1.3219	1
hsa-miR-3156-5p	0	0	0	0	0	0	0	0	0	0	0	0	0	0	0.0616	0	0	0	0	0	0	0	0	0	0	0	0	0	0	0	0.0041	0	up	1.2863	1
hsa-miR-6860	0	0	0	0	0	0	0	0	0	0	0	0	0	0	0	0	0	0	0	0	0	0	0	0	0.075	0	0	0	0	0	0	0.005	down	-1	1
hsa-miR-384	0	0	0	0	0	0	0	0	0	0	0	0	0.0737	0	0	0	0	0	0	0	0	0	0	0	0	0	0	0	0	0	0.0049	0	up	1.0291	1
hsa-miR-3529-5p	0	0	0.0747	0	0	0	0	0	0	0	0	0	0	0	0	0	0	0	0	0	0	0	0	0	0	0	0	0	0	0	0.005	0	up	1	1
hsa-miR-6845-3p	0	0.0726	0	0	0	0	0	0	0	0	0	0	0	0	0	0	0	0	0	0	0	0	0	0	0	0	0	0	0	0	0.0048	0	up	1.0589	1
hsa-miR-1915-3p	0	0	0	0	0	0	0	0	0	0	0	0	0	0	0	0	0	0	0	0	0	0	0	0	0	0	0	0	0	0.0414	0	0.0028	down	-1.8365	1
hsa-miR-1185-2-3p	0	0	0	0.1727	0	0	0	0	0.0899	0	0	0	0	0	0	0	0	0	0	0	0.0809	0	0	0	0	0	0	0	0	0	0.0175	0.0054	down	-1.6963	1
hsa-miR-4655-5p	0	0	0	0	0	0	0	0.1861	0	0	0	0	0	0	0	0	0	0	0	0	0.0809	0	0	0	0	0	0	0	0	0	0.0124	0.0054	down	-1.1993	1
hsa-miR-2277-3p	0	0	0	0	0	0.0893	0	0.093	0	0	0	0.0776	0	0	0	0	0	0	0	0	0.0809	0	0	0	0	0	0	0	0	0	0.0173	0.0054	down	-1.6797	1
hsa-miR-370-5p	0	0	0.0747	0	0	0	0	0	0	0	0	0	0	0	0	0	0	0	0	0	0	0	0	0	0	0	0	0	0	0	0.005	0	up	1	1
hsa-miR-3942-5p	0	0	0	0	0.0605	0	0	0	0	0	0	0	0	0	0	0	0	0	0	0	0	0	0	0	0	0	0	0	0	0	0.004	0	up	1.3219	1
hsa-miR-744-3p	0	0	0.0747	0	0	0.6252	0	0.4652	0.4496	0	0	0.1552	0	0.0924	0	0	0	0.0847	0	0.0847	0	0	0	0.1827	0	0.1671	0.085	0.1827	0	0	0.1242	0.0525	down	-1.2423	1
hsa-miR-6507-5p	0	0.0726	0	0	0	0	0	0	0	0	0	0	0	0	0	0	0	0	0	0	0	0	0	0	0	0	0	0	0	0	0.0048	0	up	1.0589	1
hsa-miR-138-5p	0	0	0	0.0863	0	0	0	0	0	0	0	0	0	0.0924	0	0	0	0	0	0	0	0	0	0	0	0	0	0	0	0.0414	0.0119	0.0028	down	-2.0875	1
hsa-miR-1197	0	0	0	0.0863	0	0	0	0.093	0.1798	0	0	0	0	0.0924	0	0	0	0	0	0	0	0	0	0.0913	0	0	0	0.0913	0	0	0.0301	0.0122	down	-1.3029	1
hsa-miR-5095	0	0	0	0	0.0605	0	0	0	0	0	0	0	0	0	0	0	0	0	0	0	0	0	0	0	0	0	0	0	0	0	0.004	0	up	1.3219	1
hsa-miR-33b-3p	0	0	0	0	0	0	0	0	0	0	0	0	0	0	0.0616	0	0	0	0	0	0	0	0	0	0	0	0	0	0	0	0.0041	0	up	1.2863	1
hsa-miR-652-5p	0	0	0	0	0.0605	0	0	0	0	0	0	0	0	0	0	0	0	0	0	0	0.1618	0	0	0	0	0	0	0	0	0	0.004	0.0108	up	1.433	1
hsa-miR-4446-5p	0	0	0.0747	0	0	0.268	0	0	0	0	0	0	0	0	0	0	0	0	0	0	0	0	0	0	0	0.0835	0	0	0	0	0.0228	0.0056	down	-2.0255	1
hsa-miR-548at-3p	0	0	0	0	0.0605	0	0	0	0	0	0	0	0	0	0	0	0	0	0	0	0	0	0	0	0	0	0	0	0	0	0.004	0	up	1.3219	1
hsa-miR-4638-3p	0	0.0726	0	0	0	0	0	0	0	0	0	0	0	0	0	0	0	0	0	0	0	0	0	0	0	0	0	0	0	0	0.0048	0	up	1.0589	1
hsa-miR-3910	0	0	0	0	0	0	0	0	0	0	0	0	0	0	0	0	0	0	0	0	0	0	0	0	0.075	0	0	0	0	0	0	0.005	down	-1	1
hsa-miR-6889-3p	0	0	0	0	0	0	0	0	0.1798	0	0	0	0	0	0	0	0	0	0	0	0.0809	0	0	0	0	0	0	0	0	0	0.012	0.0054	down	-1.152	1
hsa-miR-4522	0	0	0.0747	0	0	0	0	0.2791	0	0	0	0	0	0	0	0	0	0	0	0	0.0809	0	0	0	0	0	0	0	0	0	0.0236	0.0054	down	-2.1278	1
hsa-miR-1293	0	0	0	0	0	0.1786	0	0	0	0.0887	0	0	0	0	0	0	0	0	0	0	0	0	0	0	0	0	0.5947	0	0	0	0.0178	0.0396	up	1.1536	1
hsa-miR-7152-5p	0	0.0726	0	0	0	0	0	0	0	0	0	0	0	0	0	0	0	0	0	0	0	0	0	0	0	0	0	0	0	0	0.0048	0	up	1.0589	1
hsa-miR-4281	0	0	0	0	0	0	0	0	0	0	0	0	0.0737	0	0	0	0	0	0	0	0	0	0	0	0	0	0	0	0	0	0.0049	0	up	1.0291	1
